# Supplementary material for: Dr. PIAS 2.0: an update of a database of predicted druggable protein–protein interactions
Source: Oxford University Press journal article supplement (doi:10.1093/database/bas034), 2012-01-01
Supplement: bas034_Supplementary_Data.zip [file bas034_Supplementary_Data.zip]

Table S1. Druggability scores of the positive instances<sup>a</sup>

| Interactor1 | Interactor2 | PDB entries used for detecting the pockets located on PPI interface | Druggability score    |                          |                       |                |
|-------------|-------------|---------------------------------------------------------------------|-----------------------|--------------------------|-----------------------|----------------|
|             |             |                                                                     | Structural attributes | Drug/chemical attributes | Functional attributes | All attributes |
| ARF1        | CYTH2       | 1s9d_A <sup>b</sup>                                                 | 0.8602                | 0.9961                   | 0.7766                | 0.8805         |
| ARF1        | CYTH2       | 1s9d_E <sup>b</sup>                                                 | 0.6310                | 0.9961                   | 0.7766                | 0.7037         |
| ARF1        | CYTH2       | 1r8q_A <sup>b</sup>                                                 | 0.9793                | 0.9961                   | 0.7766                | 0.8688         |
| ARF1        | CYTH2       | 1r8q_E <sup>b</sup>                                                 | 0.5617                | 0.9961                   | 0.7766                | 0.8922         |
| ARF1        | CYTH2       | 1r8q_B <sup>b</sup>                                                 | 0.9816                | 0.9961                   | 0.7766                | 0.8637         |
| ARF1        | CYTH2       | 1r8q_F <sup>b</sup>                                                 | 0.5684                | 0.9961                   | 0.7766                | 0.8899         |
| ARF1        | CYTH2       | 1r8q_BF <sup>c</sup>                                                | 0.9217                | 0.9961                   | 0.7766                | 0.9691         |
| ARF1        | CYTH2       | 1s9d_AE <sup>c</sup>                                                | 0.6139                | 0.9961                   | 0.7766                | 0.9281         |
| ARF1        | CYTH2       | 1r8s_AE <sup>c</sup>                                                | 0.8594                | 0.9961                   | 0.7766                | 0.9779         |
| ARF1        | CYTH1       | 1s9d_A <sup>b</sup>                                                 | 0.8602                | 0.7025                   | 0.7189                | 0.8671         |
| ARF1        | CYTH1       | 1s9d_E <sup>b</sup>                                                 | 0.6310                | 0.7025                   | 0.7189                | 0.6614         |
| ARF1        | CYTH1       | 1r8q_A <sup>b</sup>                                                 | 0.9793                | 0.7025                   | 0.7189                | 0.8435         |
| ARF1        | CYTH1       | 1r8q_E <sup>b</sup>                                                 | 0.5617                | 0.7025                   | 0.7189                | 0.8834         |
| ARF1        | CYTH1       | 1r8q_B <sup>b</sup>                                                 | 0.9816                | 0.7025                   | 0.7189                | 0.8384         |
| ARF1        | CYTH1       | 1r8q_F <sup>b</sup>                                                 | 0.5684                | 0.7025                   | 0.7189                | 0.8796         |
| ARF1        | CYTH1       | 1r8q_BF <sup>c</sup>                                                | 0.9217                | 0.7025                   | 0.7189                | 0.9635         |
| ARF1        | CYTH1       | 1s9d_AE <sup>c</sup>                                                | 0.6139                | 0.7025                   | 0.7189                | 0.9129         |
| ARF1        | CYTH1       | 1r8s_AE <sup>c</sup>                                                | 0.8594                | 0.7025                   | 0.7189                | 0.9748         |
| BAK1        | BCL2        | 2o2f_A                                                              | 0.9943                | 0.6671                   | 0.9432                | 0.9489         |
| BAK1        | BCL2        | 2o22_A                                                              | 0.9884                | 0.6671                   | 0.9432                | 0.9610         |
| BAK1        | BCL2        | 2o21_A                                                              | 0.9905                | 0.6671                   | 0.9432                | 0.9434         |
| BAK1        | BCL2        | 1ysw_A                                                              | 0.9902                | 0.6671                   | 0.9432                | 0.9461         |
| BAK1        | BCL2L1      | 2o2n_A                                                              | 0.9867                | 0.4991                   | 0.8962                | 0.9427         |
| BAK1        | BCL2L1      | 2o2m_A                                                              | 0.9950                | 0.4991                   | 0.8962                | 0.8553         |
| BAK1        | BCL2L1      | 2yxj_A                                                              | 0.9938                | 0.4991                   | 0.8962                | 0.9459         |
| BAK1        | BCL2L1      | 2yxj_B                                                              | 0.9957                | 0.4991                   | 0.8962                | 0.9332         |
| BAK1        | BCL2L1      | 1ysi_A                                                              | 0.9802                | 0.4991                   | 0.8962                | 0.9258         |
| BAK1        | BCL2L1      | 2w3l_A                                                              | 0.9639                | 0.4991                   | 0.8962                | 0.8404         |
| BAK1        | BCL2L1      | 2w3l_B                                                              | 0.9739                | 0.4991                   | 0.8962                | 0.8390         |
| BAK1        | BCL2L1      | 3inq_A                                                              | 0.9391                | 0.4991                   | 0.8962                | 0.9304         |
| BAK1        | BCL2L1      | 3inq_B                                                              | 0.9967                | 0.4991                   | 0.8962                | 0.8909         |
| CALM1       | CAMK1       | 1mux_A pocket1                                                      | 0.9952                | 0.9998                   | 0.9991                | 0.9866         |
| CALM1       | CAMK1       | 1mux_A pocket2                                                      | 0.9855                | 0.9998                   | 0.9991                | 0.9879         |
| CALM1       | MYLK        | 1mux_A pocket1                                                      | 0.9952                | 0.9998                   | 0.9971                | 0.9932         |
| CALM1       | MYLK        | 1mux_A pocket2                                                      | 0.9855                | 0.9998                   | 0.9971                | 0.9951         |
| CALM1       | PDE1A       | 1qiv_A                                                              | 1.0000                | 1.0000                   | 0.9838                | 0.9993         |
| CD4         | HLA-DQB1    | 1jl4_D                                                              | 0.7982                | 0.9913                   | 0.9991                | 0.9400         |
| CREBBP      | TP53        | 2d82_A                                                              | 0.9815                | 0.7397                   | 1.0000                | 0.9835         |
| ESR1        | NCOA2       | 3erd_A                                                              | 0.7780                | 0.9998                   | 0.9914                | 0.9589         |
| ESR1        | NCOA2       | 3erd_B                                                              | 0.9159                | 0.9998                   | 0.9914                | 0.9521         |
| FKBP1A      | TGFBR1      | 1fkj_A                                                              | 0.9938                | 0.9999                   | 0.9942                | 0.9532         |
| FKBP1A      | TGFBR1      | 1fkf_A                                                              | 0.9825                | 0.9999                   | 0.9942                | 0.9516         |
| EGFR        | GRB2        | 1cj1_B                                                              | 0.9923                | 0.9998                   | 0.9995                | 0.9992         |
| EGFR        | GRB2        | 1cj1_C                                                              | 0.9928                | 0.9998                   | 0.9995                | 0.9992         |
| EGFR        | GRB2        | 1cj1_D                                                              | 0.9920                | 0.9998                   | 0.9995                | 0.9992         |
| EGFR        | GRB2        | 1cj1_E                                                              | 0.9943                | 0.9998                   | 0.9995                | 0.9991         |
| EGFR        | GRB2        | 1cj1_F                                                              | 0.9901                | 0.9998                   | 0.9995                | 0.9992         |
| EGFR        | GRB2        | 1cj1_G                                                              | 0.9903                | 0.9998                   | 0.9995                | 0.9991         |
| EGFR        | GRB2        | 1cj1_H                                                              | 0.9887                | 0.9998                   | 0.9995                | 0.9991         |
| EGFR        | GRB2        | 1cj1_I                                                              | 0.9952                | 0.9998                   | 0.9995                | 0.9992         |
| EGFR        | GRB2        | 1cj1_J                                                              | 0.9925                | 0.9998                   | 0.9995                | 0.9992         |
| GRB2        | MET         | 1cj1_B                                                              | 0.9923                | 0.9964                   | 1.0000                | 0.9999         |
| GRB2        | MET         | 1cj1_C                                                              | 0.9928                | 0.9964                   | 1.0000                | 0.9999         |
| GRB2        | MET         | 1cj1_D                                                              | 0.9920                | 0.9964                   | 1.0000                | 0.9999         |
| GRB2        | MET         | 1cj1_E                                                              | 0.9943                | 0.9964                   | 1.0000                | 1.0000         |
| GRB2        | MET         | 1cj1_F                                                              | 0.9901                | 0.9964                   | 1.0000                | 0.9999         |
| GRB2        | MET         | 1cj1_G                                                              | 0.9903                | 0.9964                   | 1.0000                | 0.9999         |
| GRB2        | MET         | 1cj1_H                                                              | 0.9887                | 0.9964                   | 1.0000                | 0.9998         |
| GRB2        | MET         | 1cj1_I                                                              | 0.9952                | 0.9964                   | 1.0000                | 0.9999         |
| GRB2        | MET         | 1cj1_J                                                              | 0.9925                | 0.9964                   | 1.0000                | 0.9999         |
| HOXB1       | PBX1        | 1b72_B                                                              | 0.8647                | 0.0000                   | 0.7546                | 0.6464         |
| IL1B        | IL1R1       | 1itb_B                                                              | 0.8352                | 0.9991                   | 0.9967                | 0.8652         |
| IL2         | IL2RA       | 1py2_A                                                              | 0.9474                | 0.9940                   | 0.9980                | 0.8907         |
| IL2         | IL2RA       | 1py2_B                                                              | 0.9560                | 0.9940                   | 0.9980                | 0.8969         |
| IL2         | IL2RA       | 1py2_C                                                              | 0.9920                | 0.9940                   | 0.9980                | 0.8915         |

Table S1. (continued)

| Interactor1 | Interactor2 | PDB entries used for detecting the pockets located on PPI interface | Druggability score    |                          |                       |                |
|-------------|-------------|---------------------------------------------------------------------|-----------------------|--------------------------|-----------------------|----------------|
|             |             |                                                                     | Structural attributes | Drug/chemical attributes | Functional attributes | All attributes |
| IL2         | IL2RA       | 1py2_D                                                              | 0.9889                | 0.9940                   | 0.9980                | 0.8844         |
| IL2         | IL2RA       | 1m48_A                                                              | 0.8257                | 0.9940                   | 0.9980                | 0.9074         |
| IL2         | IL2RA       | 1m48_B                                                              | 0.9447                | 0.9940                   | 0.9980                | 0.8985         |
| IL2         | IL2RA       | 1m4a_A                                                              | 0.7358                | 0.9940                   | 0.9980                | 0.7688         |
| PTEN        | MAGI3       | 1be9_A                                                              | 0.9911                | 0.0000                   | 0.2251                | 0.7637         |
| MDM2        | TP53        | 1t4e_A                                                              | 0.9964                | 0.8004                   | 1.0000                | 0.9883         |
| MDM2        | TP53        | 1t4e_B                                                              | 0.9958                | 0.8004                   | 1.0000                | 0.9871         |
| MDM2        | TP53        | 1ttv_A                                                              | 0.9939                | 0.8004                   | 1.0000                | 0.9848         |
| MDM2        | TP53        | 3jzk_A                                                              | 0.9663                | 0.8004                   | 1.0000                | 0.9575         |
| MDM2        | TP53        | 3lbk_A                                                              | 0.9974                | 0.8004                   | 1.0000                | 0.9816         |
| MDM2        | TP53        | 3lbi_A                                                              | 0.9704                | 0.8004                   | 1.0000                | 0.9448         |
| MDM2        | TP53        | 3lbi_C                                                              | 0.9916                | 0.8004                   | 1.0000                | 0.9744         |
| MDM2        | TP53        | 3lbi_E                                                              | 0.9610                | 0.8004                   | 1.0000                | 0.9605         |
| MDM4        | TP53        | 3lbi_E                                                              | 0.9956                | 0.4991                   | 0.9981                | 0.9943         |
| PDGFRB      | PIK3R1      | 1h9o_A                                                              | 0.9636                | 0.9951                   | 0.9997                | 1.0000         |
| RAC1        | TIAM1       | 1foe_B                                                              | 0.8975                | 0.4991                   | 1.0000                | 0.9978         |
| RAC1        | TIAM1       | 1foe_D                                                              | 0.8895                | 0.4991                   | 1.0000                | 0.9978         |
| RAC1        | TIAM1       | 1foe_F                                                              | 0.9061                | 0.4991                   | 1.0000                | 0.9966         |
| RAC1        | TIAM1       | 1foe_H                                                              | 0.9508                | 0.4991                   | 1.0000                | 0.9954         |
| RAC1        | TRIO        | 2nz8_A                                                              | 0.9146                | 0.4991                   | 0.9980                | 0.9995         |
| RAF1        | YWHAZ       | 3rdh_A                                                              | 0.9201                | 0.4521                   | 0.9996                | 0.9850         |
| RAF1        | YWHAZ       | 3rdh_B                                                              | 0.8791                | 0.4521                   | 0.9996                | 0.9873         |
| RAF1        | YWHAZ       | 3rdh_C                                                              | 0.8529                | 0.4521                   | 0.9996                | 0.9861         |
| RAF1        | YWHAZ       | 3rdh_D                                                              | 0.8211                | 0.4521                   | 0.9996                | 0.9723         |
| S100B       | TP53        | 3hcm_A                                                              | 0.8769                | 0.8679                   | 0.9730                | 0.9304         |
| S100B       | TP53        | 3hcm_B                                                              | 0.7313                | 0.8679                   | 0.9730                | 0.9142         |
| STAT3       | STAT3       | 1bg1_A                                                              | 0.5700                | 0.0000                   | 1.0000                | 0.9517         |
| BIRC5       | BIRC5       | 1e31_A                                                              | 0.9929                | 0.0000                   | 0.9998                | 0.6917         |
| BIRC5       | BIRC5       | 1e31_B                                                              | 0.9950                | 0.0000                   | 0.9998                | 0.6768         |
| BIRC5       | BIRC5       | 1f3h_A                                                              | 0.9954                | 0.0000                   | 0.9998                | 0.6724         |
| BIRC5       | BIRC5       | 1f3h_B                                                              | 0.9970                | 0.0000                   | 0.9998                | 0.6732         |
| BIRC5       | BIRC5       | 1xox_A                                                              | 0.9941                | 0.0000                   | 0.9998                | 0.6986         |
| BIRC5       | BIRC5       | 1xox_B                                                              | 0.9923                | 0.0000                   | 0.9998                | 0.6974         |
| CTNNB1      | TCF7L1      | 1g3j_A                                                              | 0.9865                | 0.4991                   | 0.9996                | 0.9906         |
| CTNNB1      | TCF7L1      | 1g3j_C                                                              | 0.9784                | 0.4991                   | 0.9996                | 0.9925         |
| CTNNB1      | TCF7L2      | 1g3j_A                                                              | 0.9865                | 0.4991                   | 1.0000                | 0.9896         |
| CTNNB1      | TCF7L2      | 1g3j_C                                                              | 0.9784                | 0.4991                   | 1.0000                | 0.9928         |
| THRB        | NCOA2       | 1bsx_B                                                              | 0.9720                | 1.0000                   | 0.7517                | 0.7834         |
| TNF         | TNF         | 2az5_AB                                                             | 0.7129                | 0.9998                   | 1.0000                | 0.8896         |
| TNF         | TNF         | 2az5_CD                                                             | 0.7210                | 0.9998                   | 1.0000                | 0.8856         |
| XIAP        | CASP3       | 1i3o_E pocket1                                                      | 0.4319                | 0.9769                   | 0.9990                | 0.7893         |
| XIAP        | CASP3       | 1i3o_E pocket2                                                      | 0.5627                | 0.9769                   | 0.9990                | 0.8624         |
| XIAP        | CASP3       | 1i3o_F pocket3                                                      | 0.4088                | 0.9769                   | 0.9990                | 0.7930         |
| XIAP        | CASP3       | 1i3o_F pocket4                                                      | 0.4983                | 0.9769                   | 0.9990                | 0.8897         |
| XIAP        | CASP9       | 1tft_A                                                              | 0.8136                | 0.5387                   | 0.9926                | 0.9300         |
| XIAP        | CASP9       | 1nw9_A                                                              | 0.9305                | 0.5387                   | 0.9926                | 0.8778         |
| XIAP        | DIABLO      | 1g73_C                                                              | 0.8154                | 0.5387                   | 0.7883                | 0.8305         |
| XIAP        | DIABLO      | 1g73_D                                                              | 0.7672                | 0.5387                   | 0.7883                | 0.8391         |
| XIAP        | DIABLO      | 2opy_A                                                              | 0.9421                | 0.5387                   | 0.7883                | 0.8336         |
| CD247       | ZAP70       | 2oq1_A pocket1                                                      | 0.8303                | 0.7912                   | 0.8296                | 0.2915         |
| CD247       | ZAP70       | 2oq1_A pocket2                                                      | 0.2697                | 0.7912                   | 0.8296                | 0.4264         |

<sup>a</sup> For the details of the attributes and pocket-constituting amino acids of the positive instances used for our SVM-based method, see [http://www.drpias.net/positives\\_attributes.txt](http://www.drpias.net/positives_attributes.txt) and [http://www.drpias.net/positives\\_amino\\_acids.txt](http://www.drpias.net/positives_amino_acids.txt).

<sup>b</sup> Brefeldin-binding pocket.

<sup>c</sup> Target pocket in Viaud,J., Zeghouf,M., Barelli,H., Zee,J.C., Padilla,A., Guibert,B., Chardin,P., Royer,C.A., Cherfils,J. and Chavanieu,A. (2007) Structure-based discovery of an inhibitor of Arf activation by Sec7 domains through targeting of protein-protein complexes. *Proc. Natl. Acad. Sci. U. S. A.*, **104**, 10370-10375.

Table S2. Predicted highly druggable PPIs in Dr. PIAS.

| Interactor1 | Interactor2 | PDB entries used for detecting the pockets located on PPI interface | Druggability score    |                          |                       |                |
|-------------|-------------|---------------------------------------------------------------------|-----------------------|--------------------------|-----------------------|----------------|
|             |             |                                                                     | Structural attributes | Drug/chemical attributes | Functional attributes | All attributes |
| ABL1        | CRK         | 1ju5_C                                                              | 0.3825                | 0.4185                   | 0.6486                | 0.9122         |
| ARHGAP1     | CDC42       | 1am4_F                                                              | 0.4813                | 0.5387                   | 0.9547                | 0.9327         |
| BCL2L1      | BCL2L1      | 3ilb_N                                                              | 0.9646                | 0.7397                   | 0.9642                | 0.9110         |
| BRAF        | RAF1        | 3q96_A                                                              | 0.9704                | 0.6736                   | 0.9975                | 0.9209         |
| CALM1       | CAMK2G      | 1cm4_A                                                              | 0.9954                | 0.9968                   | 0.9942                | 0.9754         |
| CALM1       | CAMKK1      | 1ckk_A                                                              | 0.9944                | 0.9998                   | 0.8502                | 0.9865         |
| CALM1       | CAMKK2      | 1ckk_A                                                              | 0.9944                | 0.9998                   | 0.4493                | 0.9737         |
| CALM1       | GRIN1       | 3bya_A                                                              | 0.9969                | 0.8663                   | 0.4556                | 0.9663         |
| CALM1       | KCNN2       | 1g4y_R                                                              | 0.9478                | 0.9477                   | 0.2900                | 0.9423         |
| CALM1       | RYR1        | 2bcx_A                                                              | 0.9911                | 0.9544                   | 0.4977                | 0.9434         |
| CALM2       | MARCKS      | 1iwq_A                                                              | 0.9965                | 0.9998                   | 0.2820                | 0.9487         |
| CALM2       | MYO6        | 2vas_B                                                              | 0.9952                | 0.9998                   | 0.1739                | 0.9186         |
| CALM3       | CAMK2A      | 1cm4_A                                                              | 0.9954                | 0.9865                   | 0.9514                | 0.9844         |
| CALM3       | MARCKS      | 1iwq_A                                                              | 0.9965                | 0.9998                   | 0.2798                | 0.9524         |
| CALM3       | MYO6        | 2vas_B                                                              | 0.9952                | 0.9998                   | 0.1861                | 0.9213         |
| CDH1        | CTNNB1      | 1i7w_C                                                              | 0.9799                | 0.4991                   | 0.9974                | 0.9925         |
| CDH1        | JUP         | 3ifq_A                                                              | 0.8486                | 0.0000                   | 0.7726                | 0.9256         |
| CDH3        | CTNNB1      | 1i7w_C                                                              | 0.9799                | 0.4991                   | 0.4372                | 0.9727         |
| CTNNB1      | CTNNBIP1    | 1luj_A                                                              | 0.5249                | 0.4991                   | 0.4217                | 0.9469         |
| CTNNB1      | LEF1        | 3oux_A                                                              | 0.8720                | 0.4991                   | 0.9528                | 0.9661         |
| DOCK2       | RAC1        | 2yin_A                                                              | 0.9868                | 0.4991                   | 0.9802                | 0.9800         |
| EP300       | TP53        | 2k8f_A                                                              | 0.9227                | 0.4991                   | 0.9936                | 0.9259         |
| FKBP1A      | PPP3CA      | 1tco_C                                                              | 0.9110                | 0.7074                   | 0.9427                | 0.9222         |
| FKBP1A      | PPP3R1      | 1tco_C                                                              | 0.9110                | 0.7074                   | 0.8777                | 0.9104         |
| GRB2        | GRB2        | 3n7y_A                                                              | 0.9464                | 0.9961                   | 0.9724                | 0.9424         |
| GRB2        | VAV1        | 1gcq_C                                                              | 0.6600                | 0.7912                   | 0.9860                | 0.9323         |
| HRAS        | RASA1       | 1wq1_G                                                              | 0.5284                | 0.5691                   | 0.9955                | 0.9314         |
| MAPK14      | MAPKAPK2    | 2oza_A                                                              | 0.9730                | 0.6779                   | 0.9948                | 0.9373         |
| PAK1        | RAC1        | 2qme_A                                                              | 0.2748                | 0.4991                   | 0.9992                | 0.9205         |
| PAK2        | RAC1        | 2qme_A                                                              | 0.2748                | 0.4991                   | 0.9989                | 0.9144         |
| PRKACA      | PRKAR1A     | 2qcs_A                                                              | 0.6991                | 0.6077                   | 0.9940                | 0.9227         |
| PRKCE       | YWHAZ       | 2wh0_B                                                              | 0.9241                | 0.0000                   | 0.9387                | 0.9601         |
| RAC1        | ARFIP2      | 1i4t_D                                                              | 0.4861                | 0.4991                   | 0.8991                | 0.9208         |
| RAC1        | KALRN       | 2nz8_B                                                              | 0.5612                | 0.4991                   | 0.9856                | 0.9092         |
| RAC1        | VAV1        | 3bji_C                                                              | 0.9337                | 0.4991                   | 0.9857                | 0.9829         |
| RHOA        | ARHGDIA     | 1cc0_A                                                              | 0.8604                | 0.4991                   | 0.9886                | 0.9480         |
| RHOA        | ARHGEF11    | 3kz1_A                                                              | 0.8327                | 0.4991                   | 0.9632                | 0.9480         |
| RHOA        | ARHGEF12    | 1x86_G                                                              | 0.8101                | 0.4991                   | 0.9921                | 0.9605         |
| RHOA        | GEFT        | 2rgn_F                                                              | 0.8057                | 0.4991                   | 0.7973                | 0.9562         |
| RHOA        | MCF2L       | 1lb1_F                                                              | 0.8029                | 0.4991                   | 0.9758                | 0.9614         |
| RXRA        | NCOA1       | 1fm6_U                                                              | 0.6024                | 0.7966                   | 0.3540                | 0.9183         |

Table S3. Matrix of the similarities of the positive instances assessed by our SVM model using all attributes.<sup>a</sup>

[illegible]

When the druggability of a positive instance (in row) was assessed by our SVM-based method, the number of times each positive instance (in column) was located nearest to the assessed positive instance in a feature space was shown in a cell.

<sup>a</sup>For the details of the attributes and pocket-constituting amino acids of the positive instances used for our SVM-based method, see [http://www.drpias.net/positives\\_attributes.txt](http://www.drpias.net/positives_attributes.txt) and [http://www.drpias.net/positives\\_amino\\_acids.txt](http://www.drpias.net/positives_amino_acids.txt).

<sup>b</sup> Brefeldin-binding pocket.

<sup>6</sup> Target pocket in Viaud, J., Zeghouf, M., Barelli, H., Zee, J.C., Padilla, A., Guibert, B., Chardin, P., Royer, C.A., Cherfils, J. and Chavanieu, A. (2007) Structure-based discovery of an inhibitor of Arf activation by Sec7 domains through targeting of protein-protein complexes. *Proc. Natl. Acad. Sci. U. S. A.*, **104**, 10370-10375.

Table S3. (continued)

| No. | Interactor1 | Interactor2 | PDB entries used for detecting the pockets located on PPI interface | 29  | 30  | 31   | 32   | 33   | 34   | 35   | 36   | 37 | 38   | 39   | 40   | 41   | 42   | 43  | 44  | 45  | 46  | 47  | 48  | 49  | 50  | 51  | 52  | 53  | 54  | 55  | 56 |
|-----|-------------|-------------|---------------------------------------------------------------------|-----|-----|------|------|------|------|------|------|----|------|------|------|------|------|-----|-----|-----|-----|-----|-----|-----|-----|-----|-----|-----|-----|-----|----|
| 1   | ARF1        | CYTH2       | 1s9d_A <sup>a</sup>                                                 | 0   | 0   | 9    | 0    | 0    | 0    | 1    | 0    | 0  | 0    | 0    | 0    | 19   | 18   | 0   | 0   | 0   | 0   | 0   | 0   | 0   | 0   | 0   | 0   | 0   | 0   | 0   | 0  |
| 2   | ARF1        | CYTH2       | 1s9d_E <sup>b</sup>                                                 | 0   | 0   | 0    | 1    | 0    | 3    | 1    | 0    | 0  | 0    | 0    | 0    | 672  | 218  | 0   | 0   | 0   | 0   | 0   | 0   | 0   | 0   | 0   | 0   | 0   | 0   | 0   | 0  |
| 3   | ARF1        | CYTH2       | 1r8q_A <sup>b</sup>                                                 | 0   | 0   | 1    | 0    | 0    | 0    | 0    | 0    | 0  | 0    | 0    | 0    | 311  | 73   | 0   | 0   | 0   | 0   | 0   | 0   | 0   | 0   | 0   | 0   | 0   | 0   | 0   | 0  |
| 4   | ARF1        | CYTH2       | 1r8q_E <sup>b</sup>                                                 | 28  | 0   | 0    | 1    | 11   | 5    | 19   | 0    | 0  | 4    | 0    | 0    | 0    | 0    | 0   | 0   | 0   | 0   | 0   | 0   | 0   | 0   | 0   | 0   | 0   | 0   | 0   | 0  |
| 5   | ARF1        | CYTH2       | 1r8q_B <sup>b</sup>                                                 | 0   | 0   | 1    | 0    | 0    | 0    | 0    | 0    | 0  | 0    | 0    | 0    | 123  | 27   | 0   | 0   | 0   | 0   | 0   | 0   | 0   | 0   | 0   | 0   | 0   | 0   | 0   | 0  |
| 6   | ARF1        | CYTH2       | 1r8q_F <sup>b</sup>                                                 | 22  | 0   | 0    | 0    | 3    | 0    | 6    | 0    | 0  | 1    | 0    | 0    | 0    | 0    | 0   | 0   | 0   | 0   | 0   | 0   | 0   | 0   | 0   | 0   | 0   | 0   | 0   | 0  |
| 7   | ARF1        | CYTH2       | 1r8q_BF <sup>c</sup>                                                | 0   | 0   | 0    | 0    | 0    | 0    | 0    | 0    | 0  | 81   | 0    | 0    | 0    | 0    | 0   | 0   | 0   | 0   | 0   | 0   | 0   | 0   | 0   | 0   | 0   | 0   | 0   | 0  |
| 8   | ARF1        | CYTH2       | 1s9d_AE <sup>c</sup>                                                | 0   | 0   | 0    | 0    | 0    | 0    | 0    | 0    | 0  | 0    | 0    | 0    | 0    | 0    | 0   | 0   | 0   | 0   | 0   | 0   | 0   | 0   | 0   | 0   | 0   | 0   | 0   | 0  |
| 9   | ARF1        | CYTH2       | 1r8s_AE <sup>c</sup>                                                | 0   | 0   | 0    | 0    | 0    | 0    | 0    | 0    | 0  | 54   | 0    | 0    | 0    | 0    | 0   | 0   | 0   | 0   | 0   | 0   | 0   | 0   | 0   | 0   | 0   | 0   | 0   | 0  |
| 10  | ARF1        | CYTH1       | 1s9d_A <sup>b</sup>                                                 | 0   | 0   | 7    | 0    | 0    | 0    | 1    | 0    | 0  | 0    | 0    | 0    | 6    | 5    | 0   | 0   | 0   | 0   | 0   | 0   | 0   | 0   | 0   | 0   | 0   | 0   | 0   | 0  |
| 11  | ARF1        | CYTH1       | 1s9d_E <sup>b</sup>                                                 | 0   | 0   | 0    | 1    | 0    | 6    | 1    | 0    | 0  | 0    | 0    | 0    | 423  | 123  | 0   | 0   | 0   | 0   | 0   | 0   | 0   | 0   | 0   | 0   | 0   | 0   | 0   | 0  |
| 12  | ARF1        | CYTH1       | 1r8q_A <sup>b</sup>                                                 | 0   | 0   | 1    | 0    | 0    | 0    | 0    | 0    | 0  | 0    | 0    | 0    | 184  | 26   | 0   | 0   | 0   | 0   | 0   | 0   | 0   | 0   | 0   | 0   | 0   | 0   | 0   | 0  |
| 13  | ARF1        | CYTH1       | 1r8q_E <sup>b</sup>                                                 | 29  | 0   | 0    | 1    | 11   | 5    | 20   | 0    | 0  | 3    | 0    | 0    | 0    | 0    | 0   | 0   | 0   | 0   | 0   | 0   | 0   | 0   | 0   | 0   | 0   | 0   | 0   | 0  |
| 14  | ARF1        | CYTH1       | 1r8q_B <sup>b</sup>                                                 | 0   | 0   | 2    | 0    | 0    | 0    | 0    | 0    | 0  | 0    | 0    | 0    | 49   | 4    | 0   | 0   | 0   | 0   | 0   | 0   | 0   | 0   | 0   | 0   | 0   | 0   | 0   | 0  |
| 15  | ARF1        | CYTH1       | 1r8q_F <sup>b</sup>                                                 | 24  | 0   | 0    | 0    | 4    | 0    | 6    | 0    | 0  | 1    | 0    | 0    | 0    | 0    | 0   | 0   | 0   | 0   | 0   | 0   | 0   | 0   | 0   | 0   | 0   | 0   | 0   | 0  |
| 16  | ARF1        | CYTH1       | 1r8q_BF <sup>c</sup>                                                | 0   | 0   | 0    | 0    | 0    | 0    | 0    | 0    | 0  | 67   | 0    | 0    | 0    | 0    | 0   | 0   | 0   | 0   | 0   | 0   | 0   | 0   | 0   | 0   | 0   | 0   | 0   | 0  |
| 17  | ARF1        | CYTH1       | 1s9d_AE <sup>c</sup>                                                | 0   | 0   | 0    | 0    | 0    | 0    | 0    | 0    | 0  | 0    | 0    | 0    | 0    | 0    | 0   | 0   | 0   | 0   | 0   | 0   | 0   | 0   | 0   | 0   | 0   | 0   | 0   | 0  |
| 18  | ARF1        | CYTH1       | 1r8s_AE <sup>c</sup>                                                | 0   | 0   | 0    | 0    | 0    | 0    | 0    | 0    | 0  | 40   | 0    | 0    | 0    | 0    | 0   | 0   | 0   | 0   | 0   | 0   | 0   | 0   | 0   | 0   | 0   | 0   | 0   | 0  |
| 19  | BAK1        | BCL2        | 2o2f_A                                                              | 83  | 119 | 431  | 0    | 0    | 0    | 0    | 0    | 0  | 0    | 0    | 0    | 4    | 9    | 0   | 0   | 0   | 0   | 0   | 0   | 0   | 0   | 0   | 0   | 0   | 0   | 0   | 0  |
| 20  | BAK1        | BCL2        | 2o22_A                                                              | 102 | 120 | 413  | 0    | 0    | 0    | 0    | 0    | 0  | 0    | 0    | 0    | 2    | 0    | 0   | 0   | 0   | 0   | 0   | 0   | 0   | 0   | 0   | 0   | 0   | 0   | 0   | 0  |
| 21  | BAK1        | BCL2        | 2o21_A                                                              | 98  | 84  | 446  | 0    | 0    | 0    | 0    | 0    | 0  | 0    | 0    | 0    | 3    | 8    | 0   | 0   | 0   | 0   | 0   | 0   | 0   | 0   | 0   | 0   | 0   | 0   | 0   | 0  |
| 22  | BAK1        | BCL2        | 1ysw_A                                                              | 93  | 85  | 457  | 0    | 0    | 0    | 0    | 0    | 0  | 0    | 0    | 0    | 3    | 7    | 0   | 0   | 0   | 0   | 0   | 0   | 0   | 0   | 0   | 0   | 0   | 0   | 0   | 0  |
| 23  | BAK1        | BCL2L1      | 2o2n_A                                                              | 38  | 928 | 1437 | 0    | 0    | 0    | 0    | 0    | 0  | 0    | 0    | 0    | 0    | 0    | 0   | 0   | 0   | 0   | 0   | 0   | 0   | 0   | 0   | 0   | 0   | 0   | 0   | 0  |
| 24  | BAK1        | BCL2L1      | 2o2m_A                                                              | 62  | 370 | 1583 | 0    | 0    | 0    | 0    | 0    | 0  | 0    | 0    | 0    | 0    | 0    | 0   | 0   | 0   | 0   | 0   | 0   | 0   | 0   | 0   | 0   | 0   | 0   | 0   | 0  |
| 25  | BAK1        | BCL2L1      | 2yxj_A                                                              | 80  | 720 | 2573 | 0    | 0    | 0    | 0    | 0    | 0  | 1    | 0    | 0    | 0    | 0    | 0   | 0   | 0   | 0   | 0   | 0   | 0   | 0   | 0   | 0   | 0   | 0   | 0   | 0  |
| 26  | BAK1        | BCL2L1      | 2yxj_B                                                              | 43  | 729 | 2284 | 0    | 0    | 0    | 0    | 0    | 0  | 0    | 0    | 0    | 0    | 1    | 0   | 0   | 0   | 0   | 0   | 0   | 0   | 0   | 0   | 0   | 0   | 0   | 0   | 1  |
| 27  | BAK1        | BCL2L1      | 1ysi_A                                                              | 7   | 712 | 2205 | 0    | 0    | 0    | 0    | 0    | 0  | 0    | 0    | 0    | 0    | 0    | 0   | 0   | 0   | 0   | 0   | 0   | 0   | 0   | 0   | 0   | 0   | 0   | 0   | 0  |
| 28  | BAK1        | BCL2L1      | 2w3l_A                                                              | 983 | 81  | 272  | 0    | 1    | 1    | 9    | 0    | 0  | 0    | 0    | 0    | 4    | 4    | 0   | 0   | 0   | 0   | 0   | 0   | 0   | 0   | 0   | 0   | 0   | 0   | 0   | 0  |
| 29  | BAK1        | BCL2L1      | 2w3l_B                                                              | 991 | 52  | 288  | 0    | 2    | 1    | 10   | 0    | 0  | 0    | 0    | 0    | 2    | 1    | 0   | 0   | 0   | 0   | 0   | 0   | 0   | 0   | 0   | 0   | 0   | 0   | 0   | 0  |
| 30  | BAK1        | BCL2L1      | 3inq_A                                                              | 74  | 946 | 2039 | 0    | 0    | 0    | 0    | 0    | 0  | 0    | 0    | 0    | 4    | 6    | 0   | 0   | 0   | 0   | 0   | 0   | 0   | 0   | 0   | 0   | 0   | 0   | 0   | 1  |
| 31  | BAK1        | BCL2L1      | 3inq_B                                                              | 62  | 660 | 2683 | 0    | 0    | 0    | 0    | 0    | 0  | 0    | 0    | 0    | 0    | 0    | 0   | 0   | 0   | 0   | 0   | 0   | 0   | 0   | 0   | 0   | 0   | 0   | 0   | 1  |
| 32  | CALM1       | CAMK1       | 1mux_A pocket1                                                      | 50  | 0   | 0    | 3773 | 2178 | 2317 | 876  | 2    | 0  | 0    | 0    | 0    | 2    | 25   | 5   | 0   | 0   | 0   | 0   | 0   | 0   | 0   | 0   | 0   | 0   | 0   | 0   | 0  |
| 33  | CALM1       | CAMK1       | 1mux_A pocket2                                                      | 82  | 0   | 1    | 2523 | 3422 | 1825 | 1390 | 9    | 0  | 0    | 3    | 2    | 3    | 2    | 0   | 0   | 0   | 0   | 0   | 0   | 0   | 0   | 0   | 0   | 0   | 0   | 0   | 0  |
| 34  | CALM1       | MYLK        | 1mux_A pocket1                                                      | 55  | 0   | 0    | 1879 | 1449 | 4271 | 1605 | 0    | 0  | 0    | 0    | 0    | 53   | 15   | 0   | 0   | 0   | 0   | 0   | 0   | 0   | 0   | 0   | 0   | 0   | 0   | 0   | 0  |
| 35  | CALM1       | MYLK        | 1mux_A pocket2                                                      | 87  | 0   | 0    | 641  | 2696 | 3779 | 2106 | 1    | 0  | 0    | 0    | 0    | 26   | 9    | 0   | 0   | 0   | 0   | 0   | 0   | 0   | 0   | 0   | 0   | 0   | 0   | 0   | 0  |
| 36  | CALM1       | PDE1A       | 1qiv_A                                                              | 1   | 17  | 94   | 125  | 375  | 102  | 259  | 8014 | 0  | 0    | 0    | 0    | 11   | 6    | 0   | 0   | 0   | 0   | 0   | 0   | 0   | 0   | 0   | 0   | 0   | 0   | 0   | 0  |
| 37  | CD4         | HLA-DQB1    | 1j4_D                                                               | 0   | 0   | 0    | 0    | 0    | 0    | 0    | 0    | 0  | 9318 | 0    | 0    | 0    | 0    | 0   | 0   | 0   | 0   | 0   | 0   | 0   | 0   | 0   | 0   | 0   | 0   | 0   | 0  |
| 38  | CREBBP      | TP53        | 2d82_A                                                              | 2   | 2   | 3    | 0    | 0    | 0    | 0    | 0    | 0  | 9737 | 0    | 0    | 0    | 0    | 0   | 0   | 0   | 0   | 0   | 0   | 0   | 0   | 0   | 0   | 0   | 0   | 0   | 0  |
| 39  | ESR1        | NCOA2       | 3erd_A                                                              | 0   | 0   | 0    | 5    | 57   | 1    | 12   | 0    | 0  | 0    | 3525 | 2673 | 1    | 0    | 0   | 0   | 0   | 0   | 0   | 0   | 0   | 0   | 0   | 0   | 0   | 0   | 0   | 0  |
| 40  | ESR1        | NCOA2       | 3erd_B                                                              | 0   | 0   | 0    | 232  | 584  | 133  | 237  | 0    | 0  | 0    | 2807 | 3366 | 1    | 0    | 0   | 0   | 0   | 0   | 0   | 0   | 0   | 0   | 0   | 0   | 0   | 0   | 0   | 0  |
| 41  | FKBP1A      | TGFBP1      | 1fkj_A                                                              | 1   | 2   | 1    | 0    | 0    | 0    | 0    | 0    | 0  | 0    | 0    | 0    | 4264 | 2271 | 0   | 0   | 0   | 0   | 0   | 0   | 0   | 0   | 0   | 0   | 2   | 1   | 1   | 1  |
| 42  | FKBP1A      | TGFBP1      | 1fkf_A                                                              | 2   | 12  | 1    | 0    | 0    | 0    | 0    | 0    | 0  | 0    | 0    | 0    | 4117 | 2416 | 0   | 0   | 0   | 0   | 0   | 0   | 0   | 0   | 0   | 0   | 3   | 1   | 2   | 4  |
| 43  | EGFR        | GRB2        | 1qj1_B                                                              | 0   | 0   | 2    | 0    | 0    | 0    | 0    | 0    | 0  | 0    | 0    | 8    | 6    | 417  | 359 | 391 | 361 | 308 | 362 | 389 | 375 | 389 | 507 | 472 | 530 | 462 | 505 |    |
| 44  | EGFR        | GRB2        | 1qj1_C                                                              | 0   | 0   | 2    | 0    | 0    | 0    | 0    | 0    | 0  | 0    | 0    | 10   | 6    | 417  | 371 | 391 | 362 | 308 | 362 | 389 | 375 | 376 | 507 | 472 | 530 | 462 | 505 |    |
| 45  | EGFR        | GRB2        | 1qj1_D                                                              | 0   | 0   | 1    | 0    | 0    | 0    | 0    | 0    | 0  | 0    | 0    | 10   | 7    | 405  | 359 | 408 | 361 | 322 | 362 | 389 | 375 | 370 | 507 | 472 | 530 | 462 | 505 |    |
| 46  | EGFR        | GRB2        | 1qj1_E                                                              | 0   | 0   | 2    | 0    | 0    | 0    | 0    | 0    | 0  | 0    | 0    | 13   | 6    | 416  | 371 | 391 | 372 | 308 | 362 | 389 | 396 | 346 | 507 | 472 | 530 | 462 | 505 |    |
| 47  | EGFR        | GRB2        | 1qj1_F                                                              | 0   | 0   | 1    | 0    | 0    | 0    | 0    | 0    | 0  | 0    | 0    | 8    | 7    | 405  | 359 | 408 | 361 | 322 | 375 | 406 | 375 | 340 | 507 | 472 | 530 | 462 | 505 |    |
| 48  | EGFR        | GRB2        | 1qj1_G                                                              | 0   | 0   | 1    | 0    | 0    | 0    | 0    | 0    | 0  | 0    | 0    | 9    | 7    | 405  | 371 | 408 | 361 | 322 | 375 | 406 | 375 | 328 | 507 | 472 | 530 | 462 | 505 |    |
| 49  | EGFR        | GRB2        | 1qj1_H                                                              | 0   | 0   | 1    | 0    | 0    | 0    | 0    | 0    | 0  | 0    | 0    | 8    | 7    | 417  | 360 | 408 | 361 | 322 | 375 | 406 | 375 | 327 | 507 | 472 | 530 | 462 | 505 |    |
| 50  | EGFR        | GRB2        | 1qj1_I                                                              | 0   | 0   | 3    | 0    | 0    | 0    | 0    | 0    | 0  | 0    | 0    | 12   | 6    | 405  | 359 | 391 | 372 | 308 | 362 | 389 | 396 | 369 | 507 | 472 | 530 | 462 | 505 |    |
| 51  | EGFR        | GRB2        | 1qj1_J                                                              | 0   | 0   | 2    | 0    | 0    | 0    | 0    | 0    | 0  | 0    | 0    | 9    | 6    | 405  | 359 | 391 | 361 | 308 | 362 | 389 | 375 | 401 | 507 | 472 | 530 | 462 | 505 |    |
| 52  | GRB2        | MET         | 1qj1_B                                                              | 0   | 1   | 17   | 0    | 0    | 0    | 0    | 0    | 0  | 0    | 0    | 226  | 104  | 47   | 24  | 24  | 31  | 15  | 23  | 31  | 31  | 222 | 858 | 812 | 887 | 816 | 848 |    |
| 53  | GRB2        | MET         | 1qj1_C                                                              | 0   | 0   | 16   | 0    | 0    | 0    | 0    | 0    | 0  | 0    | 0    | 247  | 106  | 47   | 36  | 24  | 32  | 15  | 23  | 31  | 31  | 209 | 858 | 812 | 887 | 816 | 848 |    |
| 54  | GRB2        | MET         | 1qj1_D                                                              | 0   | 1   | 15   | 0    | 0    | 0    | 0    | 0    | 0  | 0    | 0    | 247  | 109  | 35   | 24  | 40  | 31  | 29  | 23  | 31  | 31  | 204 | 858 | 812 | 887 | 816 | 848 |    |
| 55  | GRB2        | MET         | 1qj1_E                                                              | 0   | 0   | 29   | 0    | 0    | 0    | 0    | 0    | 0  | 0    | 0    | 256  | 117  | 46   | 36  | 25  | 42  | 15  | 23  | 31  | 52  | 179 | 858 | 812 | 887 | 816 | 848 |    |
| 56  | GRB2        | MET         | 1qj1_F                                                              | 0   | 2   | 10   | 0    | 0    | 0    | 0    | 0    | 0  | 0    | 0    | 236  | 105  | 35   | 24  | 40  | 31  | 29  |     |     |     |     |     |     |     |     |     |    |

Table S3. (continued)

| No. | Interactor1 | Interactor2 | PDB entries used for detecting the pockets located on PPI interface | 57  | 58  | 59  | 60  | 61 | 62  | 63 | 64 | 65 | 66 | 67 | 68 | 69 | 70  | 71 | 72 | 73  | 74 | 75 | 76 | 77 | 78 | 79   | 80   | 81 | 82 | 83 | 84 |   |
|-----|-------------|-------------|---------------------------------------------------------------------|-----|-----|-----|-----|----|-----|----|----|----|----|----|----|----|-----|----|----|-----|----|----|----|----|----|------|------|----|----|----|----|---|
| 1   | ARF1        | CYTH2       | 1s9d_A <sup>a</sup>                                                 | 0   | 0   | 0   | 0   | 0  | 0   | 0  | 0  | 0  | 0  | 0  | 0  | 0  | 1   | 0  | 0  | 0   | 0  | 0  | 0  | 0  | 0  | 0    | 0    | 0  | 0  | 0  | 0  |   |
| 2   | ARF1        | CYTH2       | 1s9d_E <sup>b</sup>                                                 | 0   | 0   | 0   | 0   | 0  | 208 | 0  | 0  | 0  | 0  | 0  | 0  | 0  | 0   | 0  | 0  | 0   | 0  | 0  | 0  | 0  | 0  | 0    | 0    | 0  | 0  | 0  | 0  |   |
| 3   | ARF1        | CYTH2       | 1r8q_A <sup>b</sup>                                                 | 0   | 0   | 0   | 0   | 0  | 0   | 0  | 0  | 0  | 0  | 0  | 0  | 0  | 0   | 0  | 0  | 0   | 0  | 0  | 0  | 0  | 0  | 0    | 0    | 0  | 0  | 0  | 0  |   |
| 4   | ARF1        | CYTH2       | 1r8q_E <sup>b</sup>                                                 | 0   | 0   | 0   | 0   | 0  | 2   | 0  | 0  | 0  | 0  | 0  | 0  | 0  | 0   | 0  | 0  | 0   | 0  | 0  | 0  | 0  | 0  | 0    | 0    | 0  | 1  | 2  | 2  |   |
| 5   | ARF1        | CYTH2       | 1r8q_B <sup>b</sup>                                                 | 0   | 0   | 0   | 0   | 0  | 0   | 0  | 0  | 0  | 0  | 0  | 0  | 0  | 0   | 0  | 0  | 0   | 0  | 0  | 0  | 0  | 0  | 0    | 0    | 0  | 0  | 0  | 0  |   |
| 6   | ARF1        | CYTH2       | 1r8q_F <sup>b</sup>                                                 | 0   | 0   | 0   | 0   | 0  | 0   | 0  | 0  | 0  | 0  | 0  | 0  | 0  | 0   | 0  | 0  | 0   | 0  | 0  | 0  | 0  | 0  | 2    | 0    | 2  | 2  | 8  | 2  |   |
| 7   | ARF1        | CYTH2       | 1r8q_BF <sup>c</sup>                                                | 0   | 0   | 0   | 0   | 0  | 0   | 0  | 0  | 0  | 0  | 0  | 0  | 0  | 24  | 0  | 0  | 0   | 0  | 0  | 0  | 0  | 0  | 0    | 0    | 0  | 0  | 0  | 0  |   |
| 8   | ARF1        | CYTH2       | 1s9d_AE <sup>c</sup>                                                | 0   | 0   | 0   | 0   | 0  | 0   | 0  | 0  | 0  | 0  | 0  | 0  | 0  | 268 | 0  | 0  | 0   | 0  | 0  | 0  | 0  | 0  | 0    | 0    | 0  | 0  | 0  | 0  |   |
| 9   | ARF1        | CYTH2       | 1r8s_AE <sup>c</sup>                                                | 0   | 0   | 0   | 0   | 0  | 0   | 0  | 0  | 0  | 0  | 0  | 0  | 0  | 118 | 0  | 0  | 0   | 0  | 0  | 0  | 0  | 0  | 0    | 0    | 0  | 0  | 0  | 0  |   |
| 10  | ARF1        | CYTH1       | 1s9d_A <sup>b</sup>                                                 | 0   | 0   | 0   | 0   | 0  | 0   | 0  | 0  | 0  | 0  | 0  | 0  | 0  | 2   | 0  | 0  | 0   | 0  | 0  | 0  | 0  | 0  | 0    | 0    | 0  | 0  | 0  | 0  |   |
| 11  | ARF1        | CYTH1       | 1s9d_E <sup>b</sup>                                                 | 0   | 0   | 0   | 0   | 0  | 393 | 0  | 0  | 0  | 0  | 0  | 0  | 0  | 0   | 0  | 0  | 0   | 0  | 0  | 0  | 0  | 0  | 0    | 0    | 0  | 0  | 0  | 0  |   |
| 12  | ARF1        | CYTH1       | 1r8q_A <sup>b</sup>                                                 | 0   | 0   | 0   | 0   | 0  | 0   | 0  | 0  | 0  | 0  | 0  | 0  | 0  | 0   | 0  | 0  | 0   | 0  | 0  | 0  | 0  | 0  | 0    | 0    | 0  | 0  | 0  | 0  |   |
| 13  | ARF1        | CYTH1       | 1r8q_E <sup>b</sup>                                                 | 0   | 0   | 0   | 0   | 0  | 3   | 0  | 0  | 0  | 0  | 0  | 0  | 0  | 0   | 0  | 0  | 0   | 0  | 0  | 0  | 0  | 0  | 0    | 0    | 0  | 1  | 2  | 1  |   |
| 14  | ARF1        | CYTH1       | 1r8q_B <sup>b</sup>                                                 | 0   | 0   | 0   | 0   | 0  | 0   | 0  | 0  | 0  | 0  | 0  | 0  | 0  | 0   | 0  | 0  | 0   | 0  | 0  | 0  | 0  | 0  | 0    | 0    | 0  | 0  | 0  | 0  |   |
| 15  | ARF1        | CYTH1       | 1r8q_F <sup>b</sup>                                                 | 0   | 0   | 0   | 0   | 0  | 1   | 0  | 0  | 0  | 0  | 0  | 0  | 0  | 0   | 0  | 0  | 0   | 0  | 0  | 0  | 0  | 0  | 2    | 0    | 3  | 2  | 8  | 2  |   |
| 16  | ARF1        | CYTH1       | 1r8q_BF <sup>c</sup>                                                | 0   | 0   | 0   | 0   | 0  | 0   | 0  | 0  | 0  | 0  | 0  | 0  | 0  | 42  | 0  | 0  | 0   | 0  | 0  | 0  | 0  | 0  | 0    | 0    | 0  | 0  | 0  | 0  |   |
| 17  | ARF1        | CYTH1       | 1s9d_AE <sup>c</sup>                                                | 0   | 0   | 0   | 0   | 0  | 0   | 0  | 0  | 0  | 0  | 0  | 0  | 0  | 306 | 0  | 0  | 0   | 0  | 0  | 0  | 0  | 0  | 0    | 0    | 0  | 0  | 0  | 0  |   |
| 18  | ARF1        | CYTH1       | 1r8s_AE <sup>c</sup>                                                | 0   | 0   | 0   | 0   | 0  | 0   | 0  | 0  | 0  | 0  | 0  | 0  | 0  | 172 | 0  | 0  | 0   | 0  | 0  | 0  | 0  | 0  | 0    | 0    | 0  | 0  | 0  | 0  |   |
| 19  | BAK1        | BCL2        | 2o2f_A                                                              | 0   | 0   | 0   | 0   | 0  | 0   | 0  | 0  | 0  | 0  | 0  | 0  | 0  | 12  | 0  | 0  | 0   | 0  | 0  | 0  | 0  | 0  | 0    | 0    | 0  | 0  | 0  | 0  |   |
| 20  | BAK1        | BCL2        | 2o22_A                                                              | 0   | 0   | 0   | 0   | 0  | 0   | 0  | 0  | 0  | 0  | 0  | 0  | 0  | 50  | 0  | 0  | 0   | 0  | 0  | 0  | 0  | 0  | 0    | 0    | 0  | 0  | 0  | 0  |   |
| 21  | BAK1        | BCL2        | 2o21_A                                                              | 0   | 0   | 0   | 0   | 0  | 0   | 0  | 0  | 0  | 0  | 0  | 0  | 0  | 13  | 0  | 0  | 0   | 0  | 0  | 0  | 0  | 0  | 0    | 0    | 0  | 0  | 0  | 0  |   |
| 22  | BAK1        | BCL2        | 1ysw_A                                                              | 0   | 0   | 0   | 0   | 0  | 0   | 0  | 0  | 0  | 0  | 0  | 0  | 0  | 9   | 0  | 0  | 0   | 0  | 0  | 0  | 0  | 0  | 0    | 0    | 0  | 0  | 0  | 0  |   |
| 23  | BAK1        | BCL2L1      | 2o2n_A                                                              | 0   | 0   | 0   | 0   | 0  | 0   | 0  | 0  | 0  | 0  | 0  | 0  | 0  | 130 | 0  | 0  | 0   | 0  | 0  | 0  | 0  | 0  | 0    | 0    | 0  | 0  | 0  | 0  |   |
| 24  | BAK1        | BCL2L1      | 2o2m_A                                                              | 0   | 0   | 0   | 0   | 0  | 1   | 0  | 0  | 0  | 0  | 0  | 0  | 0  | 67  | 0  | 0  | 0   | 0  | 0  | 0  | 0  | 0  | 0    | 0    | 0  | 0  | 0  | 0  |   |
| 25  | BAK1        | BCL2L1      | 2yxj_A                                                              | 0   | 0   | 0   | 0   | 0  | 0   | 0  | 0  | 0  | 0  | 0  | 0  | 0  | 87  | 0  | 0  | 0   | 0  | 0  | 0  | 0  | 0  | 0    | 0    | 0  | 0  | 0  | 0  |   |
| 26  | BAK1        | BCL2L1      | 2yxj_B                                                              | 0   | 0   | 0   | 0   | 0  | 0   | 0  | 0  | 0  | 0  | 0  | 0  | 0  | 92  | 0  | 0  | 0   | 0  | 0  | 0  | 0  | 0  | 0    | 0    | 0  | 0  | 0  | 0  |   |
| 27  | BAK1        | BCL2L1      | 1ysi_A                                                              | 0   | 0   | 0   | 0   | 0  | 0   | 0  | 0  | 0  | 0  | 0  | 0  | 0  | 181 | 0  | 0  | 0   | 0  | 0  | 0  | 0  | 0  | 0    | 0    | 0  | 0  | 0  | 0  |   |
| 28  | BAK1        | BCL2L1      | 2w3l_A                                                              | 0   | 0   | 0   | 0   | 0  | 0   | 0  | 0  | 0  | 0  | 0  | 0  | 0  | 15  | 0  | 0  | 0   | 0  | 0  | 0  | 0  | 0  | 0    | 1    | 0  | 0  | 0  | 0  |   |
| 29  | BAK1        | BCL2L1      | 2w3l_B                                                              | 0   | 0   | 0   | 0   | 0  | 0   | 0  | 0  | 0  | 0  | 0  | 0  | 0  | 49  | 0  | 0  | 0   | 0  | 0  | 0  | 0  | 0  | 0    | 1    | 0  | 0  | 0  | 0  |   |
| 30  | BAK1        | BCL2L1      | 3inq_A                                                              | 0   | 0   | 0   | 0   | 0  | 0   | 0  | 0  | 0  | 0  | 0  | 0  | 0  | 50  | 0  | 0  | 0   | 0  | 0  | 0  | 0  | 0  | 0    | 0    | 0  | 0  | 0  | 0  |   |
| 31  | BAK1        | BCL2L1      | 3inq_B                                                              | 0   | 0   | 0   | 0   | 0  | 0   | 0  | 0  | 0  | 0  | 0  | 0  | 0  | 54  | 0  | 0  | 0   | 0  | 0  | 0  | 0  | 0  | 0    | 0    | 0  | 0  | 0  | 0  |   |
| 32  | CALM1       | CAMK1       | 1mux_A pocket1                                                      | 0   | 0   | 0   | 0   | 0  | 0   | 0  | 0  | 0  | 0  | 0  | 0  | 0  | 2   | 0  | 0  | 0   | 0  | 0  | 8  | 7  | 1  | 59   | 0    | 0  | 0  | 0  | 0  |   |
| 33  | CALM1       | CAMK1       | 1mux_A pocket2                                                      | 0   | 0   | 0   | 0   | 0  | 2   | 0  | 0  | 0  | 0  | 0  | 0  | 0  | 45  | 0  | 0  | 0   | 0  | 0  | 0  | 0  | 0  | 101  | 0    | 0  | 0  | 0  | 0  |   |
| 34  | CALM1       | MYLK        | 1mux_A pocket1                                                      | 0   | 0   | 0   | 0   | 0  | 0   | 0  | 0  | 0  | 0  | 0  | 0  | 0  | 1   | 1  | 0  | 0   | 0  | 1  | 17 | 7  | 1  | 78   | 0    | 0  | 0  | 0  | 0  |   |
| 35  | CALM1       | MYLK        | 1mux_A pocket2                                                      | 0   | 0   | 0   | 0   | 0  | 0   | 0  | 0  | 0  | 0  | 0  | 0  | 0  | 32  | 0  | 0  | 0   | 0  | 0  | 2  | 0  | 0  | 176  | 0    | 0  | 0  | 0  | 0  |   |
| 36  | CALM1       | PDE1A       | 1qiv_A                                                              | 0   | 0   | 0   | 0   | 0  | 0   | 0  | 0  | 0  | 0  | 0  | 0  | 0  | 0   | 0  | 0  | 0   | 0  | 0  | 0  | 0  | 0  | 5    | 0    | 0  | 0  | 0  | 0  |   |
| 37  | CD4         | HLA-DQB1    | 1j4_D                                                               | 0   | 0   | 0   | 0   | 0  | 0   | 0  | 0  | 0  | 0  | 0  | 0  | 0  | 15  | 1  | 0  | 2   | 0  | 0  | 0  | 0  | 0  | 61   | 0    | 0  | 0  | 0  | 0  |   |
| 38  | CREBBP      | TP53        | 2d82_A                                                              | 0   | 0   | 0   | 0   | 0  | 0   | 0  | 0  | 0  | 0  | 0  | 0  | 0  | 0   | 0  | 0  | 0   | 0  | 0  | 0  | 0  | 0  | 1    | 0    | 0  | 0  | 0  | 0  |   |
| 39  | ESR1        | NCOA2       | 3erd_A                                                              | 0   | 0   | 0   | 0   | 0  | 0   | 0  | 0  | 0  | 0  | 0  | 0  | 0  | 0   | 0  | 0  | 0   | 0  | 0  | 0  | 0  | 0  | 0    | 0    | 0  | 0  | 0  | 0  |   |
| 40  | ESR1        | NCOA2       | 3erd_B                                                              | 0   | 0   | 0   | 0   | 0  | 0   | 0  | 0  | 0  | 0  | 0  | 0  | 0  | 0   | 0  | 0  | 0   | 0  | 0  | 0  | 0  | 0  | 0    | 0    | 0  | 0  | 0  | 0  |   |
| 41  | FKBP1A      | TGFB1       | 1fkj_A                                                              | 1   | 0   | 0   | 2   | 0  | 0   | 0  | 0  | 0  | 0  | 0  | 0  | 0  | 0   | 9  | 14 | 106 | 3  | 4  | 1  | 3  | 2  | 1321 | 0    | 0  | 0  | 0  | 0  | 0 |
| 42  | FKBP1A      | TGFB1       | 1fkf_A                                                              | 1   | 0   | 1   | 3   | 0  | 0   | 0  | 0  | 0  | 0  | 0  | 0  | 0  | 0   | 7  | 8  | 67  | 3  | 2  | 0  | 3  | 0  | 818  | 0    | 0  | 0  | 0  | 0  | 0 |
| 43  | EGFR        | GRB2        | 1qj_B                                                               | 448 | 468 | 507 | 262 | 0  | 1   | 0  | 0  | 0  | 0  | 0  | 0  | 0  | 1   | 0  | 1  | 1   | 0  | 0  | 0  | 1  | 0  | 1    | 1153 | 0  | 0  | 0  | 0  | 0 |
| 44  | EGFR        | GRB2        | 1qj_C                                                               | 448 | 468 | 507 | 262 | 0  | 1   | 0  | 0  | 0  | 0  | 0  | 0  | 0  | 1   | 0  | 1  | 1   | 0  | 0  | 0  | 1  | 0  | 1    | 1153 | 0  | 0  | 0  | 0  | 0 |
| 45  | EGFR        | GRB2        | 1qj_D                                                               | 448 | 468 | 507 | 262 | 0  | 1   | 0  | 0  | 0  | 0  | 0  | 0  | 0  | 1   | 0  | 1  | 1   | 0  | 0  | 0  | 0  | 0  | 1    | 1146 | 0  | 0  | 1  | 0  | 0 |
| 46  | EGFR        | GRB2        | 1qj_E                                                               | 448 | 468 | 507 | 261 | 0  | 2   | 0  | 0  | 0  | 0  | 0  | 0  | 0  | 1   | 0  | 1  | 1   | 0  | 0  | 0  | 1  | 0  | 1    | 1155 | 0  | 0  | 0  | 0  | 0 |
| 47  | EGFR        | GRB2        | 1qj_F                                                               | 448 | 468 | 507 | 262 | 0  | 1   | 0  | 0  | 0  | 0  | 0  | 0  | 0  | 1   | 0  | 1  | 1   | 0  | 0  | 0  | 0  | 0  | 1    | 1125 | 0  | 0  | 1  | 0  | 0 |
| 48  | EGFR        | GRB2        | 1qj_G                                                               | 448 | 468 | 506 | 262 | 0  | 1   | 0  | 0  | 0  | 0  | 0  | 0  | 0  | 1   | 0  | 1  | 1   | 0  | 0  | 0  | 0  | 0  | 1    | 1118 | 0  | 0  | 1  | 0  | 0 |
| 49  | EGFR        | GRB2        | 1qj_H                                                               | 448 | 468 | 506 | 262 | 0  | 1   | 0  | 0  | 0  | 0  | 0  | 0  | 0  | 1   | 0  | 1  | 1   | 0  | 0  | 0  | 0  | 0  | 1    | 1087 | 0  | 0  | 1  | 0  | 0 |
| 50  | EGFR        | GRB2        | 1qj_I                                                               | 448 | 468 | 507 | 262 | 0  | 2   | 0  | 0  | 0  | 0  | 0  | 0  | 0  | 1   | 0  | 1  | 2   | 0  | 1  | 0  | 1  | 0  | 1    | 1160 | 0  | 0  | 0  | 0  | 0 |
| 51  | EGFR        | GRB2        | 1qj_J                                                               | 448 | 468 | 507 | 262 | 0  | 1   | 0  | 0  | 0  | 0  | 0  | 0  | 0  | 1   | 0  | 1  | 1   | 0  | 0  | 0  | 1  | 0  | 1    | 1154 | 0  | 0  | 0  | 0  | 0 |
| 52  | GRB2        | MET         | 1qj_B                                                               | 782 | 798 | 857 | 414 | 0  | 0   | 0  | 0  | 0  | 0  | 0  | 0  | 0  | 4   | 0  | 0  | 0   | 0  | 0  | 0  | 0  | 0  | 4    | 1156 | 1  | 0  | 0  | 0  |   |
| 53  | GRB2        | MET         | 1qj_C                                                               | 782 | 798 | 857 | 414 | 0  | 0   | 0  | 0  | 0  | 0  | 0  | 0  | 0  | 2   | 0  | 0  | 0   | 0  | 0  | 0  | 0  | 0  | 4    | 1153 | 1  | 0  | 0  | 0  | 0 |
| 54  | GRB2        | MET         | 1qj_D                                                               | 782 | 798 | 857 | 414 | 0  | 0   | 0  | 0  | 0  | 0  | 0  | 0  | 0  | 2   | 0  | 0  | 1   | 0  | 0  | 0  | 0  | 0  | 3    | 1146 | 1  | 0  | 0  | 0  | 0 |
| 55  | GRB2        | MET         | 1qj_E                                                               | 782 | 798 | 857 | 414 | 0  | 0   | 0  | 0  | 0  | 0  | 0  | 0  | 0  | 11  | 1  | 0  | 0   | 0  | 0  | 0  | 0  | 0  | 12   | 1159 | 0  | 0  | 0  | 0  | 0 |
| 56  | GRB2        | MET         | 1qj_F                                                               | 782 | 798 | 857 | 414 | 0  | 0   | 0  | 0  | 0  | 0  | 0  | 0  | 0  | 1   | 0  | 0  | 1   | 0  | 0  | 0  | 0  | 0  | 4    | 1137 | 1  | 0  | 0  | 0  | 0 |
| 57  | GRB2        | MET         | 1qj_G                                                               | 782 | 798 | 857 | 414 | 0  | 0   | 0  | 0  | 0  | 0  | 0  | 0  | 0  | 1   | 0  | 0  | 1   | 0  | 0  | 0  | 0  | 0  | 4    | 1122 | 1  | 0  | 0  | 0  |   |

Table S3. (continued)

| No. | Interactor1 | Interactor2 | PDB entries used for detecting the pockets located on PPI interface | 85  | 86 | 87 | 88 | 89 | 90  | 91 | 92   | 93 | 94 | 95 | 96 | 97 | 98 | 99 | 100 | 101 | 102 | 103  | 104 | 105 | 106 | 107 | 108 | 109 | 110 | 111 | 112 |   |
|-----|-------------|-------------|---------------------------------------------------------------------|-----|----|----|----|----|-----|----|------|----|----|----|----|----|----|----|-----|-----|-----|------|-----|-----|-----|-----|-----|-----|-----|-----|-----|---|
| 1   | ARF1        | CYTH2       | 1s9d_A <sup>a</sup>                                                 | 13  | 3  | 2  | 0  | 0  | 0   | 0  | 0    | 0  | 0  | 0  | 0  | 0  | 0  | 0  | 0   | 0   | 0   | 0    | 0   | 0   | 0   | 0   | 0   | 0   | 212 | 440 | 3   |   |
| 2   | ARF1        | CYTH2       | 1s9d_E <sup>b</sup>                                                 | 0   | 0  | 0  | 0  | 0  | 1   | 0  | 0    | 0  | 0  | 0  | 0  | 0  | 0  | 0  | 0   | 0   | 0   | 0    | 0   | 0   | 0   | 0   | 0   | 0   | 0   | 0   | 0   |   |
| 3   | ARF1        | CYTH2       | 1r8q_A <sup>b</sup>                                                 | 67  | 0  | 0  | 0  | 0  | 0   | 0  | 0    | 0  | 0  | 0  | 0  | 0  | 0  | 0  | 0   | 0   | 0   | 0    | 0   | 0   | 0   | 0   | 0   | 0   | 6   | 559 | 119 |   |
| 4   | ARF1        | CYTH2       | 1r8q_E <sup>b</sup>                                                 | 246 | 0  | 0  | 0  | 0  | 620 | 22 | 0    | 0  | 0  | 0  | 0  | 0  | 0  | 0  | 0   | 0   | 0   | 0    | 0   | 0   | 0   | 0   | 0   | 0   | 0   | 1   | 142 |   |
| 5   | ARF1        | CYTH2       | 1r8q_B <sup>b</sup>                                                 | 317 | 0  | 0  | 0  | 0  | 0   | 0  | 0    | 0  | 0  | 0  | 0  | 0  | 0  | 0  | 0   | 0   | 0   | 0    | 0   | 0   | 0   | 0   | 0   | 0   | 12  | 557 | 101 |   |
| 6   | ARF1        | CYTH2       | 1r8q_F <sup>b</sup>                                                 | 362 | 0  | 0  | 0  | 0  | 611 | 24 | 0    | 0  | 0  | 0  | 0  | 0  | 0  | 0  | 0   | 0   | 0   | 0    | 0   | 0   | 0   | 0   | 0   | 0   | 0   | 2   | 41  |   |
| 7   | ARF1        | CYTH2       | 1r8q_BF <sup>c</sup>                                                | 0   | 1  | 0  | 2  | 1  | 0   | 0  | 0    | 0  | 0  | 0  | 0  | 0  | 0  | 15 | 0   | 5   | 0   | 0    | 0   | 0   | 0   | 0   | 0   | 0   | 27  | 0   | 0   |   |
| 8   | ARF1        | CYTH2       | 1s9d_AE <sup>c</sup>                                                | 0   | 0  | 0  | 0  | 0  | 0   | 0  | 0    | 0  | 0  | 0  | 0  | 0  | 0  | 0  | 0   | 0   | 0   | 0    | 0   | 0   | 0   | 0   | 0   | 0   | 0   | 0   | 0   |   |
| 9   | ARF1        | CYTH2       | 1r8s_AE <sup>c</sup>                                                | 0   | 1  | 1  | 10 | 0  | 0   | 0  | 0    | 0  | 0  | 0  | 0  | 0  | 16 | 3  | 1   | 0   | 0   | 0    | 0   | 0   | 0   | 0   | 0   | 0   | 89  | 3   | 0   |   |
| 10  | ARF1        | CYTH1       | 1s9d_A <sup>b</sup>                                                 | 11  | 2  | 1  | 0  | 0  | 0   | 0  | 0    | 0  | 0  | 0  | 0  | 0  | 0  | 0  | 0   | 0   | 0   | 0    | 0   | 0   | 0   | 0   | 0   | 0   | 221 | 438 | 3   |   |
| 11  | ARF1        | CYTH1       | 1s9d_E <sup>b</sup>                                                 | 0   | 0  | 0  | 0  | 0  | 1   | 0  | 0    | 0  | 0  | 0  | 0  | 0  | 0  | 0  | 0   | 0   | 0   | 0    | 0   | 0   | 0   | 0   | 0   | 0   | 0   | 0   | 0   |   |
| 12  | ARF1        | CYTH1       | 1r8q_A <sup>b</sup>                                                 | 60  | 0  | 0  | 0  | 0  | 0   | 0  | 0    | 0  | 0  | 0  | 0  | 0  | 0  | 0  | 0   | 0   | 0   | 0    | 0   | 0   | 0   | 0   | 0   | 0   | 7   | 515 | 145 |   |
| 13  | ARF1        | CYTH1       | 1r8q_E <sup>b</sup>                                                 | 222 | 0  | 0  | 0  | 0  | 610 | 38 | 0    | 0  | 0  | 0  | 0  | 0  | 0  | 0  | 0   | 0   | 0   | 0    | 0   | 0   | 0   | 0   | 0   | 0   | 0   | 1   | 135 |   |
| 14  | ARF1        | CYTH1       | 1r8q_B <sup>b</sup>                                                 | 289 | 0  | 0  | 0  | 0  | 0   | 0  | 0    | 0  | 0  | 0  | 0  | 0  | 0  | 0  | 0   | 0   | 0   | 0    | 0   | 0   | 0   | 0   | 0   | 0   | 10  | 505 | 105 |   |
| 15  | ARF1        | CYTH1       | 1r8q_F <sup>b</sup>                                                 | 335 | 0  | 0  | 0  | 0  | 594 | 34 | 0    | 0  | 0  | 0  | 0  | 0  | 0  | 0  | 0   | 0   | 0   | 0    | 0   | 0   | 0   | 0   | 0   | 0   | 0   | 1   | 36  |   |
| 16  | ARF1        | CYTH1       | 1r8q_BF <sup>c</sup>                                                | 0   | 1  | 0  | 0  | 0  | 0   | 0  | 0    | 0  | 0  | 0  | 0  | 0  | 0  | 25 | 2   | 5   | 0   | 0    | 0   | 0   | 0   | 0   | 0   | 0   | 26  | 0   | 0   |   |
| 17  | ARF1        | CYTH1       | 1s9d_AE <sup>c</sup>                                                | 0   | 0  | 0  | 0  | 0  | 0   | 0  | 0    | 0  | 0  | 0  | 0  | 0  | 0  | 0  | 0   | 0   | 0   | 0    | 0   | 0   | 0   | 0   | 0   | 0   | 0   | 0   | 0   |   |
| 18  | ARF1        | CYTH1       | 1r8s_AE <sup>c</sup>                                                | 0   | 1  | 1  | 7  | 0  | 0   | 0  | 0    | 0  | 0  | 0  | 0  | 0  | 0  | 20 | 6   | 1   | 0   | 0    | 0   | 0   | 0   | 0   | 0   | 0   | 77  | 3   | 0   |   |
| 19  | BAK1        | BCL2        | 2o2f_A                                                              | 0   | 0  | 0  | 0  | 0  | 0   | 1  | 0    | 0  | 0  | 0  | 0  | 0  | 0  | 0  | 0   | 0   | 0   | 0    | 0   | 0   | 0   | 0   | 0   | 0   | 1   | 4   | 0   |   |
| 20  | BAK1        | BCL2        | 2o22_A                                                              | 0   | 0  | 0  | 0  | 0  | 0   | 0  | 0    | 0  | 0  | 0  | 0  | 0  | 0  | 0  | 0   | 0   | 0   | 0    | 0   | 0   | 0   | 0   | 0   | 0   | 0   | 0   | 0   |   |
| 21  | BAK1        | BCL2        | 2o21_A                                                              | 0   | 0  | 0  | 0  | 0  | 0   | 5  | 0    | 0  | 0  | 0  | 0  | 0  | 0  | 0  | 0   | 0   | 0   | 0    | 0   | 0   | 0   | 0   | 0   | 0   | 0   | 0   | 0   |   |
| 22  | BAK1        | BCL2        | 1ysw_A                                                              | 0   | 0  | 0  | 0  | 0  | 0   | 6  | 0    | 0  | 0  | 0  | 0  | 0  | 0  | 0  | 0   | 0   | 0   | 0    | 1   | 0   | 0   | 0   | 0   | 0   | 0   | 1   | 0   |   |
| 23  | BAK1        | BCL2L1      | 2o2n_A                                                              | 0   | 0  | 0  | 0  | 0  | 0   | 0  | 0    | 0  | 0  | 0  | 0  | 0  | 0  | 0  | 0   | 0   | 0   | 0    | 0   | 0   | 0   | 0   | 0   | 0   | 0   | 0   | 0   |   |
| 24  | BAK1        | BCL2L1      | 2o2m_A                                                              | 0   | 0  | 0  | 0  | 0  | 0   | 0  | 0    | 0  | 0  | 0  | 0  | 0  | 0  | 0  | 0   | 0   | 0   | 0    | 0   | 0   | 0   | 0   | 0   | 0   | 0   | 0   | 0   |   |
| 25  | BAK1        | BCL2L1      | 2yxj_A                                                              | 0   | 0  | 0  | 0  | 0  | 0   | 0  | 0    | 0  | 0  | 0  | 0  | 0  | 0  | 0  | 0   | 0   | 0   | 0    | 0   | 0   | 0   | 0   | 0   | 0   | 0   | 0   | 0   |   |
| 26  | BAK1        | BCL2L1      | 2yxj_B                                                              | 0   | 0  | 0  | 0  | 0  | 0   | 0  | 0    | 0  | 0  | 0  | 0  | 0  | 0  | 0  | 0   | 0   | 0   | 0    | 0   | 0   | 0   | 0   | 0   | 0   | 0   | 0   | 0   |   |
| 27  | BAK1        | BCL2L1      | 1ysi_A                                                              | 0   | 0  | 0  | 0  | 0  | 0   | 0  | 0    | 0  | 0  | 0  | 0  | 0  | 0  | 0  | 0   | 0   | 0   | 0    | 0   | 0   | 0   | 0   | 0   | 0   | 0   | 0   | 0   |   |
| 28  | BAK1        | BCL2L1      | 2w3l_A                                                              | 0   | 0  | 0  | 0  | 0  | 25  | 11 | 0    | 0  | 0  | 0  | 0  | 0  | 0  | 0  | 0   | 0   | 0   | 0    | 0   | 0   | 0   | 0   | 0   | 0   | 0   | 0   | 0   |   |
| 29  | BAK1        | BCL2L1      | 2w3l_B                                                              | 0   | 0  | 0  | 0  | 0  | 9   | 3  | 0    | 0  | 0  | 0  | 0  | 0  | 0  | 0  | 0   | 0   | 0   | 0    | 0   | 0   | 0   | 0   | 0   | 0   | 0   | 0   | 0   |   |
| 30  | BAK1        | BCL2L1      | 3inq_A                                                              | 0   | 0  | 0  | 0  | 0  | 0   | 0  | 0    | 0  | 0  | 0  | 0  | 0  | 0  | 0  | 0   | 0   | 0   | 0    | 0   | 0   | 0   | 0   | 0   | 0   | 0   | 0   | 0   |   |
| 31  | BAK1        | BCL2L1      | 3inq_B                                                              | 0   | 0  | 0  | 0  | 0  | 1   | 0  | 0    | 0  | 0  | 0  | 0  | 0  | 0  | 0  | 0   | 0   | 0   | 0    | 0   | 0   | 0   | 0   | 0   | 0   | 0   | 0   | 0   |   |
| 32  | CALM1       | CAMK1       | 1mux_A pocket1                                                      | 0   | 0  | 0  | 0  | 0  | 198 | 64 | 0    | 0  | 0  | 0  | 0  | 0  | 0  | 0  | 0   | 0   | 0   | 6    | 0   | 0   | 0   | 0   | 0   | 0   | 0   | 0   | 0   |   |
| 33  | CALM1       | CAMK1       | 1mux_A pocket2                                                      | 0   | 0  | 0  | 0  | 0  | 163 | 77 | 0    | 0  | 0  | 0  | 0  | 0  | 0  | 0  | 0   | 0   | 0   | 0    | 0   | 0   | 0   | 0   | 0   | 0   | 0   | 0   | 0   |   |
| 34  | CALM1       | MYLK        | 1mux_A pocket1                                                      | 0   | 0  | 0  | 0  | 0  | 126 | 12 | 0    | 0  | 0  | 0  | 0  | 0  | 0  | 0  | 0   | 0   | 0   | 1    | 0   | 0   | 0   | 0   | 0   | 0   | 0   | 0   | 0   |   |
| 35  | CALM1       | MYLK        | 1mux_A pocket2                                                      | 0   | 0  | 0  | 0  | 0  | 126 | 30 | 0    | 0  | 0  | 0  | 0  | 0  | 0  | 0  | 0   | 0   | 0   | 0    | 0   | 0   | 0   | 0   | 0   | 0   | 0   | 0   | 0   |   |
| 36  | CALM1       | PDE1A       | 1qiv_A                                                              | 0   | 0  | 0  | 0  | 0  | 0   | 0  | 0    | 0  | 0  | 0  | 0  | 0  | 0  | 0  | 0   | 0   | 5   | 0    | 0   | 0   | 0   | 0   | 0   | 0   | 0   | 0   | 0   |   |
| 37  | CD4         | HLA-DQB1    | 1j4_D                                                               | 0   | 0  | 0  | 0  | 0  | 0   | 0  | 0    | 0  | 0  | 0  | 0  | 0  | 0  | 0  | 0   | 0   | 0   | 0    | 0   | 0   | 0   | 0   | 1   | 0   | 2   | 0   |     |   |
| 38  | CREBBP      | TP53        | 2d82_A                                                              | 0   | 0  | 0  | 0  | 0  | 0   | 0  | 0    | 0  | 0  | 0  | 0  | 0  | 0  | 0  | 0   | 0   | 0   | 0    | 0   | 0   | 0   | 17  | 0   | 15  | 0   | 0   |     |   |
| 39  | ESR1        | NCOA2       | 3erd_A                                                              | 0   | 0  | 0  | 0  | 0  | 0   | 1  | 0    | 0  | 0  | 0  | 0  | 0  | 0  | 0  | 0   | 0   | 0   | 3298 | 0   | 0   | 0   | 0   | 0   | 0   | 0   | 0   | 0   |   |
| 40  | ESR1        | NCOA2       | 3erd_B                                                              | 0   | 0  | 0  | 0  | 0  | 2   | 0  | 0    | 0  | 0  | 0  | 0  | 0  | 0  | 0  | 0   | 0   | 0   | 2151 | 0   | 0   | 0   | 0   | 0   | 0   | 0   | 0   | 0   |   |
| 41  | FKBP1A      | TGFB1       | 1fkj_A                                                              | 0   | 0  | 0  | 0  | 0  | 0   | 0  | 0    | 0  | 0  | 0  | 0  | 0  | 0  | 0  | 0   | 0   | 0   | 1    | 0   | 0   | 0   | 0   | 0   | 0   | 1   | 0   | 0   |   |
| 42  | FKBP1A      | TGFB1       | 1fkf_A                                                              | 0   | 0  | 0  | 0  | 0  | 0   | 0  | 0    | 0  | 0  | 0  | 0  | 0  | 0  | 0  | 0   | 0   | 0   | 0    | 0   | 0   | 0   | 1   | 0   | 0   | 1   | 0   | 0   |   |
| 43  | EGFR        | GRB2        | 1qj1_B                                                              | 0   | 1  | 0  | 0  | 1  | 0   | 0  | 1288 | 0  | 0  | 0  | 0  | 0  | 0  | 0  | 0   | 1   | 0   | 0    | 0   | 0   | 0   | 0   | 0   | 0   | 0   | 1   | 0   | 0 |
| 44  | EGFR        | GRB2        | 1qj1_C                                                              | 0   | 1  | 0  | 0  | 1  | 0   | 0  | 1286 | 0  | 0  | 0  | 0  | 0  | 0  | 1  | 0   | 1   | 0   | 0    | 0   | 0   | 0   | 0   | 0   | 0   | 0   | 1   | 0   | 0 |
| 45  | EGFR        | GRB2        | 1qj1_D                                                              | 0   | 1  | 0  | 0  | 1  | 0   | 0  | 1293 | 0  | 0  | 0  | 0  | 0  | 0  | 0  | 0   | 1   | 0   | 0    | 0   | 0   | 0   | 0   | 0   | 0   | 0   | 1   | 0   | 0 |
| 46  | EGFR        | GRB2        | 1qj1_E                                                              | 0   | 1  | 0  | 0  | 1  | 0   | 0  | 1280 | 0  | 0  | 0  | 0  | 0  | 0  | 1  | 0   | 1   | 0   | 0    | 0   | 0   | 0   | 0   | 0   | 0   | 0   | 1   | 0   | 0 |
| 47  | EGFR        | GRB2        | 1qj1_F                                                              | 0   | 1  | 0  | 0  | 1  | 0   | 0  | 1316 | 0  | 0  | 0  | 0  | 0  | 0  | 0  | 0   | 1   | 0   | 0    | 0   | 0   | 0   | 0   | 0   | 0   | 0   | 1   | 0   | 0 |
| 48  | EGFR        | GRB2        | 1qj1_G                                                              | 0   | 1  | 0  | 0  | 1  | 0   | 0  | 1322 | 0  | 0  | 0  | 0  | 0  | 0  | 1  | 0   | 1   | 0   | 0    | 0   | 0   | 0   | 0   | 0   | 0   | 0   | 1   | 0   | 0 |
| 49  | EGFR        | GRB2        | 1qj1_H                                                              | 0   | 0  | 1  | 0  | 2  | 0   | 0  | 1354 | 0  | 0  | 0  | 0  | 0  | 0  | 0  | 0   | 1   | 0   | 0    | 0   | 0   | 0   | 0   | 0   | 0   | 0   | 1   | 0   | 0 |
| 50  | EGFR        | GRB2        | 1qj1_I                                                              | 0   | 1  | 0  | 0  | 0  | 0   | 0  | 1274 | 0  | 0  | 0  | 0  | 0  | 0  | 0  | 0   | 1   | 0   | 0    | 0   | 0   | 0   | 0   | 0   | 0   | 0   | 1   | 0   | 0 |
| 51  | EGFR        | GRB2        | 1qj1_J                                                              | 0   | 1  | 0  | 0  | 1  | 0   | 0  | 1286 | 0  | 0  | 0  | 0  | 0  | 0  | 0  | 0   | 1   | 0   | 0    | 0   | 0   | 0   | 0   | 0   | 0   | 0   | 1   | 0   | 0 |
| 52  | GRB2        | MET         | 1qj1_B                                                              | 0   | 0  | 0  | 2  | 0  | 0   | 0  | 941  | 0  | 0  | 0  | 0  | 0  | 0  | 1  | 1   | 0   | 0   | 0    | 0   | 0   | 0   | 0   | 1   | 0   | 0   | 7   | 0   | 0 |
| 53  | GRB2        | MET         | 1qj1_C                                                              | 0   | 0  | 0  | 1  | 0  | 0   | 0  | 922  | 0  | 0  | 0  | 0  | 0  | 0  | 2  | 3   | 0   | 0   | 0    | 0   | 0   | 0   | 0   | 1   | 0   | 0   | 7   | 0   | 0 |
| 54  | GRB2        | MET         | 1qj1_D                                                              | 0   | 0  | 0  | 2  | 0  | 0   | 0  | 931  | 0  | 0  | 0  | 0  | 0  | 0  | 1  | 1   | 0   | 0   | 0    | 0   | 0   | 0   | 0   | 0   | 0   | 0   | 8   | 0   | 0 |
| 55  | GRB2        | MET         | 1qj1_E                                                              | 0   | 0  | 0  | 2  | 0  | 0   | 0  | 852  | 0  | 0  | 0  | 0  | 0  | 0  | 2  | 2   | 0   | 0   | 0    | 0   | 0   | 0   | 0   | 1   | 0   | 0   | 12  | 0   | 0 |
| 56  | GRB2        | MET         | 1qj1_F                                                              | 0   | 0  | 0  | 1  | 0  | 0   | 0  | 960  | 0  | 0  | 0  | 0  | 0  | 0  | 1  | 2   | 0   | 0   | 0    | 0   | 0   | 0   | 0   | 0   | 0   | 0   | 7   | 0   | 0 |
| 57  | GRB2        | MET         | 1qj1_G                                                              | 0   | 0  | 0  | 1  | 0  | 0   | 0  | 958  | 0  | 0  | 0  | 0  | 0  | 0  | 1  | 2   | 0   | 0   | 0    | 0   | 0   | 0   | 0   | 0   | 0   | 0   | 7   | 0   | 0 |
| 58  | GRB2        | MET         | 1qj1_H                                                              | 0   | 0  | 0  | 1  | 0  |     |    |      |    |    |    |    |    |    |    |     |     |     |      |     |     |     |     |     |     |     |     |     |   |

Table S3. (continued)

| No. | Interactor1 | Interactor2 | PDB entries used for detecting the pockets located on FPI interface | 113  | 114  | 115  | 116  | Druggability score (using all attributes) |
|-----|-------------|-------------|---------------------------------------------------------------------|------|------|------|------|-------------------------------------------|
| 1   | ARF1        | CYTH2       | 1s9d_A <sup>a</sup>                                                 | 0    | 369  | 0    | 0    | 0.8793                                    |
| 2   | ARF1        | CYTH2       | 1s9d_E <sup>b</sup>                                                 | 0    | 0    | 0    | 0    | 0.7030                                    |
| 3   | ARF1        | CYTH2       | 1r8q_A <sup>b</sup>                                                 | 46   | 304  | 0    | 0    | 0.8687                                    |
| 4   | ARF1        | CYTH2       | 1r8q_E <sup>b</sup>                                                 | 17   | 2    | 0    | 0    | 0.8917                                    |
| 5   | ARF1        | CYTH2       | 1r8q_B <sup>b</sup>                                                 | 26   | 366  | 0    | 0    | 0.8636                                    |
| 6   | ARF1        | CYTH2       | 1r8q_F <sup>b</sup>                                                 | 5    | 2    | 0    | 0    | 0.8893                                    |
| 7   | ARF1        | CYTH2       | 1r8q_BF <sup>c</sup>                                                | 0    | 9    | 0    | 0    | 0.9689                                    |
| 8   | ARF1        | CYTH2       | 1s9d_AE <sup>c</sup>                                                | 0    | 0    | 0    | 0    | 0.9274                                    |
| 9   | ARF1        | CYTH2       | 1r8s_AE <sup>c</sup>                                                | 0    | 30   | 0    | 0    | 0.9777                                    |
| 10  | ARF1        | CYTH1       | 1s9d_A <sup>b</sup>                                                 | 0    | 356  | 0    | 0    | 0.8660                                    |
| 11  | ARF1        | CYTH1       | 1s9d_E <sup>b</sup>                                                 | 0    | 0    | 0    | 0    | 0.6608                                    |
| 12  | ARF1        | CYTH1       | 1r8q_A <sup>b</sup>                                                 | 40   | 330  | 0    | 0    | 0.8434                                    |
| 13  | ARF1        | CYTH1       | 1r8q_E <sup>b</sup>                                                 | 21   | 1    | 0    | 0    | 0.8829                                    |
| 14  | ARF1        | CYTH1       | 1r8q_B <sup>b</sup>                                                 | 30   | 360  | 0    | 0    | 0.8383                                    |
| 15  | ARF1        | CYTH1       | 1r8q_F <sup>b</sup>                                                 | 6    | 2    | 0    | 0    | 0.8790                                    |
| 16  | ARF1        | CYTH1       | 1r8q_BF <sup>c</sup>                                                | 0    | 9    | 0    | 0    | 0.9633                                    |
| 17  | ARF1        | CYTH1       | 1s9d_AE <sup>c</sup>                                                | 0    | 0    | 0    | 0    | 0.9122                                    |
| 18  | ARF1        | CYTH1       | 1r8s_AE <sup>c</sup>                                                | 0    | 33   | 0    | 0    | 0.9746                                    |
| 19  | BAK1        | BCL2        | 2o2f_A                                                              | 0    | 0    | 1    | 0    | 0.9489                                    |
| 20  | BAK1        | BCL2        | 2o22_A                                                              | 0    | 1    | 0    | 0    | 0.9602                                    |
| 21  | BAK1        | BCL2        | 2o21_A                                                              | 0    | 0    | 1    | 0    | 0.9432                                    |
| 22  | BAK1        | BCL2        | 1ysw_A                                                              | 0    | 0    | 0    | 0    | 0.9459                                    |
| 23  | BAK1        | BCL2L1      | 2o2n_A                                                              | 0    | 0    | 1    | 0    | 0.9412                                    |
| 24  | BAK1        | BCL2L1      | 2o2m_A                                                              | 0    | 0    | 0    | 0    | 0.8538                                    |
| 25  | BAK1        | BCL2L1      | 2yxj_A                                                              | 0    | 0    | 0    | 0    | 0.9451                                    |
| 26  | BAK1        | BCL2L1      | 2yxj_B                                                              | 0    | 0    | 0    | 0    | 0.9325                                    |
| 27  | BAK1        | BCL2L1      | 1ysi_A                                                              | 0    | 0    | 0    | 0    | 0.9248                                    |
| 28  | BAK1        | BCL2L1      | 2w3l_A                                                              | 0    | 0    | 0    | 0    | 0.8393                                    |
| 29  | BAK1        | BCL2L1      | 2w3l_B                                                              | 0    | 0    | 0    | 0    | 0.8379                                    |
| 30  | BAK1        | BCL2L1      | 3inq_A                                                              | 0    | 0    | 0    | 0    | 0.9289                                    |
| 31  | BAK1        | BCL2L1      | 3inq_B                                                              | 0    | 0    | 0    | 0    | 0.8898                                    |
| 32  | CALM1       | CAMK1       | 1mux_A_pocket1                                                      | 0    | 0    | 0    | 0    | 0.9860                                    |
| 33  | CALM1       | CAMK1       | 1mux_A_pocket2                                                      | 0    | 0    | 0    | 0    | 0.9877                                    |
| 34  | CALM1       | MYLK        | 1mux_A_pocket1                                                      | 0    | 0    | 0    | 0    | 0.9926                                    |
| 35  | CALM1       | MYLK        | 1mux_A_pocket2                                                      | 0    | 0    | 0    | 0    | 0.9946                                    |
| 36  | CALM1       | PDE1A       | 1qiv_A                                                              | 0    | 0    | 0    | 0    | 0.9993                                    |
| 37  | CD4         | HLA-DQB1    | 1j4_D                                                               | 0    | 0    | 0    | 0    | 0.9400                                    |
| 38  | CREBBP      | TP53        | 2d82_A                                                              | 0    | 0    | 0    | 0    | 0.9835                                    |
| 39  | ESR1        | NCOA2       | 3erd_A                                                              | 0    | 0    | 0    | 0    | 0.9574                                    |
| 40  | ESR1        | NCOA2       | 3erd_B                                                              | 0    | 0    | 0    | 0    | 0.9514                                    |
| 41  | FKBP1A      | TGFBR1      | 1fkj_A                                                              | 0    | 0    | 0    | 0    | 0.9527                                    |
| 42  | FKBP1A      | TGFBR1      | 1fkf_A                                                              | 0    | 0    | 0    | 0    | 0.9510                                    |
| 43  | EGFR        | GRB2        | 1cj1_B                                                              | 0    | 0    | 9    | 0    | 0.9990                                    |
| 44  | EGFR        | GRB2        | 1cj1_C                                                              | 0    | 0    | 8    | 0    | 0.9990                                    |
| 45  | EGFR        | GRB2        | 1cj1_D                                                              | 0    | 0    | 9    | 0    | 0.9990                                    |
| 46  | EGFR        | GRB2        | 1cj1_E                                                              | 0    | 0    | 8    | 0    | 0.9989                                    |
| 47  | EGFR        | GRB2        | 1cj1_F                                                              | 0    | 0    | 9    | 0    | 0.9990                                    |
| 48  | EGFR        | GRB2        | 1cj1_G                                                              | 0    | 0    | 8    | 0    | 0.9989                                    |
| 49  | EGFR        | GRB2        | 1cj1_H                                                              | 0    | 0    | 9    | 0    | 0.9989                                    |
| 50  | EGFR        | GRB2        | 1cj1_I                                                              | 0    | 0    | 8    | 0    | 0.9990                                    |
| 51  | EGFR        | GRB2        | 1cj1_J                                                              | 0    | 0    | 9    | 0    | 0.9990                                    |
| 52  | GRB2        | MET         | 1cj1_B                                                              | 0    | 0    | 1    | 0    | 0.9998                                    |
| 53  | GRB2        | MET         | 1cj1_C                                                              | 0    | 0    | 0    | 0    | 0.9998                                    |
| 54  | GRB2        | MET         | 1cj1_D                                                              | 0    | 0    | 0    | 0    | 0.9998                                    |
| 55  | GRB2        | MET         | 1cj1_E                                                              | 0    | 0    | 0    | 0    | 0.9999                                    |
| 56  | GRB2        | MET         | 1cj1_F                                                              | 0    | 0    | 1    | 0    | 0.9998                                    |
| 57  | GRB2        | MET         | 1cj1_G                                                              | 0    | 0    | 0    | 0    | 0.9998                                    |
| 58  | GRB2        | MET         | 1cj1_H                                                              | 0    | 0    | 0    | 0    | 0.9997                                    |
| 59  | GRB2        | MET         | 1cj1_I                                                              | 0    | 0    | 0    | 0    | 0.9998                                    |
| 60  | GRB2        | MET         | 1cj1_J                                                              | 0    | 0    | 1    | 0    | 0.9998                                    |
| 61  | HOXB1       | PBX1        | 1b72_B                                                              | 0    | 0    | 38   | 11   | 0.6464                                    |
| 62  | IL1B        | IL1R1       | 1ltb_B                                                              | 0    | 0    | 0    | 0    | 0.8652                                    |
| 63  | IL2         | IL2RA       | 1py2_A                                                              | 0    | 0    | 831  | 1    | 0.8897                                    |
| 64  | IL2         | IL2RA       | 1py2_B                                                              | 0    | 0    | 825  | 3    | 0.8959                                    |
| 65  | IL2         | IL2RA       | 1py2_C                                                              | 0    | 0    | 826  | 0    | 0.8904                                    |
| 66  | IL2         | IL2RA       | 1py2_D                                                              | 0    | 0    | 827  | 2    | 0.8835                                    |
| 67  | IL2         | IL2RA       | 1m48_A                                                              | 0    | 0    | 845  | 7    | 0.9061                                    |
| 68  | IL2         | IL2RA       | 1m48_B                                                              | 0    | 0    | 847  | 12   | 0.8972                                    |
| 69  | IL2         | IL2RA       | 1m4a_A                                                              | 0    | 0    | 847  | 202  | 0.7669                                    |
| 70  | PTEN        | MAGI3       | 1be9_A                                                              | 0    | 0    | 0    | 0    | 0.7637                                    |
| 71  | MDM2        | TP53        | 14e_A                                                               | 0    | 0    | 0    | 0    | 0.9869                                    |
| 72  | MDM2        | TP53        | 14e_B                                                               | 0    | 0    | 0    | 0    | 0.9860                                    |
| 73  | MDM2        | TP53        | 1ttv_A                                                              | 0    | 0    | 7    | 0    | 0.9838                                    |
| 74  | MDM2        | TP53        | 3zjk_A                                                              | 0    | 0    | 0    | 0    | 0.9560                                    |
| 75  | MDM2        | TP53        | 3lbk_A                                                              | 0    | 0    | 3    | 0    | 0.9806                                    |
| 76  | MDM2        | TP53        | 3lbi_A                                                              | 0    | 0    | 0    | 0    | 0.9438                                    |
| 77  | MDM2        | TP53        | 3lbi_C                                                              | 0    | 0    | 0    | 0    | 0.9732                                    |
| 78  | MDM2        | TP53        | 3lbi_E                                                              | 0    | 0    | 0    | 0    | 0.9590                                    |
| 79  | MDM4        | TP53        | 3lbi_E                                                              | 0    | 0    | 0    | 0    | 0.9943                                    |
| 80  | PDGFRB      | PIK3R1      | 1h9o_A                                                              | 0    | 0    | 21   | 0    | 1.0000                                    |
| 81  | RAC1        | TIAM1       | 1foe_B                                                              | 222  | 41   | 0    | 0    | 0.9973                                    |
| 82  | RAC1        | TIAM1       | 1foe_D                                                              | 163  | 51   | 0    | 0    | 0.9973                                    |
| 83  | RAC1        | TIAM1       | 1foe_F                                                              | 83   | 111  | 0    | 0    | 0.9962                                    |
| 84  | RAC1        | TIAM1       | 1foe_H                                                              | 77   | 71   | 0    | 0    | 0.9945                                    |
| 85  | RAC1        | TRIO        | 2nz8_A                                                              | 0    | 0    | 0    | 0    | 0.9995                                    |
| 86  | RAF1        | YWHAZ       | 3rdh_A                                                              | 0    | 0    | 0    | 0    | 0.9848                                    |
| 87  | RAF1        | YWHAZ       | 3rdh_B                                                              | 0    | 0    | 0    | 0    | 0.9867                                    |
| 88  | RAF1        | YWHAZ       | 3rdh_C                                                              | 0    | 0    | 0    | 0    | 0.9853                                    |
| 89  | RAF1        | YWHAZ       | 3rdh_D                                                              | 0    | 0    | 0    | 0    | 0.9713                                    |
| 90  | S100B       | TP53        | 3hcm_A                                                              | 0    | 0    | 0    | 0    | 0.9297                                    |
| 91  | S100B       | TP53        | 3hcm_B                                                              | 0    | 0    | 0    | 0    | 0.9134                                    |
| 92  | STAT3       | STAT3       | 1bg1_A                                                              | 0    | 0    | 2    | 0    | 0.9517                                    |
| 93  | BIRC5       | BIRC5       | 1e31_A                                                              | 0    | 0    | 0    | 0    | 0.6905                                    |
| 94  | BIRC5       | BIRC5       | 1e31_B                                                              | 0    | 0    | 0    | 0    | 0.6757                                    |
| 95  | BIRC5       | BIRC5       | 1f3h_A                                                              | 0    | 0    | 7    | 0    | 0.6714                                    |
| 96  | BIRC5       | BIRC5       | 1f3h_B                                                              | 0    | 0    | 0    | 0    | 0.6721                                    |
| 97  | BIRC5       | BIRC5       | 1xox_A                                                              | 0    | 0    | 2    | 0    | 0.6976                                    |
| 98  | BIRC5       | BIRC5       | 1xox_B                                                              | 0    | 0    | 2    | 0    | 0.6964                                    |
| 99  | CTNNB1      | TCF7L1      | 1g3l_A                                                              | 0    | 0    | 0    | 0    | 0.9906                                    |
| 100 | CTNNB1      | TCF7L1      | 1g3l_C                                                              | 0    | 0    | 0    | 0    | 0.9925                                    |
| 101 | CTNNB1      | TCF7L2      | 1g3l_A                                                              | 0    | 0    | 0    | 0    | 0.9894                                    |
| 102 | CTNNB1      | TCF7L2      | 1g3l_C                                                              | 0    | 0    | 0    | 0    | 0.9926                                    |
| 103 | THRB        | NCOA2       | 1bsv_B                                                              | 0    | 0    | 1    | 0    | 0.7834                                    |
| 104 | TNF         | TNF         | 2az5_AB                                                             | 0    | 0    | 3    | 3    | 0.8891                                    |
| 105 | TNF         | TNF         | 2az5_CD                                                             | 0    | 0    | 3    | 3    | 0.8850                                    |
| 106 | XIAP        | CASP3       | 1i3o_E_pocket1                                                      | 861  | 567  | 0    | 0    | 0.7888                                    |
| 107 | XIAP        | CASP3       | 1i3o_E_pocket2                                                      | 0    | 0    | 0    | 0    | 0.8621                                    |
| 108 | XIAP        | CASP3       | 1i3o_F_pocket3                                                      | 806  | 579  | 0    | 0    | 0.7926                                    |
| 109 | XIAP        | CASP3       | 1i3o_F_pocket4                                                      | 0    | 0    | 0    | 0    | 0.8894                                    |
| 110 | XIAP        | CASP9       | 1ftt_A                                                              | 453  | 2313 | 0    | 0    | 0.9292                                    |
| 111 | XIAP        | CASP9       | 1mw9_A                                                              | 1453 | 2376 | 0    | 0    | 0.8767                                    |
| 112 | XIAP        | DIABLO      | 1g73_C                                                              | 2709 | 1011 | 0    | 0    | 0.8300                                    |
| 113 | XIAP        | DIABLO      | 1g73_D                                                              | 2831 | 952  | 0    | 0    | 0.8385                                    |
| 114 | XIAP        | DIABLO      | 2zpy_A                                                              | 400  | 3576 | 0    | 0    | 0.8329                                    |
| 115 | CD247       | ZAP70       | 2oq1_A_pocket1                                                      | 0    | 0    | 2464 | 426  | 0.2908                                    |
| 116 | CD247       | ZAP70       | 2oq1_A_pocket2                                                      | 0    | 0    | 2430 | 1720 | 0.4254                                    |

When the druggability of a positive instance (in row) was assessed by our SVM-based method, the number of times each positive instance (in column) was located nearest to the assessed positive instance in a feature space was shown in a cell.

<sup>a</sup>For the details of the attributes and pocket-constituting amino acids of the positive instances used for our SVM-based method, see [http://www.drpias.net/positives\\_attributes.txt](http://www.drpias.net/positives_attributes.txt) and [http://www.drpias.net/positives\\_amino\\_acids.txt](http://www.drpias.net/positives_amino_acids.txt).

<sup>b</sup>Brefeldin-binding pocket.

<sup>c</sup>Target pocket in Viaud, J., Zeghouf, M., Barelli, H., Zee, J.C., Padilla, A., Guibert, B., Chardin, P., Royer, C.A., Cherfils, J. and Chavanier, A. (2007) Structure-based discovery of an inhibitor of Arf activation by Sec7 domains through targeting of protein-protein complexes. *Proc. Natl. Acad. Sci. U. S. A.*, **104**, 10370-10375.



Table S4. Matrix of the similarities of the positive instances assessed by our SVM model using structural attributes: <sup>a</sup>

| No. | Interactor1 | Interactor2 | PDB entries used for detecting the pockets located on PPI interface | 1    | 2    | 3   | 4    | 5   | 6    | 7    | 8    | 9    | 10 | 11 | 12 | 13 | 14 | 15 | 16 | 17 | 18 | 19   | 20   | 21   | 22   | 23  | 24  | 25  | 26  | 27  | 28  |   |
|-----|-------------|-------------|---------------------------------------------------------------------|------|------|-----|------|-----|------|------|------|------|----|----|----|----|----|----|----|----|----|------|------|------|------|-----|-----|-----|-----|-----|-----|---|
| 1   | ARF1        | CYTH2       | 1s9d_A <sup>b</sup>                                                 | 4523 | 0    | 835 | 0    | 608 | 0    | 0    | 22   | 0    | 0  | 0  | 0  | 0  | 0  | 0  | 0  | 0  | 0  | 140  | 128  | 46   | 58   | 0   | 0   | 0   | 9   | 66  | 0   |   |
| 2   | ARF1        | CYTH2       | 1s9d_E <sup>b</sup>                                                 | 1793 | 1192 | 0   | 6    | 0   | 11   | 0    | 37   | 0    | 0  | 0  | 0  | 0  | 0  | 0  | 0  | 0  | 0  | 0    | 0    | 0    | 0    | 0   | 0   | 0   | 0   | 0   | 1   |   |
| 3   | ARF1        | CYTH2       | 1r8q_A <sup>b</sup>                                                 | 4411 | 0    | 986 | 0    | 759 | 0    | 0    | 0    | 0    | 0  | 0  | 0  | 0  | 0  | 0  | 0  | 0  | 0  | 94   | 37   | 0    | 4    | 0   | 0   | 0   | 0   | 20  | 0   |   |
| 4   | ARF1        | CYTH2       | 1r8q_E <sup>b</sup>                                                 | 2496 | 42   | 0   | 1081 | 0   | 1707 | 0    | 0    | 0    | 0  | 0  | 0  | 0  | 0  | 0  | 0  | 0  | 0  | 0    | 0    | 0    | 0    | 0   | 0   | 0   | 0   | 0   | 1   |   |
| 5   | ARF1        | CYTH2       | 1r8q_B <sup>b</sup>                                                 | 4413 | 0    | 784 | 0    | 960 | 0    | 0    | 0    | 0    | 0  | 0  | 0  | 0  | 0  | 0  | 0  | 0  | 0  | 41   | 14   | 0    | 0    | 0   | 0   | 0   | 0   | 0   | 0   |   |
| 6   | ARF1        | CYTH2       | 1r8q_F <sup>b</sup>                                                 | 2020 | 40   | 0   | 612  | 0   | 2666 | 0    | 0    | 0    | 0  | 0  | 0  | 0  | 0  | 0  | 0  | 0  | 0  | 0    | 0    | 0    | 0    | 0   | 0   | 0   | 0   | 0   | 1   |   |
| 7   | ARF1        | CYTH2       | 1r8q_BF <sup>c</sup>                                                | 0    | 0    | 2   | 0    | 0   | 0    | 4796 | 1556 | 2693 | 0  | 0  | 0  | 0  | 0  | 0  | 0  | 0  | 0  | 0    | 0    | 0    | 0    | 0   | 0   | 0   | 0   | 0   | 0   |   |
| 8   | ARF1        | CYTH2       | 1s9d_AE <sup>c</sup>                                                | 3    | 0    | 1   | 0    | 0   | 0    | 579  | 4952 | 547  | 0  | 0  | 0  | 0  | 0  | 0  | 0  | 0  | 0  | 0    | 0    | 0    | 0    | 0   | 0   | 0   | 0   | 0   | 0   |   |
| 9   | ARF1        | CYTH2       | 1r8s_AE <sup>c</sup>                                                | 0    | 0    | 1   | 0    | 0   | 0    | 3016 | 1307 | 4124 | 0  | 0  | 0  | 0  | 0  | 0  | 0  | 0  | 0  | 0    | 0    | 0    | 0    | 0   | 0   | 0   | 0   | 0   | 0   |   |
| 10  | ARF1        | CYTH1       | 1s9d_A <sup>b</sup>                                                 | 4523 | 0    | 835 | 0    | 608 | 0    | 0    | 22   | 0    | 0  | 0  | 0  | 0  | 0  | 0  | 0  | 0  | 0  | 140  | 128  | 46   | 58   | 0   | 0   | 0   | 9   | 66  | 0   |   |
| 11  | ARF1        | CYTH1       | 1s9d_E <sup>b</sup>                                                 | 1793 | 1192 | 0   | 6    | 0   | 11   | 0    | 37   | 0    | 0  | 0  | 0  | 0  | 0  | 0  | 0  | 0  | 0  | 0    | 0    | 0    | 0    | 0   | 0   | 0   | 0   | 0   | 1   |   |
| 12  | ARF1        | CYTH1       | 1r8q_A <sup>b</sup>                                                 | 4411 | 0    | 986 | 0    | 759 | 0    | 0    | 0    | 0    | 0  | 0  | 0  | 0  | 0  | 0  | 0  | 0  | 0  | 94   | 37   | 0    | 4    | 0   | 0   | 0   | 0   | 20  | 0   |   |
| 13  | ARF1        | CYTH1       | 1r8q_E <sup>b</sup>                                                 | 2496 | 42   | 0   | 1081 | 0   | 1707 | 0    | 0    | 0    | 0  | 0  | 0  | 0  | 0  | 0  | 0  | 0  | 0  | 0    | 0    | 0    | 0    | 0   | 0   | 0   | 0   | 0   | 1   |   |
| 14  | ARF1        | CYTH1       | 1r8q_B <sup>b</sup>                                                 | 4413 | 0    | 784 | 0    | 960 | 0    | 0    | 0    | 0    | 0  | 0  | 0  | 0  | 0  | 0  | 0  | 0  | 0  | 41   | 14   | 0    | 0    | 0   | 0   | 0   | 0   | 0   | 0   |   |
| 15  | ARF1        | CYTH1       | 1r8q_F <sup>b</sup>                                                 | 2020 | 40   | 0   | 612  | 0   | 2666 | 0    | 0    | 0    | 0  | 0  | 0  | 0  | 0  | 0  | 0  | 0  | 0  | 0    | 0    | 0    | 0    | 0   | 0   | 0   | 0   | 0   | 1   |   |
| 16  | ARF1        | CYTH1       | 1r8q_BF <sup>c</sup>                                                | 0    | 0    | 2   | 0    | 0   | 0    | 4796 | 1556 | 2693 | 0  | 0  | 0  | 0  | 0  | 0  | 0  | 0  | 0  | 0    | 0    | 0    | 0    | 0   | 0   | 0   | 0   | 0   | 0   |   |
| 17  | ARF1        | CYTH1       | 1s9d_AE <sup>c</sup>                                                | 3    | 0    | 1   | 0    | 0   | 0    | 579  | 4952 | 547  | 0  | 0  | 0  | 0  | 0  | 0  | 0  | 0  | 0  | 0    | 0    | 0    | 0    | 0   | 0   | 0   | 0   | 0   | 0   |   |
| 18  | ARF1        | CYTH1       | 1r8s_AE <sup>c</sup>                                                | 0    | 0    | 1   | 0    | 0   | 0    | 3016 | 1307 | 4124 | 0  | 0  | 0  | 0  | 0  | 0  | 0  | 0  | 0  | 0    | 0    | 0    | 0    | 0   | 0   | 0   | 0   | 0   | 0   |   |
| 19  | BAK1        | BCL2        | 2o2f_A                                                              | 46   | 0    | 13  | 0    | 13  | 0    | 0    | 0    | 0    | 0  | 0  | 0  | 0  | 0  | 0  | 0  | 0  | 0  | 2181 | 2156 | 2103 | 1138 | 233 | 165 | 77  | 112 | 121 | 178 |   |
| 20  | BAK1        | BCL2        | 2o22_A                                                              | 46   | 0    | 10  | 0    | 13  | 0    | 0    | 0    | 0    | 0  | 0  | 0  | 0  | 0  | 0  | 0  | 0  | 0  | 2176 | 2155 | 2057 | 1088 | 279 | 178 | 86  | 108 | 131 | 205 |   |
| 21  | BAK1        | BCL2        | 2o21_A                                                              | 31   | 0    | 6   | 0    | 10  | 0    | 0    | 0    | 0    | 0  | 0  | 0  | 0  | 0  | 0  | 0  | 0  | 0  | 2090 | 2057 | 2111 | 1297 | 210 | 151 | 90  | 107 | 128 | 212 |   |
| 22  | BAK1        | BCL2        | 1ysw_A                                                              | 40   | 0    | 11  | 0    | 8   | 0    | 0    | 0    | 0    | 0  | 0  | 0  | 0  | 0  | 0  | 0  | 0  | 0  | 2087 | 2047 | 2012 | 1396 | 209 | 152 | 89  | 108 | 131 | 210 |   |
| 23  | BAK1        | BCL2L1      | 2o2n_A                                                              | 1    | 0    | 1   | 0    | 0   | 0    | 0    | 0    | 0    | 0  | 0  | 0  | 0  | 0  | 0  | 0  | 0  | 0  | 1684 | 1260 | 752  | 393  | 947 | 883 | 272 | 386 | 503 | 50  |   |
| 24  | BAK1        | BCL2L1      | 2o2m_A                                                              | 0    | 0    | 0   | 0    | 0   | 0    | 0    | 0    | 0    | 0  | 0  | 0  | 0  | 0  | 0  | 0  | 0  | 0  | 1761 | 1577 | 1103 | 572  | 948 | 888 | 114 | 418 | 189 | 189 |   |
| 25  | BAK1        | BCL2L1      | 2yxj_A                                                              | 8    | 0    | 2   | 0    | 4   | 0    | 0    | 0    | 0    | 0  | 0  | 0  | 0  | 0  | 0  | 0  | 0  | 0  | 825  | 912  | 687  | 381  | 765 | 520 | 753 | 661 | 705 | 132 |   |
| 26  | BAK1        | BCL2L1      | 2yxj_B                                                              | 10   | 0    | 3   | 0    | 2   | 0    | 0    | 0    | 0    | 0  | 0  | 0  | 0  | 0  | 0  | 0  | 0  | 0  | 819  | 726  | 583  | 417  | 763 | 635 | 733 | 821 | 760 | 81  |   |
| 27  | BAK1        | BCL2L1      | 1ysi_A                                                              | 44   | 0    | 25  | 0    | 6   | 0    | 0    | 0    | 0    | 0  | 0  | 0  | 0  | 0  | 0  | 0  | 0  | 0  | 742  | 708  | 590  | 437  | 783 | 681 | 721 | 797 | 886 | 37  |   |
| 28  | BAK1        | BCL2L1      | 2w3l_A                                                              | 0    | 0    | 0   | 0    | 0   | 0    | 0    | 0    | 0    | 0  | 0  | 0  | 0  | 0  | 0  | 0  | 0  | 0  | 1343 | 1638 | 1640 | 1013 | 70  | 108 | 6   | 7   | 6   | 975 |   |
| 29  | BAK1        | BCL2L1      | 2w3l_B                                                              | 0    | 0    | 0   | 0    | 0   | 0    | 0    | 0    | 0    | 0  | 0  | 0  | 0  | 0  | 0  | 0  | 0  | 0  | 1391 | 1663 | 1663 | 1031 | 111 | 140 | 33  | 4   | 6   | 982 |   |
| 30  | BAK1        | BCL2L1      | 3inq_A                                                              | 3    | 0    | 2   | 0    | 2   | 0    | 0    | 0    | 0    | 0  | 0  | 0  | 0  | 0  | 0  | 0  | 0  | 0  | 1445 | 821  | 625  | 328  | 919 | 432 | 388 | 764 | 507 | 120 |   |
| 31  | BAK1        | BCL2L1      | 3inq_B                                                              | 7    | 0    | 0   | 0    | 1   | 0    | 0    | 0    | 0    | 0  | 0  | 0  | 0  | 0  | 0  | 0  | 0  | 0  | 1156 | 811  | 849  | 488  | 444 | 419 | 624 | 637 | 649 | 189 |   |
| 32  | CALM1       | CAMK1       | 1mux_A_pocket1                                                      | 18   | 6    | 2   | 0    | 0   | 0    | 1    | 0    | 0    | 0  | 0  | 0  | 0  | 0  | 0  | 0  | 0  | 0  | 0    | 0    | 0    | 1    | 0   | 0   | 0   | 0   | 0   | 31  |   |
| 33  | CALM1       | CAMK1       | 1mux_A_pocket2                                                      | 1    | 0    | 1   | 0    | 0   | 0    | 0    | 0    | 0    | 0  | 0  | 0  | 0  | 0  | 0  | 0  | 0  | 0  | 0    | 1    | 0    | 0    | 0   | 0   | 0   | 0   | 0   | 73  |   |
| 34  | CALM1       | MYLK        | 1mux_A_pocket1                                                      | 18   | 6    | 2   | 0    | 0   | 0    | 1    | 0    | 0    | 0  | 0  | 0  | 0  | 0  | 0  | 0  | 0  | 0  | 0    | 0    | 0    | 1    | 0   | 0   | 0   | 0   | 0   | 31  |   |
| 35  | CALM1       | MYLK        | 1mux_A_pocket2                                                      | 1    | 0    | 1   | 0    | 0   | 0    | 0    | 0    | 0    | 0  | 0  | 0  | 0  | 0  | 0  | 0  | 0  | 0  | 0    | 0    | 1    | 0    | 0   | 0   | 0   | 0   | 0   | 73  |   |
| 36  | CALM1       | PDE1A       | 1qiv_A                                                              | 0    | 0    | 0   | 0    | 0   | 0    | 0    | 0    | 0    | 0  | 0  | 0  | 0  | 0  | 0  | 0  | 0  | 0  | 383  | 31   | 356  | 196  | 101 | 135 | 9   | 69  | 27  | 3   |   |
| 37  | CD4         | HLA-DQB1    | 1jld_D                                                              | 0    | 0    | 0   | 0    | 0   | 0    | 0    | 0    | 0    | 0  | 0  | 0  | 0  | 0  | 0  | 0  | 0  | 0  | 0    | 0    | 0    | 0    | 0   | 0   | 0   | 0   | 0   | 0   |   |
| 38  | CREBBP      | TP53        | 2d82_A                                                              | 0    | 0    | 0   | 0    | 0   | 0    | 0    | 1    | 0    | 0  | 0  | 0  | 0  | 0  | 0  | 0  | 0  | 0  | 0    | 3    | 0    | 0    | 0   | 2   | 0   | 0   | 0   | 1   | 4 |
| 39  | ESR1        | NCOA2       | 3erd_A                                                              | 0    | 0    | 0   | 0    | 0   | 0    | 0    | 0    | 0    | 0  | 0  | 0  | 0  | 0  | 0  | 0  | 0  | 0  | 0    | 0    | 0    | 0    | 0   | 0   | 0   | 0   | 0   | 0   |   |
| 40  | ESR1        | NCOA2       | 3erd_B                                                              | 22   | 0    | 4   | 0    | 9   | 0    | 0    | 0    | 0    | 0  | 0  | 0  | 0  | 0  | 0  | 0  | 0  | 0  | 0    | 0    | 0    | 0    | 0   | 0   | 0   | 0   | 0   | 1   |   |
| 41  | FKBP1A      | TGFBP1      | 1fkj_A                                                              | 70   | 1    | 26  | 0    | 8   | 0    | 0    | 0    | 0    | 0  | 0  | 0  | 0  | 0  | 0  | 0  | 0  | 0  | 455  | 279  | 95   | 80   | 10  | 49  | 0   | 21  | 0   | 45  |   |
| 42  | FKBP1A      | TGFBP1      | 1fkf_A                                                              | 44   | 1    | 11  | 0    | 5   | 0    | 0    | 0    | 0    | 0  | 0  | 0  | 0  | 0  | 0  | 0  | 0  | 0  | 636  | 353  | 247  | 133  | 23  | 53  | 0   | 24  | 0   | 48  |   |
| 43  | EGFR        | GRB2        | 1qj1_B                                                              | 0    | 0    | 0   | 0    | 0   | 0    | 0    | 0    | 0    | 0  | 0  | 0  | 0  | 0  | 0  | 0  | 0  | 0  | 0    | 0    | 0    | 0    | 0   | 0   | 0   | 0   | 0   | 0   |   |
| 44  | EGFR        | GRB2        | 1qj1_C                                                              | 0    | 0    | 0   | 0    | 0   | 0    | 0    | 0    | 0    | 0  | 0  | 0  | 0  | 0  | 0  | 0  | 0  | 0  | 0    | 0    | 0    | 0    | 0   | 0   | 0   | 0   | 0   | 0   |   |
| 45  | EGFR        | GRB2        | 1qj1_D                                                              | 0    | 0    | 0   | 0    | 0   | 0    | 0    | 0    | 0    | 0  | 0  | 0  | 0  | 0  | 0  | 0  | 0  | 0  | 0    | 0    | 0    | 0    | 0   | 0   | 0   | 0   | 0   | 0   |   |
| 46  | EGFR        | GRB2        | 1qj1_E                                                              | 0    | 0    | 0   | 0    | 0   | 0    | 0    | 0    | 0    | 0  | 0  | 0  | 0  | 0  | 0  | 0  | 0  | 0  | 0    | 0    | 0    | 0    | 0   | 0   | 0   | 0   | 0   | 0   |   |
| 47  | EGFR        | GRB2        | 1qj1_F                                                              | 0    | 0    | 0   | 0    | 0   | 0    | 0    | 0    | 0    | 0  | 0  | 0  | 0  | 0  | 0  | 0  | 0  | 0  | 0    | 0    | 0    | 0    | 0   | 0   | 0   | 0   | 0   | 0   |   |
| 48  | EGFR        | GRB2        | 1qj1_G                                                              | 0    | 0    | 0   | 0    | 0   | 0    | 0    | 0    | 0    | 0  | 0  | 0  | 0  | 0  | 0  | 0  | 0  | 0  | 0    | 0    | 0    | 0    | 0   | 0   | 0   | 0   | 0   | 0   |   |
| 49  | EGFR        | GRB2        | 1qj1_H                                                              | 0    | 0    | 0   | 0    | 0   | 0    | 0    | 0    | 0    | 0  | 0  | 0  | 0  | 0  | 0  | 0  | 0  | 0  | 0    | 0    | 0    | 0    | 0   | 0   | 0   | 0   | 0   | 0   |   |
| 50  | EGFR        | GRB2        | 1qj1_I                                                              | 0    | 0    | 0   | 0    | 0   | 0    | 0    | 0    | 0    | 0  | 0  | 0  | 0  | 0  | 0  | 0  | 0  | 0  | 0    | 0    | 0    | 0    | 0   | 0   | 0   | 0   | 0   | 0   |   |
| 51  | EGFR        | GRB2        | 1qj1_J                                                              | 0    | 0    | 0   | 0    | 0   | 0    | 0    | 0    | 0    | 0  | 0  | 0  | 0  | 0  | 0  | 0  | 0  | 0  | 0    | 0    | 0    | 0    | 0   | 0   | 0   | 0   | 0   | 0   |   |
| 52  | GRB2        | MET         | 1qj1_B                                                              | 0    | 0    | 0   | 0    | 0   | 0    | 0    | 0    | 0    | 0  | 0  | 0  | 0  | 0  | 0  | 0  | 0  | 0  | 0    | 0    | 0    | 0    | 0   | 0   | 0   | 0   | 0   | 0   |   |
| 53  | GRB2        | MET         | 1qj1_C                                                              | 0    | 0    | 0   | 0    | 0   | 0    | 0    | 0    | 0    | 0  | 0  | 0  | 0  | 0  | 0  | 0  | 0  | 0  | 0    | 0    | 0    | 0    | 0   | 0   | 0   | 0   | 0   | 0   |   |
| 54  | GRB2        | MET         | 1qj1_D                                                              | 0    | 0    | 0   | 0    | 0   | 0    | 0    | 0    | 0    | 0  | 0  | 0  | 0  | 0  | 0  | 0  | 0  | 0  | 0    | 0    | 0    | 0    | 0   | 0   | 0   | 0   | 0   | 0   |   |
| 55  | GRB2        | MET         | 1qj1_E                                                              | 0    | 0    | 0   | 0    | 0   | 0    | 0    | 0    | 0    | 0  | 0  | 0  | 0  | 0  | 0  | 0  | 0  | 0  | 0    | 0    | 0    | 0    | 0   | 0   | 0   | 0   | 0   | 0   |   |
| 56  | GRB2        | MET         | 1qj1_F                                                              | 0    | 0    | 0   | 0    | 0   | 0    | 0    | 0    | 0    | 0  | 0  | 0  | 0  | 0  | 0  | 0  | 0  | 0  | 0    | 0    | 0    | 0    | 0   | 0   | 0   | 0   | 0   | 0   |   |
| 57  | GRB2        | MET         | 1qj1_G                                                              | 0    | 0    | 0   | 0    | 0   | 0    | 0    | 0    | 0    | 0  | 0  |    |    |    |    |    |    |    |      |      |      |      |     |     |     |     |     |     |   |

When the druggability of a positive instance (in row) was assessed by our SVM-based method, the number of times each positive instance (in column) was located nearest to the assessed positive instance in a feature space was shown in a cell.

<sup>a</sup>For the details of the attributes and pocket-constituting amino acids of the positive instances used for our SVM-based method, see [http://www.drpias.net/positives\\_attributes.txt](http://www.drpias.net/positives_attributes.txt) and [http://www.drpias.net/positives\\_amino\\_acids.txt](http://www.drpias.net/positives_amino_acids.txt).

<sup>b</sup> Brefeldin-binding pocket.

<sup>6</sup> Target pocket in Viald,J., Zeghouf,M., Barelli,H., Zee,J.C., Padilla,A., Guibert,B., Chardin,P., Royer,C.A., Cherfils,J. and Chavanieu,A. (2007) Structure-based discovery of an inhibitor of Arf activation by Sec7 domains through targeting of protein-protein complexes. *Proc. Natl. Acad. Sci. U. S. A.*, **104**, 10370-10375.

Table S4. (continued)

| No. | Interactor1 | Interactor2 | PDB entries used for detecting the pockets located on PPI interface | 29  | 30   | 31   | 32   | 33   | 34 | 35 | 36   | 37   | 38   | 39   | 40  | 41   | 42   | 43   | 44   | 45   | 46   | 47   | 48   | 49   | 50  | 51 | 52 | 53 | 54 | 55 | 56 |
|-----|-------------|-------------|---------------------------------------------------------------------|-----|------|------|------|------|----|----|------|------|------|------|-----|------|------|------|------|------|------|------|------|------|-----|----|----|----|----|----|----|
| 1   | ARF1        | CYTH2       | 1s9d_A <sup>b</sup>                                                 | 0   | 0    | 4    | 31   | 207  | 0  | 0  | 0    | 0    | 0    | 0    | 8   | 8    | 16   | 0    | 0    | 0    | 0    | 0    | 0    | 0    | 0   | 0  | 0  | 0  | 0  | 0  | 0  |
| 2   | ARF1        | CYTH2       | 1s9d_E <sup>b</sup>                                                 | 0   | 0    | 0    | 22   | 12   | 0  | 0  | 0    | 0    | 0    | 0    | 0   | 7    | 2    | 0    | 0    | 0    | 0    | 0    | 0    | 0    | 0   | 0  | 0  | 0  | 0  | 0  | 0  |
| 3   | ARF1        | CYTH2       | 1r8q_A <sup>b</sup>                                                 | 0   | 0    | 0    | 0    | 3    | 0  | 0  | 0    | 0    | 0    | 11   | 85  | 309  | 25   | 0    | 0    | 0    | 0    | 0    | 0    | 0    | 0   | 0  | 0  | 0  | 0  | 0  | 0  |
| 4   | ARF1        | CYTH2       | 1r8q_E <sup>b</sup>                                                 | 0   | 0    | 0    | 0    | 10   | 0  | 0  | 0    | 0    | 0    | 1    | 0   | 0    | 0    | 0    | 0    | 0    | 0    | 0    | 0    | 0    | 0   | 0  | 0  | 0  | 0  | 0  | 0  |
| 5   | ARF1        | CYTH2       | 1r8q_B <sup>b</sup>                                                 | 0   | 0    | 0    | 0    | 1    | 0  | 0  | 0    | 0    | 0    | 6    | 45  | 30   | 1    | 0    | 0    | 0    | 0    | 0    | 0    | 0    | 0   | 0  | 0  | 0  | 0  | 0  | 0  |
| 6   | ARF1        | CYTH2       | 1r8q_F <sup>b</sup>                                                 | 0   | 0    | 0    | 0    | 4    | 0  | 0  | 0    | 0    | 0    | 0    | 0   | 0    | 0    | 0    | 0    | 0    | 0    | 0    | 0    | 0    | 0   | 0  | 0  | 0  | 0  | 0  | 0  |
| 7   | ARF1        | CYTH2       | 1r8q_BF <sup>c</sup>                                                | 0   | 0    | 0    | 0    | 0    | 0  | 0  | 0    | 3    | 0    | 0    | 0   | 0    | 0    | 0    | 0    | 0    | 0    | 0    | 0    | 0    | 0   | 0  | 0  | 0  | 0  | 0  | 0  |
| 8   | ARF1        | CYTH2       | 1s9d_AE <sup>c</sup>                                                | 0   | 0    | 0    | 0    | 0    | 0  | 0  | 0    | 4    | 0    | 2    | 0   | 0    | 0    | 0    | 0    | 0    | 0    | 0    | 0    | 0    | 0   | 0  | 0  | 0  | 0  | 0  | 0  |
| 9   | ARF1        | CYTH2       | 1r8s_AE <sup>c</sup>                                                | 0   | 0    | 0    | 0    | 0    | 0  | 0  | 0    | 0    | 0    | 0    | 0   | 0    | 0    | 0    | 0    | 0    | 0    | 0    | 0    | 0    | 0   | 0  | 0  | 0  | 0  | 0  | 0  |
| 10  | ARF1        | CYTH1       | 1s9d_A <sup>b</sup>                                                 | 0   | 0    | 4    | 31   | 207  | 0  | 0  | 0    | 0    | 0    | 0    | 8   | 8    | 16   | 0    | 0    | 0    | 0    | 0    | 0    | 0    | 0   | 0  | 0  | 0  | 0  | 0  | 0  |
| 11  | ARF1        | CYTH1       | 1s9d_E <sup>b</sup>                                                 | 0   | 0    | 0    | 22   | 12   | 0  | 0  | 0    | 0    | 0    | 0    | 7   | 2    | 0    | 0    | 0    | 0    | 0    | 0    | 0    | 0    | 0   | 0  | 0  | 0  | 0  | 0  | 0  |
| 12  | ARF1        | CYTH1       | 1r8q_A <sup>b</sup>                                                 | 0   | 0    | 0    | 0    | 3    | 0  | 0  | 0    | 0    | 0    | 11   | 85  | 309  | 25   | 0    | 0    | 0    | 0    | 0    | 0    | 0    | 0   | 0  | 0  | 0  | 0  | 0  | 0  |
| 13  | ARF1        | CYTH1       | 1r8q_E <sup>b</sup>                                                 | 0   | 0    | 0    | 0    | 10   | 0  | 0  | 0    | 0    | 0    | 1    | 0   | 0    | 0    | 0    | 0    | 0    | 0    | 0    | 0    | 0    | 0   | 0  | 0  | 0  | 0  | 0  | 0  |
| 14  | ARF1        | CYTH1       | 1r8q_B <sup>b</sup>                                                 | 0   | 0    | 0    | 0    | 1    | 0  | 0  | 0    | 0    | 0    | 6    | 45  | 30   | 1    | 0    | 0    | 0    | 0    | 0    | 0    | 0    | 0   | 0  | 0  | 0  | 0  | 0  | 0  |
| 15  | ARF1        | CYTH1       | 1r8q_F <sup>b</sup>                                                 | 0   | 0    | 0    | 0    | 4    | 0  | 0  | 0    | 0    | 0    | 0    | 0   | 0    | 0    | 0    | 0    | 0    | 0    | 0    | 0    | 0    | 0   | 0  | 0  | 0  | 0  | 0  | 0  |
| 16  | ARF1        | CYTH1       | 1r8q_BF <sup>c</sup>                                                | 0   | 0    | 0    | 0    | 0    | 0  | 0  | 0    | 3    | 0    | 0    | 0   | 0    | 0    | 0    | 0    | 0    | 0    | 0    | 0    | 0    | 0   | 0  | 0  | 0  | 0  | 0  | 0  |
| 17  | ARF1        | CYTH1       | 1s9d_AE <sup>c</sup>                                                | 0   | 0    | 0    | 0    | 0    | 0  | 0  | 0    | 4    | 0    | 2    | 0   | 0    | 0    | 0    | 0    | 0    | 0    | 0    | 0    | 0    | 0   | 0  | 0  | 0  | 0  | 0  | 0  |
| 18  | ARF1        | CYTH1       | 1r8s_AE <sup>c</sup>                                                | 0   | 0    | 0    | 0    | 0    | 0  | 0  | 0    | 0    | 0    | 0    | 0   | 0    | 0    | 0    | 0    | 0    | 0    | 0    | 0    | 0    | 0   | 0  | 0  | 0  | 0  | 0  | 0  |
| 19  | BAK1        | BCL2        | 2o2f_A                                                              | 98  | 248  | 253  | 0    | 4    | 0  | 0  | 0    | 10   | 1    | 0    | 165 | 199  | 0    | 2    | 0    | 0    | 0    | 1    | 0    | 0    | 0   | 1  | 0  | 0  | 0  | 0  | 0  |
| 20  | BAK1        | BCL2        | 2o22_A                                                              | 149 | 243  | 245  | 0    | 2    | 0  | 0  | 0    | 5    | 1    | 0    | 123 | 119  | 0    | 0    | 0    | 0    | 0    | 0    | 0    | 0    | 0   | 0  | 0  | 0  | 0  | 0  | 0  |
| 21  | BAK1        | BCL2        | 2o21_A                                                              | 153 | 237  | 290  | 1    | 32   | 0  | 0  | 0    | 19   | 3    | 0    | 117 | 125  | 0    | 0    | 0    | 0    | 0    | 0    | 0    | 0    | 0   | 0  | 0  | 0  | 0  | 0  | 0  |
| 22  | BAK1        | BCL2        | 1ysw_A                                                              | 151 | 236  | 302  | 2    | 32   | 0  | 0  | 0    | 15   | 3    | 0    | 123 | 124  | 0    | 0    | 0    | 0    | 0    | 0    | 0    | 0    | 0   | 0  | 0  | 0  | 0  | 0  | 0  |
| 23  | BAK1        | BCL2L1      | 2o2n_A                                                              | 18  | 882  | 792  | 0    | 0    | 0  | 0  | 0    | 1    | 8    | 0    | 4   | 3    | 0    | 0    | 0    | 0    | 0    | 0    | 0    | 0    | 0   | 0  | 0  | 0  | 0  | 0  | 0  |
| 24  | BAK1        | BCL2L1      | 2o2m_A                                                              | 115 | 374  | 860  | 0    | 0    | 0  | 0  | 0    | 0    | 23   | 0    | 70  | 34   | 0    | 0    | 0    | 0    | 0    | 0    | 0    | 0    | 0   | 0  | 0  | 0  | 0  | 0  | 0  |
| 25  | BAK1        | BCL2L1      | 2yxj_A                                                              | 88  | 789  | 1772 | 0    | 0    | 0  | 0  | 0    | 21   | 24   | 0    | 11  | 7    | 0    | 0    | 0    | 0    | 0    | 0    | 0    | 0    | 0   | 0  | 0  | 0  | 0  | 0  | 0  |
| 26  | BAK1        | BCL2L1      | 2yxj_B                                                              | 6   | 862  | 1577 | 0    | 0    | 0  | 0  | 0    | 11   | 10   | 0    | 186 | 175  | 1    | 5    | 1    | 4    | 2    | 2    | 2    | 2    | 0   | 1  | 0  | 0  | 0  | 0  | 0  |
| 27  | BAK1        | BCL2L1      | 1ysi_A                                                              | 10  | 851  | 1452 | 0    | 0    | 0  | 0  | 0    | 4    | 27   | 0    | 7   | 1    | 0    | 0    | 0    | 0    | 0    | 0    | 0    | 0    | 0   | 0  | 0  | 0  | 0  | 0  | 0  |
| 28  | BAK1        | BCL2L1      | 2w3l_A                                                              | 892 | 21   | 26   | 36   | 1081 | 0  | 0  | 0    | 6    | 9    | 0    | 61  | 23   | 0    | 0    | 0    | 0    | 0    | 0    | 0    | 0    | 0   | 0  | 0  | 0  | 0  | 0  | 0  |
| 29  | BAK1        | BCL2L1      | 2w3l_B                                                              | 900 | 5    | 51   | 69   | 983  | 0  | 0  | 0    | 1    | 8    | 6    | 0   | 34   | 20   | 0    | 0    | 0    | 0    | 0    | 0    | 0    | 0   | 0  | 0  | 0  | 0  | 0  | 0  |
| 30  | BAK1        | BCL2L1      | 3inq_A                                                              | 18  | 1019 | 1126 | 0    | 0    | 0  | 0  | 0    | 3    | 2    | 0    | 152 | 154  | 0    | 1    | 0    | 0    | 0    | 0    | 0    | 4    | 0   | 0  | 0  | 0  | 0  | 0  | 0  |
| 31  | BAK1        | BCL2L1      | 3inq_B                                                              | 125 | 641  | 1902 | 0    | 0    | 0  | 0  | 0    | 4    | 18   | 0    | 56  | 59   | 0    | 0    | 0    | 0    | 0    | 0    | 0    | 0    | 0   | 0  | 0  | 0  | 0  | 0  | 0  |
| 32  | CALM1       | CAMK1       | 1mux_A_pocket1                                                      | 0   | 0    | 0    | 5916 | 3066 | 0  | 0  | 0    | 0    | 112  | 182  | 9   | 2    | 0    | 0    | 0    | 0    | 0    | 0    | 0    | 0    | 0   | 0  | 0  | 0  | 0  | 0  | 0  |
| 33  | CALM1       | CAMK1       | 1mux_A_pocket2                                                      | 50  | 0    | 0    | 3230 | 5667 | 0  | 0  | 0    | 0    | 178  | 223  | 2   | 1    | 0    | 0    | 0    | 0    | 0    | 0    | 0    | 0    | 0   | 0  | 0  | 0  | 0  | 0  | 0  |
| 34  | CALM1       | MYLK        | 1mux_A_pocket1                                                      | 21  | 0    | 0    | 5916 | 3066 | 0  | 0  | 0    | 0    | 112  | 182  | 9   | 2    | 0    | 0    | 0    | 0    | 0    | 0    | 0    | 0    | 0   | 0  | 0  | 0  | 0  | 0  | 0  |
| 35  | CALM1       | MYLK        | 1mux_A_pocket2                                                      | 50  | 0    | 0    | 3230 | 5667 | 0  | 0  | 0    | 0    | 178  | 223  | 2   | 1    | 0    | 0    | 0    | 0    | 0    | 0    | 0    | 0    | 0   | 0  | 0  | 0  | 0  | 0  | 0  |
| 36  | CALM1       | PDE1A       | 1qiv_A                                                              | 5   | 101  | 33   | 0    | 99   | 0  | 0  | 7105 | 0    | 2    | 4    | 91  | 178  | 166  | 0    | 1    | 0    | 0    | 0    | 0    | 0    | 0   | 0  | 0  | 0  | 0  | 0  | 0  |
| 37  | CD4         | HLA-DQB1    | 1jjd_D                                                              | 0   | 0    | 0    | 0    | 0    | 0  | 0  | 7952 | 0    | 11   | 0    | 0   | 0    | 0    | 0    | 0    | 0    | 0    | 0    | 0    | 0    | 0   | 0  | 0  | 0  | 0  | 0  | 0  |
| 38  | CREBBP      | TP53        | 2d82_A                                                              | 0   | 0    | 0    | 0    | 0    | 0  | 0  | 0    | 9388 | 63   | 0    | 0   | 0    | 0    | 0    | 0    | 0    | 0    | 0    | 0    | 0    | 0   | 0  | 0  | 0  | 0  | 0  | 0  |
| 39  | ESR1        | NCOA2       | 3erd_A                                                              | 0   | 0    | 0    | 0    | 0    | 0  | 0  | 8    | 3    | 4483 | 455  | 0   | 0    | 0    | 0    | 0    | 0    | 0    | 0    | 0    | 0    | 0   | 0  | 0  | 0  | 0  | 0  | 0  |
| 40  | ESR1        | NCOA2       | 3erd_B                                                              | 0   | 0    | 0    | 52   | 1091 | 0  | 0  | 0    | 0    | 2746 | 3974 | 0   | 0    | 0    | 0    | 0    | 0    | 0    | 0    | 0    | 0    | 0   | 0  | 0  | 0  | 0  | 0  | 0  |
| 41  | FKBP1A      | TGFBP1      | 1fkf_A                                                              | 0   | 27   | 1    | 0    | 0    | 0  | 0  | 0    | 0    | 0    | 0    | 1   | 3853 | 2397 | 14   | 19   | 6    | 12   | 15   | 23   | 15   | 6   | 15 | 0  | 0  | 0  | 0  | 0  |
| 42  | FKBP1A      | TGFBP1      | 1fkf_A                                                              | 5   | 57   | 9    | 0    | 1    | 0  | 0  | 0    | 0    | 0    | 0    | 0   | 3753 | 2493 | 15   | 20   | 9    | 11   | 13   | 15   | 8    | 5   | 11 | 0  | 0  | 0  | 0  | 0  |
| 43  | EGFR        | GRB2        | 1c1j_B                                                              | 0   | 0    | 0    | 0    | 0    | 0  | 0  | 0    | 0    | 0    | 0    | 0   | 0    | 1498 | 1183 | 1201 | 586  | 1256 | 1098 | 1120 | 187  | 895 | 0  | 0  | 0  | 0  | 0  | 0  |
| 44  | EGFR        | GRB2        | 1c1j_C                                                              | 0   | 0    | 0    | 0    | 0    | 0  | 0  | 0    | 0    | 0    | 0    | 0   | 0    | 1338 | 1512 | 895  | 1026 | 961  | 1237 | 1117 | 187  | 756 | 0  | 0  | 0  | 0  | 0  | 0  |
| 45  | EGFR        | GRB2        | 1c1j_D                                                              | 0   | 0    | 0    | 0    | 0    | 0  | 0  | 0    | 0    | 0    | 0    | 0   | 0    | 1044 | 785  | 1532 | 422  | 1554 | 1336 | 1344 | 187  | 817 | 0  | 0  | 0  | 0  | 0  | 0  |
| 46  | EGFR        | GRB2        | 1c1j_E                                                              | 0   | 0    | 0    | 0    | 0    | 0  | 0  | 0    | 0    | 0    | 0    | 0   | 0    | 1062 | 1416 | 848  | 1342 | 820  | 996  | 938  | 1020 | 602 | 0  | 0  | 0  | 0  | 0  | 0  |
| 47  | EGFR        | GRB2        | 1c1j_F                                                              | 0   | 0    | 0    | 0    | 0    | 0  | 0  | 0    | 0    | 0    | 0    | 0   | 0    | 894  | 722  | 1439 | 420  | 1635 | 1406 | 1641 | 187  | 659 | 0  | 0  | 0  | 0  | 0  | 0  |
| 48  | EGFR        | GRB2        | 1c1j_G                                                              | 0   | 0    | 0    | 0    | 0    | 0  | 0  | 0    | 0    | 0    | 0    | 0   | 0    | 745  | 986  | 1212 | 419  | 1489 | 1711 | 1712 | 187  | 544 | 0  | 0  | 0  | 0  | 0  | 0  |
| 49  | EGFR        | GRB2        | 1c1j_H                                                              | 0   | 0    | 0    | 0    | 0    | 0  | 0  | 0    | 0    | 0    | 0    | 0   | 0    | 966  | 758  | 1211 | 419  | 1530 | 1459 | 1915 | 185  | 547 | 0  | 0  | 0  | 0  | 0  | 0  |
| 50  | EGFR        | GRB2        | 1c1j_I                                                              | 0   | 0    | 0    | 0    | 0    | 0  | 0  | 0    | 0    | 0    | 0    | 0   | 0    | 1143 | 999  | 852  | 1190 | 960  | 853  | 939  | 1327 | 790 | 0  | 0  | 0  | 0  | 0  | 0  |
| 51  | EGFR        | GRB2        | 1c1j_J                                                              | 0   | 0    | 0    | 0    | 0    | 0  | 0  | 0    | 0    | 0    | 0    | 0   | 0    | 1403 | 1095 | 1280 | 577  | 1265 | 1106 | 1120 | 189  | 991 | 0  | 0  | 0  | 0  | 0  | 0  |
| 52  | GRB2        | MET         | 1c1j_B                                                              | 0   | 0    | 0    | 0    | 0    | 0  | 0  | 0    | 0    | 0    | 0    | 0   | 0    | 1498 | 1183 | 1201 | 586  | 1256 | 1098 | 1120 | 187  | 895 | 0  | 0  | 0  | 0  | 0  | 0  |
| 53  | GRB2        | MET         | 1c1j_C                                                              | 0   | 0    | 0    | 0    | 0    | 0  | 0  | 0    | 0    | 0    | 0    | 0   | 0    | 1338 | 1512 | 895  | 1026 | 961  | 1237 | 1117 | 187  | 756 | 0  | 0  | 0  | 0  | 0  | 0  |
| 54  | GRB2        | MET         | 1c1j_D                                                              | 0   | 0    | 0    | 0    | 0    | 0  | 0  | 0    | 0    | 0    | 0    | 0   | 0    | 1044 | 785  | 1532 | 422  | 1554 | 1336 | 1344 | 187  | 817 | 0  | 0  | 0  | 0  | 0  | 0  |
| 55  | GRB2        | MET         | 1c1j_E                                                              | 0   | 0    | 0    | 0    | 0    | 0  | 0  | 0    | 0    | 0    | 0    | 0   | 0    | 1062 | 1416 | 848  | 1342 | 820  | 996  | 938  | 1020 | 602 | 0  | 0  | 0  | 0  | 0  | 0  |
| 56  | GRB2        | MET         | 1c1j_F                                                              | 0   | 0    | 0    | 0    | 0    | 0  | 0  | 0    | 0    | 0    | 0    | 0   | 0    | 894  | 722  | 1439 | 420  | 1635 | 1406 | 1641 | 187  | 659 | 0  | 0  | 0  | 0  | 0  | 0  |
| 57  | GRB2        | MET         | 1c                                                                  |     |      |      |      |      |    |    |      |      |      |      |     |      |      |      |      |      |      |      |      |      |     |    |    |    |    |    |    |

When the druggability of a positive instance (in row) was assessed by our SVM-based method, the number of times each positive instance (in column) was located nearest to the assessed positive instance in a feature space was shown in a cell.

<sup>a</sup>For the details of the attributes and pocket-constituting amino acids of the positive instances used for our SVM-based method, see [http://www.drpias.net/positives\\_attributes.txt](http://www.drpias.net/positives_attributes.txt) and [http://www.drpias.net/positives\\_amino\\_acids.txt](http://www.drpias.net/positives_amino_acids.txt).

<sup>b</sup> Brefeldin-binding pocket.

<sup>c</sup>Target pocket in Viaud,J., Zeghouf,M., Barelli,H., Zee,J.C., Padilla,A., Guibert,B., Chardin,P., Royer,C.A., Cherfils,J. and Chavanieu,A. (2007) Structure-based discovery of an inhibitor of Arf activation by Sec7 domains through targeting of protein-protein complexes. *Proc. Natl. Acad. Sci. U. S. A.* **104**, 10370-10375.

Table S4. (continued)

[illegible]

When the druggability of a positive instance (in row) was assessed by our SVM-based method, the number of times each positive instance (in column) was located nearest to the assessed positive instance in a feature space was shown in a cell.

<sup>a</sup>For the details of the attributes and pocket-constituting amino acids of the positive instances used for our SVM-based method, see [http://www.drpias.net/positives\\_attributes.txt](http://www.drpias.net/positives_attributes.txt) and [http://www.drpias.net/positives\\_amino\\_acids.txt](http://www.drpias.net/positives_amino_acids.txt).

<sup>b</sup> Brefeldin-binding pocket.

<sup>c</sup>Target pocket in Viaud,J., Zeghouf,M., Barelli,H., Zee,J.C., Padilla,A., Guibert,B., Chardin,P., Royer,C.A., Cherfils,J. and Chavanieu,A. (2007) Structure-based discovery of an inhibitor of Arf activation by Sec7 domains through targeting of protein-protein complexes. *Proc. Natl. Acad. Sci. U. S. A.* **104**, 10370-10375

Table S4. (continued)

| No. | Interactor1 | Interactor2 | PDB entries used for detecting the pockets located on PPI interface | 85   | 86 | 87 | 88 | 89 | 90  | 91  | 92 | 93 | 94 | 95 | 96  | 97 | 98  | 99 | 100 | 101 | 102  | 103 | 104 | 105 | 106 | 107 | 108 | 109 | 110 | 111  | 112 |   |
|-----|-------------|-------------|---------------------------------------------------------------------|------|----|----|----|----|-----|-----|----|----|----|----|-----|----|-----|----|-----|-----|------|-----|-----|-----|-----|-----|-----|-----|-----|------|-----|---|
| 1   | ARF1        | CYTH2       | 1s9d_A <sup>a</sup>                                                 | 509  | 23 | 36 | 0  | 0  | 0   | 2   | 0  | 0  | 0  | 0  | 0   | 0  | 0   | 0  | 0   | 0   | 0    | 0   | 0   | 0   | 0   | 0   | 0   | 0   | 501 | 591  | 11  |   |
| 2   | ARF1        | CYTH2       | 1s9d_E <sup>b</sup>                                                 | 0    | 0  | 0  | 0  | 0  | 4   | 1   | 0  | 0  | 0  | 0  | 0   | 0  | 0   | 0  | 0   | 0   | 0    | 0   | 0   | 0   | 0   | 0   | 0   | 0   | 0   | 0    | 0   |   |
| 3   | ARF1        | CYTH2       | 1r6q_A <sup>b</sup>                                                 | 1178 | 1  | 0  | 0  | 0  | 36  | 13  | 0  | 0  | 0  | 0  | 0   | 0  | 0   | 0  | 0   | 0   | 0    | 0   | 0   | 0   | 0   | 0   | 0   | 0   | 81  | 1150 | 236 |   |
| 4   | ARF1        | CYTH2       | 1r6q_E <sup>b</sup>                                                 | 11   | 0  | 0  | 0  | 0  | 250 | 16  | 0  | 0  | 0  | 0  | 0   | 0  | 0   | 0  | 0   | 0   | 0    | 0   | 0   | 0   | 0   | 0   | 0   | 0   | 0   | 0    | 0   |   |
| 5   | ARF1        | CYTH2       | 1r6q_B <sup>b</sup>                                                 | 2079 | 0  | 0  | 0  | 0  | 4   | 5   | 0  | 0  | 0  | 0  | 0   | 0  | 0   | 0  | 0   | 0   | 0    | 0   | 0   | 0   | 0   | 0   | 0   | 0   | 82  | 1015 | 94  |   |
| 6   | ARF1        | CYTH2       | 1r6q_F <sup>b</sup>                                                 | 19   | 0  | 0  | 0  | 0  | 301 | 18  | 0  | 0  | 0  | 0  | 0   | 0  | 0   | 0  | 0   | 0   | 0    | 0   | 0   | 0   | 0   | 0   | 0   | 0   | 0   | 0    | 0   |   |
| 7   | ARF1        | CYTH2       | 1r6q_BF <sup>c</sup>                                                | 1    | 16 | 5  | 26 | 2  | 0   | 0   | 0  | 0  | 0  | 0  | 0   | 0  | 0   | 34 | 20  | 0   | 0    | 0   | 0   | 0   | 0   | 0   | 0   | 0   | 5   | 0    | 0   |   |
| 8   | ARF1        | CYTH2       | 1s9d_AE <sup>c</sup>                                                | 0    | 0  | 1  | 6  | 0  | 2   | 0   | 0  | 0  | 0  | 0  | 0   | 0  | 0   | 4  | 1   | 0   | 0    | 0   | 0   | 0   | 0   | 0   | 0   | 0   | 0   | 0    | 0   |   |
| 9   | ARF1        | CYTH2       | 1r6s_AE <sup>c</sup>                                                | 0    | 14 | 9  | 33 | 0  | 0   | 0   | 0  | 0  | 0  | 0  | 0   | 0  | 0   | 21 | 15  | 0   | 0    | 0   | 0   | 0   | 0   | 0   | 0   | 0   | 8   | 1    | 0   |   |
| 10  | ARF1        | CYTH1       | 1s9d_A <sup>b</sup>                                                 | 509  | 23 | 36 | 0  | 0  | 0   | 2   | 0  | 0  | 0  | 0  | 0   | 0  | 0   | 0  | 0   | 0   | 0    | 0   | 0   | 0   | 0   | 0   | 0   | 0   | 501 | 591  | 11  |   |
| 11  | ARF1        | CYTH1       | 1s9d_E <sup>b</sup>                                                 | 0    | 0  | 0  | 0  | 0  | 4   | 1   | 0  | 0  | 0  | 0  | 0   | 0  | 0   | 0  | 0   | 0   | 0    | 0   | 0   | 0   | 0   | 0   | 0   | 0   | 0   | 0    | 0   |   |
| 12  | ARF1        | CYTH1       | 1r6q_A <sup>b</sup>                                                 | 1178 | 1  | 0  | 0  | 0  | 36  | 13  | 0  | 0  | 0  | 0  | 0   | 0  | 0   | 0  | 0   | 0   | 0    | 0   | 0   | 0   | 0   | 0   | 0   | 0   | 81  | 1150 | 236 |   |
| 13  | ARF1        | CYTH1       | 1r6q_E <sup>b</sup>                                                 | 11   | 0  | 0  | 0  | 0  | 250 | 16  | 0  | 0  | 0  | 0  | 0   | 0  | 0   | 0  | 0   | 0   | 0    | 0   | 0   | 0   | 0   | 0   | 0   | 0   | 0   | 0    | 0   |   |
| 14  | ARF1        | CYTH1       | 1r6q_B <sup>b</sup>                                                 | 2079 | 0  | 0  | 0  | 0  | 4   | 5   | 0  | 0  | 0  | 0  | 0   | 0  | 0   | 0  | 0   | 0   | 0    | 0   | 0   | 0   | 0   | 0   | 0   | 0   | 82  | 1015 | 94  |   |
| 15  | ARF1        | CYTH1       | 1r6q_F <sup>b</sup>                                                 | 19   | 0  | 0  | 0  | 0  | 301 | 18  | 0  | 0  | 0  | 0  | 0   | 0  | 0   | 0  | 0   | 0   | 0    | 0   | 0   | 0   | 0   | 0   | 0   | 0   | 0   | 0    | 0   |   |
| 16  | ARF1        | CYTH1       | 1r6q_BF <sup>c</sup>                                                | 1    | 16 | 5  | 26 | 2  | 0   | 0   | 0  | 0  | 0  | 0  | 0   | 0  | 0   | 34 | 20  | 0   | 0    | 0   | 0   | 0   | 0   | 0   | 0   | 0   | 5   | 0    | 0   |   |
| 17  | ARF1        | CYTH1       | 1s9d_AE <sup>c</sup>                                                | 0    | 0  | 1  | 6  | 0  | 2   | 0   | 0  | 0  | 0  | 0  | 0   | 0  | 0   | 4  | 1   | 0   | 0    | 0   | 0   | 0   | 0   | 0   | 0   | 0   | 0   | 0    | 0   |   |
| 18  | ARF1        | CYTH1       | 1r6s_AE <sup>c</sup>                                                | 0    | 14 | 9  | 33 | 0  | 0   | 0   | 0  | 0  | 0  | 0  | 0   | 0  | 0   | 21 | 15  | 0   | 0    | 0   | 0   | 0   | 0   | 0   | 0   | 0   | 8   | 1    | 0   |   |
| 19  | BAK1        | BCL2        | 2o2f_A                                                              | 9    | 19 | 14 | 12 | 0  | 0   | 11  | 0  | 5  | 4  | 13 | 4   | 1  | 6   | 0  | 0   | 0   | 0    | 0   | 0   | 0   | 0   | 0   | 0   | 0   | 0   | 0    | 6   | 0 |
| 20  | BAK1        | BCL2        | 2o22_A                                                              | 2    | 5  | 8  | 4  | 0  | 2   | 2   | 0  | 4  | 1  | 17 | 6   | 3  | 6   | 0  | 0   | 0   | 0    | 0   | 0   | 0   | 0   | 0   | 2   | 0   | 2   | 2    | 0   |   |
| 21  | BAK1        | BCL2        | 2o21_A                                                              | 6    | 23 | 17 | 3  | 0  | 4   | 82  | 0  | 1  | 4  | 16 | 5   | 8  | 17  | 0  | 0   | 0   | 0    | 4   | 0   | 0   | 0   | 0   | 0   | 0   | 0   | 0    | 0   |   |
| 22  | BAK1        | BCL2        | 1ysw_A                                                              | 1    | 24 | 14 | 3  | 0  | 4   | 100 | 0  | 2  | 3  | 11 | 3   | 6  | 11  | 0  | 0   | 0   | 4    | 0   | 0   | 0   | 0   | 0   | 0   | 0   | 0   | 0    | 0   |   |
| 23  | BAK1        | BCL2L1      | 2o2n_A                                                              | 0    | 17 | 24 | 11 | 0  | 0   | 2   | 0  | 0  | 0  | 1  | 1   | 0  | 0   | 0  | 0   | 0   | 0    | 0   | 0   | 0   | 0   | 1   | 0   | 0   | 0   | 0    | 0   |   |
| 24  | BAK1        | BCL2L1      | 2o2m_A                                                              | 0    | 0  | 0  | 0  | 0  | 0   | 5   | 0  | 1  | 6  | 12 | 22  | 3  | 2   | 0  | 0   | 0   | 2    | 0   | 0   | 0   | 0   | 0   | 0   | 0   | 0   | 0    | 0   |   |
| 25  | BAK1        | BCL2L1      | 2yxi_A                                                              | 0    | 15 | 12 | 9  | 0  | 0   | 12  | 0  | 2  | 0  | 5  | 49  | 0  | 0   | 0  | 0   | 0   | 0    | 0   | 0   | 0   | 0   | 2   | 0   | 0   | 0   | 0    | 0   |   |
| 26  | BAK1        | BCL2L1      | 2yxi_B                                                              | 0    | 5  | 13 | 0  | 0  | 0   | 5   | 0  | 18 | 17 | 12 | 123 | 0  | 0   | 0  | 0   | 0   | 22   | 0   | 0   | 0   | 0   | 0   | 0   | 0   | 0   | 0    | 0   |   |
| 27  | BAK1        | BCL2L1      | 1ysi_A                                                              | 0    | 43 | 54 | 8  | 0  | 0   | 16  | 0  | 2  | 0  | 2  | 40  | 0  | 0   | 0  | 0   | 0   | 0    | 0   | 0   | 0   | 0   | 0   | 0   | 0   | 0   | 0    | 0   |   |
| 28  | BAK1        | BCL2L1      | 2w3l_A                                                              | 0    | 0  | 0  | 0  | 0  | 252 | 142 | 0  | 6  | 9  | 57 | 8   | 22 | 50  | 0  | 0   | 0   | 11   | 0   | 0   | 0   | 1   | 0   | 2   | 0   | 0   | 0    | 0   |   |
| 29  | BAK1        | BCL2L1      | 2w3l_B                                                              | 0    | 0  | 0  | 0  | 0  | 123 | 59  | 0  | 1  | 1  | 96 | 8   | 46 | 102 | 0  | 0   | 0   | 0    | 0   | 0   | 0   | 5   | 0   | 1   | 0   | 0   | 0    | 0   |   |
| 30  | BAK1        | BCL2L1      | 3inq_A                                                              | 0    | 7  | 37 | 7  | 0  | 0   | 15  | 0  | 18 | 13 | 14 | 17  | 0  | 0   | 0  | 0   | 1   | 0    | 0   | 0   | 1   | 0   | 1   | 0   | 1   | 0   | 0    | 0   |   |
| 31  | BAK1        | BCL2L1      | 3inq_B                                                              | 0    | 8  | 0  | 2  | 0  | 0   | 77  | 0  | 0  | 3  | 19 | 26  | 0  | 0   | 0  | 0   | 0   | 0    | 0   | 0   | 0   | 2   | 0   | 0   | 0   | 0   | 0    | 0   |   |
| 32  | CALM1       | CAMK1       | 1mux_A pocket1                                                      | 0    | 0  | 0  | 0  | 0  | 247 | 48  | 0  | 0  | 0  | 0  | 0   | 0  | 0   | 0  | 0   | 0   | 25   | 0   | 0   | 0   | 0   | 0   | 0   | 0   | 0   | 0    | 0   |   |
| 33  | CALM1       | CAMK1       | 1mux_A pocket2                                                      | 0    | 0  | 0  | 0  | 0  | 197 | 54  | 0  | 0  | 0  | 0  | 0   | 0  | 1   | 0  | 0   | 0   | 4    | 0   | 0   | 0   | 0   | 0   | 0   | 0   | 0   | 0    | 0   |   |
| 34  | CALM1       | MYLK        | 1mux_A pocket1                                                      | 0    | 0  | 0  | 0  | 0  | 247 | 48  | 0  | 0  | 0  | 0  | 0   | 0  | 0   | 0  | 0   | 0   | 25   | 0   | 0   | 0   | 0   | 0   | 0   | 0   | 0   | 0    | 0   |   |
| 35  | CALM1       | MYLK        | 1mux_A pocket2                                                      | 0    | 0  | 0  | 0  | 0  | 197 | 54  | 0  | 0  | 0  | 0  | 0   | 0  | 1   | 0  | 0   | 0   | 4    | 0   | 0   | 0   | 0   | 0   | 0   | 0   | 0   | 0    | 0   |   |
| 36  | CALM1       | PDE1A       | 1qiv_A                                                              | 1    | 0  | 0  | 0  | 13 | 0   | 0   | 0  | 24 | 45 | 32 | 26  | 59 | 156 | 0  | 0   | 0   | 50   | 0   | 0   | 0   | 0   | 0   | 0   | 0   | 0   | 0    | 0   |   |
| 37  | CD4         | HLA-DQB1    | 1j14_D                                                              | 0    | 0  | 0  | 0  | 0  | 0   | 0   | 0  | 0  | 0  | 0  | 0   | 0  | 0   | 0  | 0   | 0   | 3    | 0   | 0   | 0   | 0   | 1   | 0   | 1   | 0   | 0    |     |   |
| 38  | CREBBP      | TP53        | 2d82_A                                                              | 0    | 0  | 0  | 0  | 0  | 0   | 0   | 0  | 0  | 0  | 0  | 0   | 0  | 0   | 0  | 0   | 9   | 0    | 0   | 0   | 0   | 114 | 0   | 193 | 0   | 0   | 0    |     |   |
| 39  | ESR1        | NCOA2       | 3eod_A                                                              | 0    | 0  | 0  | 0  | 0  | 1   | 4   | 0  | 0  | 0  | 0  | 0   | 0  | 0   | 0  | 0   | 0   | 1449 | 0   | 0   | 0   | 0   | 0   | 0   | 0   | 0   | 0    | 0   |   |
| 40  | ESR1        | NCOA2       | 3eod_B                                                              | 0    | 0  | 0  | 0  | 0  | 19  | 12  | 0  | 0  | 0  | 0  | 0   | 0  | 0   | 0  | 0   | 28  | 0    | 1   | 0   | 0   | 0   | 0   | 0   | 0   | 48  | 4    | 0   |   |
| 41  | FKBP1A      | TGFB1       | 1fkj_A                                                              | 0    | 0  | 0  | 0  | 0  | 0   | 0   | 0  | 12 | 11 | 9  | 2   | 3  | 1   | 0  | 0   | 0   | 141  | 0   | 0   | 0   | 0   | 0   | 0   | 0   | 0   | 1    | 0   |   |
| 42  | FKBP1A      | TGFB1       | 1fkf_A                                                              | 0    | 0  | 0  | 0  | 0  | 0   | 0   | 1  | 5  | 5  | 7  | 4   | 4  | 11  | 0  | 0   | 0   | 115  | 0   | 0   | 0   | 0   | 0   | 0   | 0   | 0   | 2    | 0   |   |
| 43  | EGFR        | GRB2        | 1qj1_B                                                              | 0    | 0  | 0  | 0  | 0  | 0   | 570 | 0  | 0  | 0  | 0  | 0   | 0  | 0   | 0  | 0   | 0   | 0    | 0   | 0   | 0   | 0   | 0   | 0   | 0   | 0   | 0    | 0   |   |
| 44  | EGFR        | GRB2        | 1qj1_C                                                              | 0    | 0  | 0  | 0  | 0  | 0   | 614 | 0  | 0  | 0  | 0  | 0   | 0  | 0   | 0  | 0   | 0   | 0    | 0   | 0   | 0   | 0   | 0   | 0   | 0   | 0   | 0    | 0   |   |
| 45  | EGFR        | GRB2        | 1qj1_D                                                              | 0    | 0  | 0  | 0  | 0  | 0   | 706 | 0  | 0  | 0  | 0  | 0   | 0  | 0   | 0  | 0   | 0   | 0    | 0   | 0   | 0   | 0   | 0   | 0   | 0   | 0   | 0    | 0   |   |
| 46  | EGFR        | GRB2        | 1qj1_E                                                              | 0    | 0  | 0  | 0  | 0  | 0   | 437 | 0  | 0  | 0  | 0  | 0   | 0  | 0   | 0  | 0   | 0   | 0    | 0   | 0   | 0   | 0   | 0   | 0   | 0   | 0   | 0    | 0   |   |
| 47  | EGFR        | GRB2        | 1qj1_F                                                              | 0    | 0  | 0  | 0  | 0  | 0   | 759 | 0  | 0  | 0  | 0  | 0   | 0  | 0   | 0  | 0   | 0   | 0    | 0   | 0   | 0   | 0   | 0   | 0   | 0   | 0   | 0    | 0   |   |
| 48  | EGFR        | GRB2        | 1qj1_G                                                              | 0    | 0  | 0  | 0  | 0  | 0   | 775 | 0  | 0  | 0  | 0  | 0   | 0  | 0   | 0  | 0   | 0   | 0    | 0   | 0   | 0   | 0   | 0   | 0   | 0   | 0   | 0    | 0   |   |
| 49  | EGFR        | GRB2        | 1qj1_H                                                              | 0    | 0  | 0  | 0  | 0  | 0   | 825 | 0  | 0  | 0  | 0  | 0   | 0  | 0   | 0  | 0   | 0   | 0    | 0   | 0   | 0   | 0   | 0   | 0   | 0   | 0   | 0    | 0   |   |
| 50  | EGFR        | GRB2        | 1qj1_I                                                              | 0    | 0  | 0  | 0  | 0  | 0   | 258 | 0  | 0  | 0  | 0  | 0   | 0  | 0   | 0  | 0   | 0   | 0    | 0   | 0   | 0   | 0   | 0   | 0   | 0   | 0   | 0    | 0   |   |
| 51  | EGFR        | GRB2        | 1qj1_J                                                              | 0    | 0  | 0  | 0  | 0  | 0   | 584 | 0  | 0  | 0  | 0  | 0   | 0  | 0   | 0  | 0   | 0   | 0    | 0   | 0   | 0   | 0   | 0   | 0   | 0   | 0   | 0    | 0   |   |
| 52  | GRB2        | MET         | 1qj1_B                                                              | 0    | 0  | 0  | 0  | 0  | 0   | 570 | 0  | 0  | 0  | 0  | 0   | 0  | 0   | 0  | 0   | 0   | 0    | 0   | 0   | 0   | 0   | 0   | 0   | 0   | 0   | 0    | 0   |   |
| 53  | GRB2        | MET         | 1qj1_C                                                              | 0    | 0  | 0  | 0  | 0  | 0   | 614 | 0  | 0  | 0  | 0  | 0   | 0  | 0   | 0  | 0   | 0   | 0    | 0   | 0   | 0   | 0   | 0   | 0   | 0   | 0   | 0    | 0   |   |
| 54  | GRB2        | MET         | 1qj1_D                                                              | 0    | 0  | 0  | 0  | 0  | 0   | 706 | 0  | 0  | 0  | 0  | 0   | 0  | 0   | 0  | 0   | 0   | 0    | 0   | 0   | 0   | 0   | 0   | 0   | 0   | 0   | 0    | 0   |   |
| 55  | GRB2        | MET         | 1qj1_E                                                              | 0    | 0  | 0  | 0  | 0  | 0   | 437 | 0  | 0  | 0  | 0  | 0   | 0  | 0   | 0  | 0   | 0   | 0    | 0   | 0   | 0   | 0   | 0   | 0   | 0   | 0   | 0    | 0   |   |
| 56  | GRB2        | MET         | 1qj1_F                                                              | 0    | 0  | 0  | 0  | 0  | 0   | 759 | 0  | 0  | 0  | 0  | 0   | 0  | 0   | 0  | 0   | 0   | 0    | 0   | 0   | 0   | 0   | 0   | 0   | 0   | 0   | 0    | 0   |   |
| 57  | GRB2        | MET         | 1qj1_G                                                              | 0    | 0  | 0  | 0  | 0  | 0   | 775 | 0  | 0  | 0  | 0  | 0   | 0  | 0   | 0  | 0   | 0   | 0    | 0   | 0   | 0   | 0   | 0   | 0   | 0   | 0   | 0    | 0   |   |
| 58  | GRB2        | MET         | 1qj1_H                                                              | 0    | 0  | 0  | 0  |    |     |     |    |    |    |    |     |    |     |    |     |     |      |     |     |     |     |     |     |     |     |      |     |   |

Table S4. (continued)

| No. | Interactor1 | Interactor2 | PDB entries used for detecting the pockets located on FPI interface | 113  | 114  | 115  | 116  | Druggability score (using structural attributes) |
|-----|-------------|-------------|---------------------------------------------------------------------|------|------|------|------|--------------------------------------------------|
| 1   | ARF1        | CYTH2       | 1s9d_A <sup>a</sup>                                                 | 4    | 148  | 1    | 0    | 0.8602                                           |
| 2   | ARF1        | CYTH2       | 1s9d_E <sup>b</sup>                                                 | 0    | 0    | 0    | 0    | 0.6310                                           |
| 3   | ARF1        | CYTH2       | 1r8q_A <sup>b</sup>                                                 | 100  | 223  | 2    | 0    | 0.9793                                           |
| 4   | ARF1        | CYTH2       | 1r8q_E <sup>b</sup>                                                 | 0    | 0    | 0    | 0    | 0.5617                                           |
| 5   | ARF1        | CYTH2       | 1r8q_B <sup>b</sup>                                                 | 48   | 160  | 3    | 0    | 0.9816                                           |
| 6   | ARF1        | CYTH2       | 1r8q_F <sup>b</sup>                                                 | 0    | 0    | 0    | 0    | 0.5684                                           |
| 7   | ARF1        | CYTH2       | 1r8q_BF <sup>c</sup>                                                | 0    | 0    | 0    | 0    | 0.9217                                           |
| 8   | ARF1        | CYTH2       | 1s9d_AE <sup>c</sup>                                                | 0    | 0    | 0    | 0    | 0.6139                                           |
| 9   | ARF1        | CYTH2       | 1r8s_AE <sup>c</sup>                                                | 0    | 0    | 1    | 0    | 0.8594                                           |
| 10  | ARF1        | CYTH1       | 1s9d_A <sup>b</sup>                                                 | 4    | 148  | 1    | 0    | 0.8602                                           |
| 11  | ARF1        | CYTH1       | 1s9d_E <sup>b</sup>                                                 | 0    | 0    | 0    | 0    | 0.6310                                           |
| 12  | ARF1        | CYTH1       | 1r8q_A <sup>b</sup>                                                 | 100  | 223  | 2    | 0    | 0.9793                                           |
| 13  | ARF1        | CYTH1       | 1r8q_E <sup>b</sup>                                                 | 0    | 0    | 0    | 0    | 0.5617                                           |
| 14  | ARF1        | CYTH1       | 1r8q_B <sup>b</sup>                                                 | 48   | 160  | 3    | 0    | 0.9816                                           |
| 15  | ARF1        | CYTH1       | 1r8q_F <sup>b</sup>                                                 | 0    | 0    | 0    | 0    | 0.5684                                           |
| 16  | ARF1        | CYTH1       | 1r8q_BF <sup>c</sup>                                                | 0    | 0    | 0    | 0    | 0.9217                                           |
| 17  | ARF1        | CYTH1       | 1s9d_AE <sup>c</sup>                                                | 0    | 0    | 0    | 0    | 0.6139                                           |
| 18  | ARF1        | CYTH1       | 1r8s_AE <sup>c</sup>                                                | 0    | 0    | 1    | 0    | 0.8594                                           |
| 19  | BAK1        | BCL2        | 2o2f_A                                                              | 0    | 0    | 168  | 0    | 0.9943                                           |
| 20  | BAK1        | BCL2        | 2o22_A                                                              | 0    | 0    | 51   | 0    | 0.9884                                           |
| 21  | BAK1        | BCL2        | 2o21_A                                                              | 0    | 0    | 106  | 0    | 0.9905                                           |
| 22  | BAK1        | BCL2        | 1ysw_A                                                              | 0    | 0    | 90   | 0    | 0.9902                                           |
| 23  | BAK1        | BCL2L1      | 2o2n_A                                                              | 0    | 0    | 146  | 3    | 0.9867                                           |
| 24  | BAK1        | BCL2L1      | 2o2m_A                                                              | 0    | 0    | 154  | 0    | 0.9950                                           |
| 25  | BAK1        | BCL2L1      | 2yxj_A                                                              | 0    | 0    | 13   | 0    | 0.9938                                           |
| 26  | BAK1        | BCL2L1      | 2yxj_B                                                              | 0    | 0    | 41   | 0    | 0.9957                                           |
| 27  | BAK1        | BCL2L1      | 1ysi_A                                                              | 0    | 0    | 46   | 0    | 0.9802                                           |
| 28  | BAK1        | BCL2L1      | 2w3l_A                                                              | 0    | 0    | 6    | 0    | 0.9639                                           |
| 29  | BAK1        | BCL2L1      | 2w3l_B                                                              | 0    | 0    | 5    | 0    | 0.9739                                           |
| 30  | BAK1        | BCL2L1      | 3inq_A                                                              | 0    | 0    | 158  | 26   | 0.9391                                           |
| 31  | BAK1        | BCL2L1      | 3inq_B                                                              | 0    | 0    | 258  | 0    | 0.9967                                           |
| 32  | CALM1       | CAMK1       | 1mux_A pocket1                                                      | 0    | 0    | 24   | 0    | 0.9952                                           |
| 33  | CALM1       | CAMK1       | 1mux_A pocket2                                                      | 0    | 0    | 28   | 0    | 0.9855                                           |
| 34  | CALM1       | MYLK        | 1mux_A pocket1                                                      | 0    | 0    | 24   | 0    | 0.9952                                           |
| 35  | CALM1       | MYLK        | 1mux_A pocket2                                                      | 0    | 0    | 28   | 0    | 0.9855                                           |
| 36  | CALM1       | PDE1A       | 1qiv_A                                                              | 0    | 0    | 0    | 0    | 1.0000                                           |
| 37  | CD4         | HLA-DQB1    | 1j4_D                                                               | 0    | 0    | 0    | 0    | 0.7982                                           |
| 38  | CREBBP      | TP53        | 2d82_A                                                              | 0    | 0    | 3    | 0    | 0.9815                                           |
| 39  | ESR1        | NCOA2       | 3erd_A                                                              | 0    | 0    | 82   | 0    | 0.7780                                           |
| 40  | ESR1        | NCOA2       | 3erd_B                                                              | 0    | 2    | 20   | 0    | 0.9159                                           |
| 41  | FKBP1A      | TGFBR1      | 1fkj_A                                                              | 0    | 0    | 204  | 0    | 0.9938                                           |
| 42  | FKBP1A      | TGFBR1      | 1fkf_A                                                              | 0    | 0    | 135  | 0    | 0.9825                                           |
| 43  | EGFR        | GRB2        | 1qj1_B                                                              | 0    | 0    | 315  | 0    | 0.9923                                           |
| 44  | EGFR        | GRB2        | 1qj1_C                                                              | 0    | 0    | 281  | 0    | 0.9928                                           |
| 45  | EGFR        | GRB2        | 1qj1_D                                                              | 0    | 0    | 191  | 0    | 0.9920                                           |
| 46  | EGFR        | GRB2        | 1qj1_E                                                              | 0    | 0    | 409  | 0    | 0.9943                                           |
| 47  | EGFR        | GRB2        | 1qj1_F                                                              | 0    | 0    | 139  | 0    | 0.9901                                           |
| 48  | EGFR        | GRB2        | 1qj1_G                                                              | 0    | 0    | 123  | 0    | 0.9903                                           |
| 49  | EGFR        | GRB2        | 1qj1_H                                                              | 0    | 0    | 72   | 0    | 0.9887                                           |
| 50  | EGFR        | GRB2        | 1qj1_I                                                              | 0    | 0    | 457  | 0    | 0.9952                                           |
| 51  | EGFR        | GRB2        | 1qj1_J                                                              | 0    | 0    | 299  | 0    | 0.9925                                           |
| 52  | GRB2        | MET         | 1qj1_B                                                              | 0    | 0    | 315  | 0    | 0.9923                                           |
| 53  | GRB2        | MET         | 1qj1_C                                                              | 0    | 0    | 281  | 0    | 0.9928                                           |
| 54  | GRB2        | MET         | 1qj1_D                                                              | 0    | 0    | 191  | 0    | 0.9920                                           |
| 55  | GRB2        | MET         | 1qj1_E                                                              | 0    | 0    | 409  | 0    | 0.9943                                           |
| 56  | GRB2        | MET         | 1qj1_F                                                              | 0    | 0    | 139  | 0    | 0.9901                                           |
| 57  | GRB2        | MET         | 1qj1_G                                                              | 0    | 0    | 123  | 0    | 0.9903                                           |
| 58  | GRB2        | MET         | 1qj1_H                                                              | 0    | 0    | 72   | 0    | 0.9887                                           |
| 59  | GRB2        | MET         | 1qj1_I                                                              | 0    | 0    | 457  | 0    | 0.9952                                           |
| 60  | GRB2        | MET         | 1qj1_J                                                              | 0    | 0    | 299  | 0    | 0.9925                                           |
| 61  | HOXB1       | PBX1        | 1b72_B                                                              | 0    | 0    | 65   | 76   | 0.8646                                           |
| 62  | IL1B        | IL1R1       | 1ltb_B                                                              | 0    | 0    | 4    | 3    | 0.8352                                           |
| 63  | IL2         | IL2RA       | 1py2_A                                                              | 0    | 5    | 1003 | 0    | 0.9474                                           |
| 64  | IL2         | IL2RA       | 1py2_B                                                              | 0    | 0    | 822  | 0    | 0.9560                                           |
| 65  | IL2         | IL2RA       | 1py2_C                                                              | 0    | 6    | 980  | 0    | 0.9920                                           |
| 66  | IL2         | IL2RA       | 1py2_D                                                              | 0    | 3    | 954  | 0    | 0.9889                                           |
| 67  | IL2         | IL2RA       | 1m48_A                                                              | 0    | 0    | 266  | 0    | 0.8257                                           |
| 68  | IL2         | IL2RA       | 1m48_B                                                              | 0    | 0    | 865  | 0    | 0.9447                                           |
| 69  | IL2         | IL2RA       | 1m4a_A                                                              | 0    | 0    | 2472 | 0    | 0.7358                                           |
| 70  | PTEN        | MAGI3       | 1be9_A                                                              | 0    | 0    | 130  | 0    | 0.9911                                           |
| 71  | MDM2        | TP53        | 1l4e_A                                                              | 0    | 0    | 109  | 0    | 0.9964                                           |
| 72  | MDM2        | TP53        | 1l4e_B                                                              | 0    | 0    | 107  | 0    | 0.9958                                           |
| 73  | MDM2        | TP53        | 1ltv_A                                                              | 0    | 0    | 170  | 4    | 0.9939                                           |
| 74  | MDM2        | TP53        | 3pz_A                                                               | 0    | 0    | 9    | 0    | 0.9663                                           |
| 75  | MDM2        | TP53        | 3lbt_A                                                              | 0    | 0    | 172  | 0    | 0.9974                                           |
| 76  | MDM2        | TP53        | 3lbt_A                                                              | 0    | 0    | 84   | 0    | 0.9704                                           |
| 77  | MDM2        | TP53        | 3lbt_C                                                              | 0    | 0    | 107  | 0    | 0.9916                                           |
| 78  | MDM2        | TP53        | 3lbt_E                                                              | 0    | 0    | 30   | 0    | 0.9609                                           |
| 79  | MDM4        | TP53        | 3lbt_E                                                              | 0    | 0    | 71   | 0    | 0.9956                                           |
| 80  | PDGFRB      | PIK3R1      | 1th9o_A                                                             | 0    | 0    | 139  | 25   | 0.9636                                           |
| 81  | RAC1        | TIAM1       | 1foe_B                                                              | 23   | 0    | 0    | 0    | 0.8975                                           |
| 82  | RAC1        | TIAM1       | 1foe_D                                                              | 23   | 0    | 0    | 0    | 0.8895                                           |
| 83  | RAC1        | TIAM1       | 1foe_F                                                              | 22   | 0    | 0    | 0    | 0.9060                                           |
| 84  | RAC1        | TIAM1       | 1foe_H                                                              | 21   | 2    | 0    | 0    | 0.9508                                           |
| 85  | RAC1        | TRIO        | 2nz8_A                                                              | 18   | 0    | 0    | 0    | 0.9146                                           |
| 86  | RAF1        | YWHAZ       | 3rdh_A                                                              | 0    | 0    | 798  | 2    | 0.9201                                           |
| 87  | RAF1        | YWHAZ       | 3rdh_B                                                              | 0    | 0    | 160  | 1    | 0.8790                                           |
| 88  | RAF1        | YWHAZ       | 3rdh_C                                                              | 0    | 0    | 240  | 0    | 0.8529                                           |
| 89  | RAF1        | YWHAZ       | 3rdh_D                                                              | 0    | 0    | 3    | 0    | 0.8211                                           |
| 90  | S100B       | TP53        | 3hcm_A                                                              | 0    | 0    | 2    | 0    | 0.8769                                           |
| 91  | S100B       | TP53        | 3hcm_B                                                              | 0    | 0    | 32   | 0    | 0.7313                                           |
| 92  | STAT3       | STAT3       | 1bg1_A                                                              | 0    | 0    | 0    | 0    | 0.5700                                           |
| 93  | BIRC5       | BIRC5       | 1e31_A                                                              | 0    | 2    | 0    | 0    | 0.9929                                           |
| 94  | BIRC5       | BIRC5       | 1e31_B                                                              | 0    | 0    | 7    | 0    | 0.9950                                           |
| 95  | BIRC5       | BIRC5       | 1f3h_A                                                              | 0    | 0    | 219  | 0    | 0.9954                                           |
| 96  | BIRC5       | BIRC5       | 1f3h_B                                                              | 0    | 0    | 4    | 0    | 0.9970                                           |
| 97  | BIRC5       | BIRC5       | 1xox_A                                                              | 0    | 0    | 459  | 0    | 0.9941                                           |
| 98  | BIRC5       | BIRC5       | 1xox_B                                                              | 0    | 0    | 505  | 0    | 0.9923                                           |
| 99  | CTNBN1      | TCF7L1      | 1g3l_A                                                              | 0    | 0    | 26   | 0    | 0.9865                                           |
| 100 | CTNBN1      | TCF7L1      | 1g3l_C                                                              | 0    | 0    | 51   | 0    | 0.9784                                           |
| 101 | CTNBN1      | TCF7L2      | 1g3l_A                                                              | 0    | 0    | 26   | 0    | 0.9865                                           |
| 102 | CTNBN1      | TCF7L2      | 1g3l_C                                                              | 0    | 0    | 51   | 0    | 0.9784                                           |
| 103 | THRB        | NCOA2       | 1bxy_B                                                              | 0    | 0    | 17   | 0    | 0.9720                                           |
| 104 | TNF         | TNF         | 2az5_AB                                                             | 0    | 0    | 0    | 0    | 0.7129                                           |
| 105 | TNF         | TNF         | 2az5_CD                                                             | 0    | 0    | 0    | 0    | 0.7210                                           |
| 106 | XIAP        | CASP3       | 1i3o_E pocket1                                                      | 85   | 30   | 0    | 0    | 0.4319                                           |
| 107 | XIAP        | CASP3       | 1i3o_E pocket2                                                      | 0    | 0    | 4    | 0    | 0.5627                                           |
| 108 | XIAP        | CASP3       | 1i3o_F pocket3                                                      | 64   | 15   | 2    | 0    | 0.4088                                           |
| 109 | XIAP        | CASP3       | 1i3o_F pocket4                                                      | 0    | 0    | 1    | 0    | 0.4982                                           |
| 110 | XIAP        | CASP9       | 1ft_A                                                               | 255  | 1342 | 0    | 0    | 0.8136                                           |
| 111 | XIAP        | CASP9       | 1mw9_A                                                              | 1828 | 1965 | 0    | 0    | 0.9305                                           |
| 112 | XIAP        | DIABLO      | 1g73_C                                                              | 2794 | 734  | 0    | 0    | 0.8154                                           |
| 113 | XIAP        | DIABLO      | 1g73_D                                                              | 2823 | 555  | 0    | 0    | 0.7672                                           |
| 114 | XIAP        | DIABLO      | 2o3y_A                                                              | 582  | 2986 | 0    | 0    | 0.9421                                           |
| 115 | CD247       | ZAP70       | 2oq1_A pocket1                                                      | 0    | 0    | 4663 | 296  | 0.8303                                           |
| 116 | CD247       | ZAP70       | 2oq1_A pocket2                                                      | 0    | 0    | 920  | 1680 | 0.2697                                           |

When the druggability of a positive instance (in row) was assessed by our SVM-based method, the number of times each positive instance (in column) was located nearest to the assessed positive instance in a feature space was shown in a cell.

<sup>a</sup> For the details of the attributes and pocket-constituting amino acids of the positive instances used for our SVM-based method, see [http://www.drois.net/positives\\_attributes.txt](http://www.drois.net/positives_attributes.txt) and [http://www.drois.net/positives\\_amino\\_acids.txt](http://www.drois.net/positives_amino_acids.txt).

<sup>b</sup> Brefeldin-binding pocket.

<sup>c</sup> Target pocket in Viaud J., Zeghouf M., Barelli H., Zee J.C., Padilla A., Guibert B., Chardin P., Royer C.A., Cherfils J. and Chavanieu A. (2007) Structure-based discovery of an inhibitor of Arf activation by Sec7 domains through targeting of protein-protein complexes. *Proc. Natl. Acad. Sci. U. S. A.*, **104**, 10370-10375.

Table S5. Matrix of the similarities of the positive instances assessed by our SVM model using drug/chemical attributes. <sup>a</sup>

| Table S3. Matrix of the similarities of the positive instances assessed by our SVM model using drug/chemical attributes. |        |          | 1    | 2    | 3 | 4   | 5    | 6    | 7    | 8    | 9    | 10   | 11 | 12   | 13   | 14   | 15 | 16  | 17   | 18 | 19   | 20   | 21   | 22   | 23   | 24   | 25  | 26   | 27 | 28 | 29   | 30  | 31   | 32 | 33   | 34     | Druggability score (using drug/chemical attributes) |
|--------------------------------------------------------------------------------------------------------------------------|--------|----------|------|------|---|-----|------|------|------|------|------|------|----|------|------|------|----|-----|------|----|------|------|------|------|------|------|-----|------|----|----|------|-----|------|----|------|--------|-----------------------------------------------------|
| 1                                                                                                                        | XIAP   | CASP3    | 2744 | 597  | 0 | 0   | 238  | 3670 | 206  | 162  | 0    | 0    | 0  | 0    | 0    | 905  | 0  | 0   | 0    | 0  | 2    | 191  | 0    | 0    | 3    | 484  | 0   | 0    | 0  | 0  | 0    | 170 | 397  | 0  | 0    | 0      | 0.9769                                              |
| 2                                                                                                                        | XIAP   | CASP9    | 0    | 2420 | 0 | 0   | 0    | 0    | 0    | 2967 | 0    | 0    | 0  | 0    | 0    | 0    | 0  | 0   | 0    | 0  | 0    | 0    | 0    | 0    | 0    | 0    | 0   | 0    | 0  | 0  | 0    | 0   | 0    | 0  | 0    | 0.5387 |                                                     |
| 3                                                                                                                        | XIAP   | DIABLO   | 0    | 2420 | 0 | 0   | 0    | 0    | 0    | 2967 | 0    | 0    | 0  | 0    | 0    | 0    | 0  | 0   | 0    | 0  | 0    | 0    | 0    | 0    | 0    | 0    | 0   | 0    | 0  | 0  | 0    | 0   | 0    | 0  | 0    | 0.5387 |                                                     |
| 4                                                                                                                        | BIRC5  | BIRC5    | 0    | 0    | 0 | 0   | 0    | 0    | 0    | 0    | 0    | 0    | 0  | 0    | 0    | 0    | 0  | 0   | 0    | 0  | 0    | 0    | 0    | 0    | 0    | 0    | 0   | 0    | 0  | 0  | 0    | 0   | 0    | 0  | 0    | 0.0000 |                                                     |
| 5                                                                                                                        | ARF1   | CYTH2    | 1450 | 88   | 0 | 0   | 2222 | 607  | 0    | 399  | 0    | 0    | 0  | 0    | 0    | 1770 | 0  | 0   | 0    | 0  | 13   | 72   | 0    | 0    | 0    | 1281 | 0   | 0    | 0  | 0  | 0    | 0   | 2058 | 0  | 1    | 0      | 0.9961                                              |
| 6                                                                                                                        | ARF1   | CYTH1    | 179  | 1347 | 0 | 0   | 0    | 3691 | 0    | 1454 | 0    | 0    | 0  | 0    | 0    | 0    | 0  | 0   | 0    | 0  | 24   | 0    | 0    | 0    | 220  | 0    | 0   | 0    | 0  | 0  | 0    | 110 | 0    | 0  | 0    | 0.7025 |                                                     |
| 7                                                                                                                        | BAK1   | BCL2     | 0    | 0    | 0 | 5   | 0    | 0    | 4818 | 101  | 0    | 0    | 0  | 0    | 0    | 0    | 0  | 0   | 0    | 0  | 0    | 0    | 0    | 0    | 0    | 0    | 0   | 0    | 0  | 0  | 1747 | 0   | 0    | 0  | 0    | 0.6671 |                                                     |
| 8                                                                                                                        | BAK1   | BCL2L1   | 0    | 55   | 0 | 2   | 0    | 0    | 0    | 4934 | 0    | 0    | 0  | 0    | 0    | 0    | 0  | 0   | 0    | 0  | 0    | 0    | 0    | 0    | 0    | 0    | 0   | 0    | 0  | 0  | 0    | 0   | 0    | 0  | 0    | 0.4991 |                                                     |
| 9                                                                                                                        | CALM1  | MYLK     | 307  | 11   | 0 | 0   | 1    | 216  | 1399 | 1    | 7329 | 470  | 0  | 2    | 0    | 0    | 0  | 0   | 0    | 0  | 3    | 17   | 0    | 0    | 39   | 1    | 0   | 2    | 0  | 0  | 0    | 182 | 15   | 0  | 3    | 0      | 0.9998                                              |
| 10                                                                                                                       | CALM1  | PDE1A    | 309  | 7    | 0 | 0   | 11   | 94   | 1073 | 1    | 1827 | 5978 | 0  | 1    | 0    | 1    | 0  | 0   | 0    | 0  | 39   | 21   | 0    | 0    | 18   | 11   | 0   | 132  | 0  | 0  | 0    | 97  | 376  | 0  | 3    | 1      | 1.0000                                              |
| 11                                                                                                                       | CALM1  | CAMK1    | 307  | 11   | 0 | 0   | 1    | 216  | 1399 | 1    | 7329 | 470  | 0  | 2    | 0    | 0    | 0  | 0   | 0    | 0  | 3    | 17   | 0    | 0    | 39   | 1    | 0   | 2    | 0  | 0  | 0    | 182 | 15   | 0  | 3    | 0      | 0.9998                                              |
| 12                                                                                                                       | CD247  | ZAP70    | 0    | 25   | 0 | 0   | 0    | 0    | 0    | 1271 | 0    | 0    | 0  | 6542 | 0    | 0    | 0  | 0   | 0    | 0  | 0    | 74   | 0    | 0    | 0    | 0    | 0   | 0    | 0  | 0  | 0    | 0   | 0    | 0  | 0    | 0      | 0.7912                                              |
| 13                                                                                                                       | CD4    | HLA-DQB1 | 0    | 0    | 0 | 0   | 484  | 0    | 0    | 0    | 0    | 0    | 0  | 671  | 6903 | 0    | 0  | 0   | 0    | 0  | 8    | 0    | 1847 | 0    | 0    | 0    | 0   | 0    | 0  | 0  | 0    | 0   | 0    | 0  | 0    | 0      | 0.9913                                              |
| 14                                                                                                                       | CREBBP | TP53     | 0    | 39   | 0 | 2   | 0    | 0    | 0    | 1724 | 0    | 0    | 0  | 0    | 0    | 5525 | 0  | 0   | 0    | 0  | 0    | 0    | 0    | 0    | 0    | 104  | 0   | 0    | 0  | 0  | 0    | 0   | 3    | 0  | 0    | 0      | 0.7397                                              |
| 15                                                                                                                       | CTNNB1 | TCF7L2   | 0    | 55   | 0 | 2   | 0    | 0    | 0    | 4934 | 0    | 0    | 0  | 0    | 0    | 0    | 0  | 0   | 0    | 0  | 0    | 0    | 0    | 0    | 0    | 0    | 0   | 0    | 0  | 0  | 0    | 0   | 0    | 0  | 0    | 0      | 0.4991                                              |
| 16                                                                                                                       | CTNNB1 | TCF7L1   | 0    | 55   | 0 | 2   | 0    | 0    | 0    | 4934 | 0    | 0    | 0  | 0    | 0    | 0    | 0  | 0   | 0    | 0  | 0    | 0    | 0    | 0    | 0    | 0    | 0   | 0    | 0  | 0  | 0    | 0   | 0    | 0  | 0    | 0      | 0.4991                                              |
| 17                                                                                                                       | EGFR   | GRB2     | 4    | 0    | 0 | 0   | 0    | 0    | 56   | 0    | 0    | 0    | 0  | 161  | 1123 | 0    | 0  | 0   | 4432 | 0  | 5    | 31   | 0    | 1487 | 1907 | 0    | 0   | 748  | 0  | 0  | 0    | 36  | 8    | 0  | 0    | 0      | 0.9998                                              |
| 18                                                                                                                       | ESR1   | NCOA2    | 166  | 0    | 0 | 0   | 117  | 111  | 130  | 0    | 1517 | 263  | 0  | 0    | 0    | 0    | 0  | 19  | 6566 | 66 | 59   | 0    | 222  | 56   | 5    | 0    | 456 | 0    | 0  | 0  | 14   | 182 | 0    | 49 | 0    | 0.9998 |                                                     |
| 19                                                                                                                       | FKBP1A | TGFBR1   | 1725 | 2    | 0 | 0   | 516  | 1610 | 543  | 0    | 0    | 0    | 0  | 0    | 0    | 72   | 0  | 516 | 0    | 0  | 2840 | 236  | 0    | 2    | 58   | 68   | 0   | 570  | 0  | 0  | 0    | 86  | 521  | 0  | 1150 | 0      | 0.9999                                              |
| 20                                                                                                                       | GRB2   | MET      | 306  | 156  | 0 | 0   | 5    | 3056 | 0    | 154  | 0    | 0    | 0  | 3528 | 0    | 211  | 0  | 0   | 0    | 0  | 0    | 2395 | 0    | 0    | 0    | 135  | 0   | 0    | 0  | 0  | 0    | 0   | 18   | 0  | 0    | 0      | 0.9964                                              |
| 21                                                                                                                       | HOXB1  | PBX1     | 0    | 0    | 0 | 0   | 0    | 0    | 0    | 0    | 0    | 0    | 0  | 0    | 0    | 0    | 0  | 0   | 0    | 0  | 0    | 0    | 0    | 0    | 0    | 0    | 0   | 0    | 0  | 0  | 0    | 0   | 0    | 0  | 0    | 0.0000 |                                                     |
| 22                                                                                                                       | IL1B   | IL1R1    | 0    | 0    | 0 | 17  | 0    | 0    | 379  | 5    | 0    | 0    | 0  | 43   | 4314 | 0    | 0  | 0   | 17   | 0  | 0    | 4    | 0    | 4503 | 2    | 0    | 0   | 516  | 0  | 0  | 0    | 191 | 0    | 0  | 0    | 0      | 0.9991                                              |
| 23                                                                                                                       | IL2    | IL2RA    | 15   | 0    | 0 | 0   | 0    | 27   | 80   | 0    | 0    | 0    | 0  | 1556 | 31   | 0    | 0  | 0   | 314  | 0  | 0    | 236  | 0    | 30   | 6088 | 0    | 0   | 1517 | 0  | 0  | 0    | 46  | 0    | 0  | 0    | 0      | 0.9940                                              |
| 24                                                                                                                       | MDM2   | TP53     | 0    | 645  | 0 | 0   | 0    | 0    | 0    | 1117 | 0    | 0    | 0  | 0    | 0    | 3083 | 0  | 0   | 0    | 0  | 0    | 0    | 0    | 0    | 0    | 3153 | 0   | 0    | 0  | 0  | 0    | 0   | 6    | 0  | 0    | 0      | 0.8004                                              |
| 25                                                                                                                       | MDM4   | TP53     | 0    | 55   | 0 | 2   | 0    | 0    | 0    | 4934 | 0    | 0    | 0  | 0    | 0    | 0    | 0  | 0   | 0    | 0  | 0    | 0    | 0    | 0    | 0    | 0    | 0   | 0    | 0  | 0  | 0    | 0   | 0    | 0  | 0    | 0      | 0.4991                                              |
| 26                                                                                                                       | PDGFRB | PIK3R1   | 31   | 0    | 0 | 0   | 0    | 0    | 2548 | 2    | 0    | 0    | 0  | 125  | 0    | 1    | 0  | 0   | 7    | 0  | 12   | 1    | 0    | 988  | 74   | 2    | 0   | 5247 | 0  | 0  | 0    | 901 | 12   | 0  | 0    | 0      | 0.9951                                              |
| 27                                                                                                                       | PTEN   | MAGI3    | 0    | 0    | 0 | 0   | 0    | 0    | 0    | 0    | 0    | 0    | 0  | 0    | 0    | 0    | 0  | 0   | 0    | 0  | 0    | 0    | 0    | 0    | 0    | 0    | 0   | 0    | 0  | 0  | 0    | 0   | 0    | 0  | 0    | 0.0000 |                                                     |
| 28                                                                                                                       | RAC1   | TIAM1    | 0    | 55   | 0 | 2   | 0    | 0    | 0    | 4934 | 0    | 0    | 0  | 0    | 0    | 0    | 0  | 0   | 0    | 0  | 0    | 0    | 0    | 0    | 0    | 0    | 0   | 0    | 0  | 0  | 0    | 0   | 0    | 0  | 0    | 0      | 0.4991                                              |
| 29                                                                                                                       | RAC1   | TRIO     | 0    | 55   | 0 | 2   | 0    | 0    | 0    | 4934 | 0    | 0    | 0  | 0    | 0    | 0    | 0  | 0   | 0    | 0  | 0    | 0    | 0    | 0    | 0    | 0    | 0   | 0    | 0  | 0  | 0    | 0   | 0    | 0  | 0    | 0      | 0.4991                                              |
| 30                                                                                                                       | RAF1   | YWHAZ    | 0    | 0    | 0 | 106 | 0    | 0    | 549  | 0    | 0    | 0    | 0  | 0    | 0    | 0    | 0  | 0   | 0    | 0  | 0    | 0    | 0    | 0    | 0    | 0    | 0   | 0    | 0  | 0  | 3866 | 0   | 0    | 0  | 0    | 0.4521 |                                                     |
| 31                                                                                                                       | S100B  | TP53     | 0    | 1536 | 0 | 0   | 0    | 338  | 0    | 512  | 0    | 0    | 0  | 0    | 0    | 1451 | 0  | 0   | 0    | 0  | 0    | 1    | 0    | 0    | 0    | 1827 | 0   | 0    | 0  | 0  | 0    | 0   | 3014 | 0  | 0    | 0      | 0.8679                                              |
| 32                                                                                                                       | STAT3  | STAT3    | 0    | 0    | 0 | 0   | 0    | 0    | 0    | 0    | 0    | 0    | 0  | 0    | 0    | 0    | 0  | 0   | 0    | 0  | 0    | 0    | 0    | 0    | 0    | 0    | 0   | 0    | 0  | 0  | 0    | 0   | 0    | 0  | 0    | 0.0000 |                                                     |
| 33                                                                                                                       | THRB   | NCOA2    | 615  | 22   | 0 | 0   | 1080 | 1964 | 17   | 95   | 0    | 0    | 0  | 0    | 0    | 650  | 0  | 0   | 0    | 0  | 482  | 345  | 0    | 0    | 2    | 300  | 0   | 0    | 0  | 0  | 0    | 0   | 354  | 0  | 4074 | 0      | 1.0000                                              |
| 34                                                                                                                       | TNF    | TNF      | 0    | 0    | 0 | 0   | 0    | 0    | 38   | 0    | 17   | 330  | 0  | 102  | 1058 | 0    | 0  | 0   | 104  | 0  | 0    | 19   | 0    | 1327 | 16   | 0    | 0   | 108  | 0  | 0  | 0    | 24  | 8    | 0  | 0    | 6847   | 0.9998                                              |

When the druggability of a positive instance (in row) was assessed by our SVM-based method, the number of times each positive instance (in column) was located nearest to the assessed positive instance in a feature space was shown in a cell.

<sup>a</sup> For the details of the attributes of the positive instances used for our SVM-based method, see [http://www.drpias.net/positives\\_attributes.txt](http://www.drpias.net/positives_attributes.txt).

Table S6. Matrix of the similarities of the positive instances assessed by our SVM model using functional attributes.<sup>a</sup>

| No. Interactor1 Interactor2 |        |          | 1    | 2    | 3    | 4    | 5    | 6    | 7    | 8    | 9    | 10   | 11   | 12   | 13   | 14   | 15   | 16   | 17   | 18   | 19  | 20   | 21   | 22   | 23   | 24   | 25   | 26   | 27   | 28   | 29   | 30   | 31  | 32   | 33     | 34     | Druggability score (using functional attributes) |        |
|-----------------------------|--------|----------|------|------|------|------|------|------|------|------|------|------|------|------|------|------|------|------|------|------|-----|------|------|------|------|------|------|------|------|------|------|------|-----|------|--------|--------|--------------------------------------------------|--------|
| 1                           | XIAP   | CASP3    | 4190 | 66   | 5358 | 0    | 31   | 21   | 0    | 31   | 290  | 0    | 0    | 0    | 0    | 0    | 0    | 0    | 0    | 0    | 0   | 0    | 0    | 0    | 0    | 3    | 0    | 0    | 0    | 0    | 0    | 0    | 0   | 0    | 0      | 0      | 0.9990                                           |        |
| 2                           | XIAP   | CASP9    | 0    | 6717 | 3089 | 0    | 0    | 0    | 2    | 118  | 0    | 0    | 0    | 0    | 0    | 0    | 0    | 0    | 0    | 0    | 0   | 0    | 0    | 0    | 0    | 0    | 0    | 0    | 0    | 0    | 0    | 0    | 0   | 0    | 0      | 0      | 0.9926                                           |        |
| 3                           | XIAP   | DIABLO   | 0    | 3    | 7700 | 0    | 0    | 2    | 0    | 178  | 0    | 0    | 0    | 0    | 0    | 0    | 0    | 0    | 0    | 0    | 0   | 0    | 0    | 0    | 0    | 0    | 0    | 0    | 0    | 0    | 0    | 0    | 0   | 0    | 0      | 0      | 0.7883                                           |        |
| 4                           | BIRC5  | BIRC5    | 0    | 0    | 0    | 6325 | 0    | 0    | 0    | 0    | 0    | 0    | 0    | 3    | 0    | 0    | 0    | 0    | 0    | 351  | 0   | 0    | 707  | 0    | 1895 | 0    | 0    | 0    | 0    | 0    | 0    | 0    | 0   | 0    | 717    | 0      | 0.9998                                           |        |
| 5                           | ARF1   | CYTH2    | 1    | 0    | 6    | 0    | 5747 | 2009 | 0    | 0    | 3    | 0    | 0    | 0    | 0    | 0    | 0    | 0    | 0    | 0    | 0   | 0    | 0    | 0    | 0    | 0    | 0    | 0    | 0    | 0    | 0    | 0    | 0   | 0    | 0      | 0      | 0.7766                                           |        |
| 6                           | ARF1   | CYTH1    | 1    | 0    | 6    | 0    | 65   | 7114 | 0    | 0    | 3    | 0    | 0    | 0    | 0    | 0    | 0    | 0    | 0    | 0    | 0   | 0    | 0    | 0    | 0    | 0    | 0    | 0    | 0    | 0    | 0    | 0    | 0   | 0    | 0      | 0      | 0.7189                                           |        |
| 7                           | BAK1   | BCL2     | 0    | 6    | 16   | 0    | 0    | 0    | 8895 | 515  | 0    | 0    | 0    | 0    | 0    | 0    | 0    | 0    | 0    | 0    | 0   | 0    | 0    | 0    | 0    | 0    | 0    | 0    | 0    | 0    | 0    | 0    | 0   | 0    | 0      | 0      | 0.9432                                           |        |
| 8                           | BAK1   | BCL2L1   | 0    | 0    | 34   | 0    | 0    | 0    | 589  | 8339 | 0    | 0    | 0    | 0    | 0    | 0    | 0    | 0    | 0    | 0    | 0   | 0    | 0    | 0    | 0    | 0    | 0    | 0    | 0    | 0    | 0    | 0    | 0   | 0    | 0      | 0      | 0.8962                                           |        |
| 9                           | CALM1  | MYLK     | 375  | 0    | 2    | 0    | 20   | 1216 | 0    | 0    | 7870 | 416  | 72   | 0    | 0    | 0    | 0    | 0    | 0    | 0    | 0   | 0    | 0    | 0    | 0    | 0    | 0    | 0    | 0    | 0    | 0    | 0    | 0   | 0    | 0      | 0      | 0.9971                                           |        |
| 10                          | CALM1  | PDE1A    | 0    | 0    | 0    | 0    | 0    | 0    | 0    | 0    | 538  | 7678 | 452  | 0    | 0    | 0    | 0    | 0    | 0    | 0    | 0   | 0    | 630  | 0    | 0    | 0    | 0    | 0    | 385  | 0    | 0    | 0    | 155 | 0    | 0      | 0      | 0.9838                                           |        |
| 11                          | CALM1  | CAMK1    | 0    | 0    | 731  | 0    | 0    | 0    | 0    | 62   | 763  | 2778 | 5653 | 0    | 0    | 0    | 0    | 0    | 0    | 0    | 0   | 0    | 0    | 0    | 0    | 0    | 0    | 0    | 4    | 0    | 0    | 0    | 0   | 0    | 0      | 0      | 0.9991                                           |        |
| 12                          | CD247  | ZAP70    | 0    | 0    | 0    | 0    | 0    | 0    | 0    | 0    | 0    | 0    | 0    | 0    | 8045 | 0    | 0    | 0    | 0    | 10   | 0   | 0    | 0    | 0    | 2    | 0    | 0    | 0    | 0    | 0    | 0    | 0    | 0   | 239  | 0      | 0      | 0.8296                                           |        |
| 13                          | CD4    | HLA-DQB1 | 0    | 824  | 27   | 0    | 0    | 0    | 15   | 750  | 45   | 0    | 26   | 0    | 8303 | 0    | 1    | 0    | 0    | 0    | 0   | 0    | 0    | 0    | 0    | 0    | 0    | 0    | 0    | 0    | 0    | 0    | 0   | 0    | 0      | 0      | 0.9991                                           |        |
| 14                          | CREBBP | TP53     | 294  | 50   | 2    | 0    | 2    | 0    | 8    | 88   | 21   | 0    | 0    | 0    | 3744 | 2153 | 99   | 449  | 0    | 197  | 137 | 0    | 0    | 0    | 1773 | 574  | 58   | 0    | 1    | 40   | 274  | 1    | 35  | 0    | 0      | 1.0000 |                                                  |        |
| 15                          | CTNNB1 | TCF7L2   | 42   | 0    | 0    | 0    | 0    | 42   | 0    | 184  | 63   | 0    | 0    | 0    | 1    | 237  | 6706 | 1353 | 0    | 263  | 25  | 0    | 0    | 0    | 666  | 274  | 0    | 0    | 0    | 132  | 0    | 0    | 12  | 0    | 0      | 1.0000 |                                                  |        |
| 16                          | CTNNB1 | TCF7L1   | 0    | 0    | 0    | 0    | 0    | 0    | 0    | 0    | 0    | 6    | 0    | 0    | 0    | 0    | 6414 | 0    | 0    | 0    | 0   | 0    | 0    | 0    | 0    | 0    | 0    | 0    | 2030 | 0    | 0    | 1546 | 0   | 0    | 0      | 0.9996 |                                                  |        |
| 17                          | EGFR   | GRB2     | 1191 | 181  | 0    | 0    | 0    | 0    | 2    | 106  | 33   | 0    | 0    | 0    | 362  | 0    | 610  | 4758 | 0    | 43   | 354 | 0    | 0    | 0    | 282  | 144  | 573  | 14   | 197  | 159  | 986  | 0    | 0   | 0    | 0      | 0.9995 |                                                  |        |
| 18                          | ESR1   | NCOA2    | 0    | 0    | 0    | 0    | 0    | 0    | 8    | 0    | 0    | 4    | 0    | 0    | 0    | 0    | 5    | 0    | 6923 | 0    | 0   | 2    | 1    | 0    | 0    | 0    | 0    | 3    | 0    | 0    | 0    | 117  | 0   | 2851 | 0      | 0.9914 |                                                  |        |
| 19                          | FKBP1A | TGFBR1   | 27   | 0    | 1    | 0    | 1259 | 700  | 0    | 0    | 7    | 0    | 0    | 0    | 0    | 0    | 0    | 0    | 0    | 7030 | 0   | 0    | 0    | 0    | 0    | 916  | 0    | 0    | 0    | 2    | 0    | 0    | 0   | 0    | 0      | 0.9942 |                                                  |        |
| 20                          | GRB2   | MET      | 2797 | 224  | 217  | 0    | 0    | 0    | 0    | 13   | 178  | 0    | 1    | 0    | 0    | 0    | 0    | 424  | 163  | 0    | 70  | 2522 | 0    | 0    | 0    | 878  | 496  | 0    | 639  | 1358 | 20   | 0    | 0   | 0    | 0      | 1.0000 |                                                  |        |
| 21                          | HOXB1  | PBX1     | 0    | 0    | 0    | 0    | 0    | 0    | 0    | 0    | 0    | 33   | 0    | 0    | 0    | 0    | 0    | 0    | 0    | 0    | 0   | 0    | 7492 | 0    | 0    | 0    | 0    | 2    | 0    | 0    | 0    | 0    | 19  | 0    | 0      | 19     | 0                                                | 0.7546 |
| 22                          | IL1B   | IL1R1    | 0    | 1518 | 1429 | 0    | 0    | 0    | 71   | 14   | 0    | 77   | 0    | 0    | 0    | 0    | 0    | 0    | 0    | 0    | 0   | 0    | 0    | 6842 | 0    | 0    | 0    | 0    | 0    | 0    | 0    | 0    | 16  | 0    | 0      | 0      | 0.9967                                           |        |
| 23                          | IL2    | IL2RA    | 0    | 0    | 0    | 2    | 0    | 0    | 0    | 0    | 0    | 0    | 0    | 1943 | 0    | 0    | 0    | 0    | 23   | 0    | 0   | 52   | 0    | 7901 | 0    | 0    | 0    | 0    | 0    | 0    | 0    | 0    | 0   | 59   | 0      | 0.9980 |                                                  |        |
| 24                          | MDM2   | TP53     | 58   | 47   | 0    | 0    | 0    | 0    | 9    | 84   | 30   | 0    | 0    | 0    | 721  | 2156 | 118  | 435  | 0    | 366  | 60  | 0    | 0    | 0    | 4796 | 812  | 32   | 3    | 2    | 30   | 192  | 9    | 40  | 0    | 0      | 1.0000 |                                                  |        |
| 25                          | MDM4   | TP53     | 249  | 0    | 3    | 0    | 1    | 285  | 0    | 1    | 192  | 0    | 0    | 0    | 0    | 0    | 262  | 0    | 0    | 1767 | 172 | 0    | 0    | 0    | 0    | 6596 | 0    | 0    | 0    | 139  | 2    | 312  | 0   | 0    | 0      | 0.9981 |                                                  |        |
| 26                          | PDGFRB | PIK3R1   | 388  | 138  | 0    | 0    | 0    | 0    | 0    | 0    | 316  | 0    | 1    | 0    | 0    | 0    | 231  | 349  | 0    | 76   | 326 | 0    | 0    | 0    | 0    | 440  | 3910 | 172  | 611  | 2313 | 726  | 0    | 0   | 0    | 0      | 0.9997 |                                                  |        |
| 27                          | PTEN   | MAGI3    | 0    | 0    | 0    | 0    | 0    | 0    | 0    | 0    | 0    | 0    | 0    | 0    | 0    | 0    | 0    | 0    | 0    | 0    | 0   | 0    | 0    | 0    | 0    | 0    | 0    | 2251 | 0    | 0    | 0    | 0    | 0   | 0    | 0.2251 |        |                                                  |        |
| 28                          | RAC1   | TIAM1    | 132  | 0    | 0    | 0    | 0    | 0    | 0    | 0    | 54   | 0    | 0    | 0    | 0    | 0    | 1257 | 1    | 0    | 0    | 596 | 0    | 0    | 0    | 0    | 0    | 1216 | 1393 | 3189 | 2162 | 0    | 0    | 0   | 0    | 0      | 1.0000 |                                                  |        |
| 29                          | RAC1   | TRIO     | 81   | 0    | 0    | 0    | 338  | 242  | 0    | 0    | 537  | 0    | 0    | 0    | 0    | 0    | 0    | 0    | 0    | 1114 | 332 | 0    | 0    | 0    | 0    | 547  | 395  | 0    | 87   | 6275 | 32   | 0    | 0   | 0    | 0      | 0.9980 |                                                  |        |
| 30                          | RAF1   | YWHAZ    | 478  | 9    | 0    | 0    | 225  | 116  | 0    | 0    | 127  | 0    | 0    | 0    | 0    | 0    | 0    | 354  | 0    | 605  | 284 | 0    | 0    | 0    | 19   | 208  | 640  | 0    | 2    | 1695 | 5234 | 0    | 0   | 0    | 0      | 0.9996 |                                                  |        |
| 31                          | S100B  | TP53     | 0    | 0    | 0    | 0    | 0    | 0    | 0    | 0    | 0    | 117  | 1    | 0    | 0    | 0    | 343  | 0    | 2    | 0    | 0   | 0    | 0    | 0    | 0    | 146  | 0    | 262  | 0    | 0    | 0    | 8859 | 0   | 0    | 0      | 0.9730 |                                                  |        |
| 32                          | STAT3  | STAT3    | 16   | 0    | 0    | 0    | 371  | 168  | 0    | 1    | 1    | 0    | 0    | 0    | 0    | 950  | 1758 | 0    | 245  | 0    | 791 | 60   | 0    | 0    | 0    | 1351 | 0    | 17   | 0    | 11   | 100  | 491  | 0   | 3669 | 0      | 1.0000 |                                                  |        |
| 33                          | THRB   | NCOA2    | 0    | 0    | 0    | 0    | 0    | 0    | 0    | 0    | 0    | 12   | 0    | 0    | 0    | 0    | 0    | 0    | 0    | 114  | 0   | 0    | 4    | 0    | 0    | 0    | 0    | 124  | 0    | 0    | 0    | 0    | 0   | 7263 | 0      | 0.7517 |                                                  |        |
| 34                          | TNF    | TNF      | 0    | 64   | 0    | 0    | 0    | 0    | 11   | 0    | 0    | 0    | 0    | 5144 | 1    | 8    | 29   | 19   | 15   | 0    | 0   | 0    | 27   | 0    | 35   | 0    | 1    | 0    | 0    | 0    | 0    | 0    | 0   | 8    | 4638   | 1.0000 |                                                  |        |

When the druggability of a positive instance (in row) was assessed by our SVM-based method, the number of times each positive instance (in column) was located nearest to the assessed positive instance in a feature space was shown in a cell.

<sup>a</sup> For the details of the attributes of the positive instances used for our SVM-based method, see [http://www.drpias.net/positives\\_attributes.txt](http://www.drpias.net/positives_attributes.txt).
